# Supplementary material for: Syntheses and electronic structures of μ-nitrido bridged pyridine, diimine iridium complexes
Source: Royal Society of Chemistry journal article supplement (doi:10.1039/c4cc03624g), 2014-01-01
Supplement: c4cc03624g1.pdf [file c4cc03624g1.pdf]

# Supporting material

## Syntheses and Electronic Structures of $\mu$ -Nitrido Bridged Pyridine, Diimine Iridium Complexes

Friedrich Angersbach-Bludau, Christopher Schulz, Julia Schöffel, and Peter Burger \*

\* Institut für Anorganische und Angewandte Chemie, Fachbereich Chemie, Universität Hamburg, Martin-Luther-King-Platz 6, 20146 Hamburg, Germany Fax: +49-40-42838-6097

To whom correspondence should be addressed: Email: [burger@chemie.uni-hamburg.de](mailto:burger@chemie.uni-hamburg.de)

### Table of Contents

#### 1) Experimental Section

|                                            |     |
|--------------------------------------------|-----|
| a) General                                 | S1  |
| b) Syntheses and Spectroscopic Data        | S5  |
| c) X-ray Crystallographic Studies          | S12 |
| d) Spectroscopic and Thermoanalytical Data |     |
| UV-Vis                                     | S19 |
| NMR                                        | S20 |
| DTA/DTG/MS                                 | S31 |
| IR                                         | S32 |
| CV                                         | S33 |
| EPR                                        | S34 |
| XPS                                        | S35 |
| ESI-MS                                     | S37 |

|                          |     |
|--------------------------|-----|
| 2) Computational Studies | S39 |
|--------------------------|-----|

|               |     |
|---------------|-----|
| 3) References | S65 |
|---------------|-----|

## 1) Experimental Section

### a) General

All manipulations of the complexes were performed under standard Schlenk techniques or in a dinitrogen filled glovebox. Toluene, *n*-pentane, *n*-hexane, diethyl ether (Et<sub>2</sub>O) and tetrahydrofuran (THF) were distilled under N<sub>2</sub> from sodium benzophenone ketyl and stored under nitrogen or were obtained from a MBraun solvent purification system. Isotopically labelled NaN<sub>3</sub> (terminal <sup>15</sup>N, 98%) was used as purchased from Cambridge Isotope Laboratories. All other reagents were purchased from commercial sources and were used as received. The dinuclear Ir precursor [Ir(C<sub>2</sub>H<sub>4</sub>)<sub>2</sub>Cl]<sub>2</sub>,<sup>S1</sup> the ligand N<sub>3</sub>Me<sub>4</sub>,<sup>S2</sup> the acid [H(Et<sub>2</sub>O)<sub>2</sub>][Al(pftb)<sub>4</sub>]<sup>S3</sup> and 4-*tert*-butyl-2,6-diacetylpyridine<sup>S4</sup> were prepared as described in literature. The following complexes were prepared according to literature procedures: [Ir(Me<sub>4</sub>N<sub>3</sub>)N<sub>3</sub>], [Ir(Me<sub>4</sub>N<sub>3</sub>)(THF)][OTf], [Ir(Me<sub>4</sub>N<sub>3</sub>)(THF)][Al(pftb)<sub>4</sub>], [Ir(<sup>t</sup>BuMe<sub>4</sub>N<sub>3</sub>)(Me)(OTf)<sub>2</sub>].<sup>S4, S5</sup>

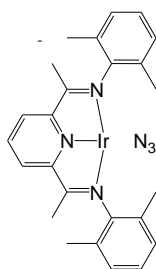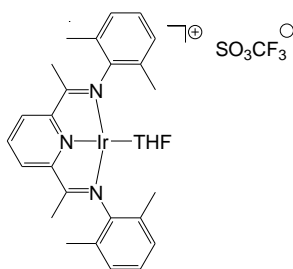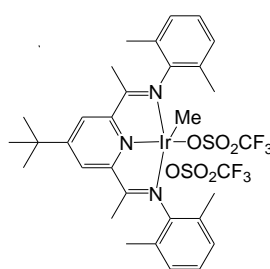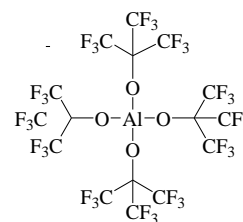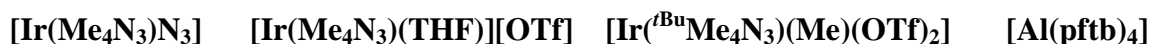

Me<sub>4</sub>N<sub>3</sub> = 2,6-Bis-[1-(2,6-Dimethylphenylimino)ethyl]pyridine

$^1\text{H}$ ,  $^{13}\text{C}$ ,  $^{11}\text{B}$ ,  $^{15}\text{N}$  and  $^{19}\text{F}$  NMR spectra were recorded on Bruker Avance 400, Bruker DRX 500 and Varian Gemini 2000 BB NMR spectrometers. The  $^1\text{H}$  and  $^{13}\text{C}$  NMR spectra are referenced to the residual resonances of the solvent. The  $^{19}\text{F}$  NMR shifts are referenced to  $\text{CCl}_3\text{F}$  as an external standard.  $^{13}\text{C}$  and  $^{19}\text{F}$  resonances are singlets if not otherwise stated. The assignments of the  $^{13}\text{C}$  NMR spectra were carried out by combined analyses of DEPT and  $^{13}\text{C}$ - $^1\text{H}$  correlated spectra (HSQC and HMBC). The numbering scheme for the assignment of the  $^1\text{H}$  and  $^{13}\text{C}$  NMR resonances is displayed below.

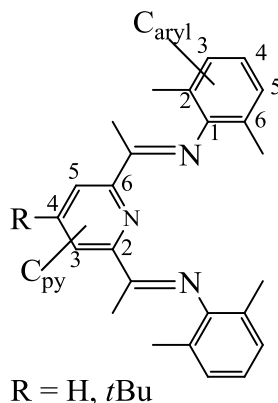

For the description of the multiplets, the following abbreviations are used: **s**: singlet, **d**: doublet, **dd**: doublet of doublet, **t**: triplet, **q**: quartet, **sept**: septet, **m**: multiplet. For paramagnetic NMR spectra, **br** stands for broad peak and **vbr** corresponds to a very broad peak.

The effective magnetic moments ( $\mu_{\text{eff}}$ ) in THF- $d_8$  solution were determined by the Evans' method using a coaxial double NMR tube.<sup>S6, S7</sup> A solution of the paramagnetic complex was placed in the outer tube, while the inner tube contained only THF- $d_8$ . The magnetic moment  $\mu_{\text{eff}}$  was calculated at 298 K from the following equations:

$$\chi_g = (-3\Delta f)/(4\pi f m) + \chi_0 + [\chi_0 (d_0 - d_s)]/m$$

$$\chi_M = 477 \cdot \frac{\Delta \nu}{Q \nu_I c}$$

$$\mu_{\text{eff}} = 2.828(\chi_M T)^{1/2}$$

$\Delta f$  corresponds to the chemical shift differences of the NMR solvent in the inner and outer coaxial tube. The spectrometer frequency ( $f$  or  $\nu_I$ ) is used in Hz,  $m$  equals to the mass of the substance per  $\text{cm}^3$  of solution, respectively  $c$  to the concentration per volume,  $\chi_0$  is the mass susceptibility of the THF- $d_8$  solvent.<sup>S8</sup> The last term is neglected due to its minimal contribution to the mass susceptibility of the solute. The density of the pure solvent is given by  $d_0$  and  $d_s$  is the density of the solution (in  $[\text{g}/\text{cm}^3]$ ). The molar susceptibility ( $\chi_m$ ) is the product of  $\chi_g$  multiplied by the molecular weight of the paramagnetic complex.

IR spectra were recorded as KBr pellets on a Bruker Vertex 70 IR spectrometer. The intensities of the vibrational bands are indicated as follows: **vs**: very strong, **s**: strong, **m**: medium, **w**: weak. UV/vis spectra were measured on a Cary 50 Scan UV/Vis spectrometer. Elemental analyses were measured by: Zentrale Elementaranalyse, Universität Hamburg. Thermogravimetry coupled mass spectrometry (TG-MS) measurements were recorded on a Netzsch STA 409C/CD instrument coupled with a Balzers MID quadrupole mass spectrometer. EPR spectra were measured on an X-band Bruker Elexsys E500 CW machine. CV measurements were performed using a BAS100BW potentiostat with a standard three-electrode configuration in a single cell. A glassy carbon disk working electrode (diameter = 3.0 mm) was utilized in combination with a Pt (wire) auxiliary electrode. The reference electrode consisted of an Ag wire pseudo-reference; cyclic voltammograms were referenced against the  $[\text{Cp}_2\text{Fe}]^{+/0}$  couple added to the solution at the end of the measurement. The CVs were recorded at RT under a nitrogen atmosphere in THF using  $[\text{NBu}_4][\text{PF}_6]$  as supporting electrolyte. The working electrode was polished with alumina slurry to achieve a mirror finish, then thoroughly rinsed with purified water (LaboStar™ Range of UltraPureWater System) and dried in a 40°C oven. The electrochemical solvent (THF, Chromasolv, Fluka) was distilled from sodium/benzophenone, degassed and stored under  $\text{N}_2$  in a J. Young Teflon tapped solvent vessel. The conductivity salt  $[\text{NBu}_4][\text{PF}_6]$  was recrystallized twice from methanol and thoroughly dried at 100 °C under vacuum. **XPS** spectra were recorded at the Christian-Albrechts-Universität Kiel on an Omicron Full-Lab (Omicron GmbH) XPS spectrometer using X-ray Al  $K\alpha$  radiation. All spectra were referenced to the C(1s) ionization potential of 284.6 eV. The program XPSPEAK for WIN95/98 version 4.1 was used for the data analysis and the Ir(4f) signals were fitted as a doublet with fixed spin orbit splitting of 2.98 eV in consideration of the different intensity ratios of the spin split f-states. The sample preparation of the crystalline samples was performed quickly under non-inert condition to avoid contact with the atmosphere. ESI-MS measurements were performed on a Finnigan ThermoQuest MAT 95 XL-spektrometer or for Cryo ESI MS measurements on an ultra high resolution electrospray quadrupole TOF mass spectrometer (Bruker Maxis) coupled with cryospray at the University of Erlangen. Samples were prepared in THF with concentrations of 40-50  $\mu\text{g/ml}$ . The capillary was heated to 80°C and the low temperature measurements were recorded at -40 °C.

## b) Synthesis and Spectroscopic Data

### 1. Synthesis of $\text{Ir}_2\text{N}_3^{+\text{OTf}-}$

To a  $-35\text{ }^\circ\text{C}$  cold suspension of 41.5 mg (638  $\mu\text{mol}$ )  $\text{NaN}_3$  in THF (5 ml) was added a  $-35\text{ }^\circ\text{C}$  cold solution of 500 mg (638  $\mu\text{mol}$ )  $[\text{Ir}(\text{Me}_4\text{N}_3)(\text{THF})][\text{OTf}]$  in THF (5 ml). This mixture was stirred at room temperature for 4 h. After filtering off the solid precipitate, the filtrate was evaporated to dryness in vacuum. The black solid residue can be used without further purification. Yield: 621 mg (472  $\mu\text{mol}$ , 74%). Single crystals for X-ray diffraction were obtained by vapor diffusion of pentane into a concentrated solution of the complex in THF. **UV/vis**  $\lambda_{\text{max}}(\text{THF})$  [nm] = 323, 427, 537, 830. **IR (KBr)** [ $\text{cm}^{-1}$ ] = 2145s ( $\nu_{\text{as}}(\text{N}_3)$ ), 1271 vs ( $\nu_{\text{as}}(\text{OTf})$ ).  **$^1\text{H}$  NMR (200 MHz, THF- $d_8$ )**  $\delta$  [ppm] = 8.55 (2 H, t,  $^3J = 7.9\text{ Hz}$ ,  $\text{C}_{\text{py}}(4)\text{H}$ ), 8.06 (4 H, d,  $^3J = 7.9\text{ Hz}$ ,  $\text{C}_{\text{py}}(3,5)\text{H}$ ), 7.01 - 6.85 (12 H, m,  $\text{C}_{\text{arom}}(3,4,5)\text{H}$ ), 1.93 (24H, s,  $\text{CH}_3$ ), 1.41 (12H, s,  $\text{N}=\text{C}-\text{CH}_3$ ).  **$^{13}\text{C}\{^1\text{H}\}$  NMR (100 MHz, THF- $d_8$ )**  $\delta$  [ppm] = 175.5 ( $\text{C}=\text{N}$ ), 163.7 ( $\text{C}_{\text{py}}(2,6)$ ), 152.7 ( $\text{C}_{\text{arom}}(1)$ ), 131.5 ( $\text{C}_{\text{arom}}(2,6)$ ), 129.7 and 127.6 ( $\text{C}_{\text{arom}}(3,4,5)$ ), 128.5 ( $\text{C}_{\text{py}}(4)$ ), 124.6 ( $\text{C}_{\text{py}}(3,5)$ ), 18.9 ( $\text{CH}_3$ ), 18.2 ( $\text{N}=\text{C}-\text{CH}_3$ ).  **$^{19}\text{F}\{^1\text{H}\}$  NMR (188 MHz, THF- $d_8$ )**  $\delta$  [ppm] = -78.9 (s, 3F,  $\text{CF}_3$ ). Presumably due to the thermal instability of this compound correct elemental analytical data could not be obtained.

### 2. Synthesis of $\text{Ir}_2\text{N}_3^{+\text{Al}-}$

To a solution of 28 mg (47  $\mu\text{mol}$ )  $[\text{Ir}(\text{N}_3\text{Me}_4)\text{N}_3]$  in 1.5 ml THF 75 mg (47  $\mu\text{mol}$ ) of the cationic complex ( $[\text{Ir}(\text{N}_3\text{Me}_4)(\text{THF})][\text{Al}(\text{pftb})_4]$  dissolved in 1.5 ml THF was added, upon which an immediate color change to violet was noticed. After stirring for 20 min at RT, the solvent was removed in vacuum. Yield: 98 mg (46  $\mu\text{mol}$ ; 98 %). **UV/vis**  $\lambda_{\text{max}}(\text{THF})$  [nm] = 317, 423, 531, 824. **IR (KBr)** [ $\text{cm}^{-1}$ ] = 2151(s) ( $\nu_{\text{as}}(\text{N}_3)$ ).  **$^1\text{H}$  NMR (400 MHz, THF- $d_8$ )**  $\delta$  [ppm] = 8.52 (t, 2H,  $^3J = 8.0\text{ Hz}$ ,  $\text{C}_{\text{py}}\text{H}(4)$ ); 7.97 (d, 4H,  $^3J = 8.0\text{ Hz}$ ,  $\text{C}_{\text{py}}\text{H}(3,5)$ ); 7.00 (d, 8H,  $^3J = 7.5\text{ Hz}$ ,  $\text{C}_{\text{arom}}\text{H}(3,5)$ ); 6.89 (t, 4H,  $^3J = 7.5\text{ Hz}$ ,  $\text{C}_{\text{arom}}\text{H}(4)$ ); 1.92 (s, 24H,  $\text{CH}_3$ ); 1.40 (s, 12H,  $\text{NC}-\text{CH}_3$ ).  **$^{13}\text{C}\{^1\text{H}\}$  NMR (100 MHz, THF- $d_8$ )**  $\delta$  [ppm] = 174.7 ( $\text{C}=\text{N}$ ); 163.1 ( $\text{C}_{\text{py}}(2,6)$ ); 151.9 ( $\text{C}_{\text{arom}}(1)$ ); 130.8 ( $\text{C}_{\text{arom}}(2,6)$ ); 129.4 ( $\text{C}_{\text{arom}}(3,5)$ ); 127.8 ( $\text{C}_{\text{py}}(4)$ ); 127.3 ( $\text{C}_{\text{arom}}(4)$ ); 124.0 ( $\text{C}_{\text{py}}(3,5)$ ); 18.4 ( $\text{CH}_3$ ); 17.8 ( $\text{NC}-\text{CH}_3$ ). The signals of the quaternary carbons of the  $\text{C}(\text{CF}_3)_3$  group of the counter anion could not be detected.  **$^{19}\text{F}\{^1\text{H}\}$  NMR (188**

**MHz, THF-*d*<sub>8</sub>)  $\delta$  [ppm]** = -74.3 (s, 36F, CF<sub>3</sub>). Due to the thermal instability of this compound correct elemental analytical data could not be obtained.

### 3. Synthesis of <sup>t</sup>BuIr<sub>2</sub>N<sub>3</sub><sup>+BPh<sub>4</sub>-</sup>

To a solution of 200 mg (306  $\mu$ mol) of the chlorido complex [Ir(<sup>t</sup>BuN<sub>3</sub>Me<sub>4</sub>)Cl] in 6 ml THF was added a solution of 105 mg (306  $\mu$ mol) Na[BPh<sub>4</sub>] and 20 mg (306  $\mu$ mol) NaN<sub>3</sub> in 5 ml THF. After one hour stirring at room temperature, the color changed from green through brown to finally deep violet. After filtering off the solid precipitate the filtrate was evaporated to dryness in vacuum. After co-evaporation several times with n-pentane, the solid was dried in vacuum for 4 hours. Yield: 390 mg (245  $\mu$ mol, 80%). **IR (KBr) [cm<sup>-1</sup>]** = 2143 (s) ( $\nu_{as}(N_3)$ ). **<sup>1</sup>H NMR (400 MHz, THF-*d*<sub>8</sub>):  $\delta$  [ppm]** = 7.97 (d, 4H, <sup>3</sup>J = 8.0 Hz, C<sub>py</sub>H(3,5)); 7.00 (d, 8H, <sup>3</sup>J = 7.5 Hz, C<sub>arom</sub>H(3,5)); 6.89 (t, 4H, <sup>3</sup>J = 7.5 Hz, C<sub>arom</sub>H(4)); 1.92 (s, 24H, CH<sub>3</sub>); 1.40 (s, 9H, C<sub>py</sub>CCH<sub>3</sub>); 1.32 (s, 12H, NC-CH<sub>3</sub>). **<sup>13</sup>C{<sup>1</sup>H} NMR (100 MHz, THF-*d*<sub>8</sub>):  $\delta$  [ppm]** = 174.7 (NC-CH<sub>3</sub>); 163.1 (C<sub>py</sub>(2,6)); 151.9 (C<sub>arom</sub>(1)); 130.8 (C<sub>arom</sub>(2,6)); 129.4 (C<sub>arom</sub>(3,5)); 127.8 (C<sub>py</sub>(4)); 127.3 (C<sub>arom</sub>(4)); 124.0 (C<sub>py</sub>(3,5)); 18.4 (CH<sub>3</sub>); 17.8 (NC-CH<sub>3</sub>). **<sup>11</sup>B NMR 200 MHz, THF-*d*<sub>8</sub>)  $\delta$  [ppm]** = -29(q, BPh<sub>4</sub>). **MS (ESI/THF): [m/z]** = 1273.4 [(<sup>t</sup>BuMe<sub>4</sub>N<sub>3</sub>)Ir( $\mu$ -1,3-N<sub>3</sub>)Ir(<sup>t</sup>BuMe<sub>4</sub>N<sub>3</sub>)]<sup>+</sup>; 319 [B(Ph)<sub>4</sub>]<sup>-</sup> (100%). **EA** calculated for C<sub>82</sub>H<sub>90</sub>BIr<sub>2</sub>N<sub>9</sub>: C 61.67%; H 5.68%; N 7.89%; found: C 61.23%; H 5.73%; N 7.34%.

### Synthesis of <sup>t</sup>BuIr<sub>2</sub><sup>14/15</sup>N<sub>3</sub><sup>+BPh<sub>4</sub>-</sup>

To a solution of 98 mg (150  $\mu$ mol) of the chlorido complex [Ir(<sup>t</sup>BuN<sub>3</sub>Me<sub>4</sub>)Cl] in 6 ml THF was added a solution of 51 mg (150  $\mu$ mol) Na[BPh<sub>4</sub>] and a suspension of 10 mg (152  $\mu$ mol) Na<sup>14/15</sup>N<sub>3</sub> in 5 ml THF. After 1.5 h stirring at room temperature, the color changed slowly from green to deep violet. After filtering off the solid precipitate the filtrate was evaporated to dryness in vacuum. After co-evaporation several times with n-pentane, the solid was dried in vacuum for 4 hours. Yield: 180 mg (113  $\mu$ mol, 75%). **IR (KBr) [cm<sup>-1</sup>]** = 2127 (s) ( $\nu_{as}(^{15}N_3)$ ). **<sup>1</sup>H NMR (400 MHz, THF-*d*<sub>8</sub>):  $\delta$  [ppm]** = 7.97 (d, 4H, <sup>3</sup>J = 8.0 Hz, C<sub>py</sub>H(3,5)); 7.00 (d, 8H, <sup>3</sup>J = 7.5 Hz, C<sub>arom</sub>H(3,5)); 6.89 (t, 4H, <sup>3</sup>J = 7.5 Hz, C<sub>arom</sub>H(4)); 1.92 (s, 24H, CH<sub>3</sub>); 1.40 (s, 9H, C<sub>py</sub>CCH<sub>3</sub>); 1.32 (s, 12H, NC-CH<sub>3</sub>).

#### 4. Synthesis of $\text{Ir}_2\text{N}^{+\text{OTf}^-}$ (photolysis route)

A solution of 100 mg (76  $\mu\text{mol}$ )  $\text{Ir}_2\text{N}_3^{+\text{OTf}^-}$  in 100 ml of a mixture of THF/ether (4:1) was photolyzed for 3 h in a “donut shaped” Schlenk tube with high vacuum teflon tap at room temperature with a medium pressure mercury lamp (Philips HPK-125-UV) using a 1M  $\text{NaNO}_2$  solution as UV cutoff filter ( $\lambda > 400$  nm). The obtained burgundy red solution was dried in vacuum. After co-evaporating several times with n-pentane the compound was dried for 3h in vacuum. Yield: 96 mg (75  $\mu\text{mol}$ , 98%). Crystals suitable for X-ray diffraction formed during photolysis. **UV/vis  $\lambda_{\text{max}}$ (THF) [nm] = 368, 505, 625, 770.**  **$^1\text{H}$  NMR (400 MHz, RT, THF- $d_8$ )  $\delta$  [ppm] = 118 (vbs,  $\omega_{1/2}$  70 Hz (0.18 ppm), 6H, NC- $\text{CH}_3$ ); 21.87 (bs,  $\omega_{1/2}$  15 Hz (0.038 ppm), 2H,  $\text{C}_{\text{py}}\text{H}(3,5)$ ); 11.32 (d, 4H,  $^3\text{J} = 14$  Hz,  $\text{C}_{\text{arom}}\text{H}(3,5)$ ); 5.94 (t, 2H,  $^3\text{J} = 14$  Hz,  $\text{C}_{\text{arom}}\text{H}(4)$ ); 3.98 (s, 12H,  $\text{CH}_3$ ), -88.55 (vbs,  $\omega_{1/2}$  60 Hz (0.15 ppm), 1H,  $\text{C}_{\text{py}}\text{H}(4)$ ).**  **$^{19}\text{F}\{^1\text{H}\}$  NMR (188 MHz, THF- $d_8$ )  $\delta$  [ppm] = -78.9 (s, 3F,  $\text{CF}_3$ ).** Correct elemental analytical data could not be obtained.

#### 5. Synthesis of $\text{Ir}_2\text{N}^{+\text{Al}^-}$ (photolysis route)

A solution of 160 mg (75  $\mu\text{mol}$ ) of  $\text{Ir}_2\text{N}_3^{+\text{Al}^-}$  in 100 ml of a mixture of THF/ether/hexane (4:1:1) was transferred to a “donut shaped” Schlenk tube with teflon tap and photolyzed for 3 hours at room temperature by a medium pressure mercury lamp (Philips HPK-125-UV). A filter solution of 1M  $\text{NaNO}_2$  was used as a UV cutoff filter ( $\lambda > 400$  nm). The obtained burgundy red solution was dried in vacuum, then co-evaporated several times with n-pentane and finally dried for 3h in vacuum. Yield: 153 mg (73  $\mu\text{mol}$ ; 96%). **UV/vis  $\lambda_{\text{max}}$ (THF) [nm] = 368, 505, 625, 770.**  **$^1\text{H}$  NMR (400 MHz, RT, THF- $d_8$ ):  $\delta$  [ppm] = 121.23 (vbs,  $\omega_{1/2}$  70 Hz (0.18 ppm), 6H, NC- $\text{CH}_3$ ), 22.81 (bs,  $\omega_{1/2}$  15 Hz (0.038 ppm), 2H,  $\text{C}_{\text{py}}\text{H}(3,5)$ ), 11.32 (d, 4H,  $^3\text{J} = 16$  Hz,  $\text{C}_{\text{arom}}\text{H}(3,5)$ ), 5.94 (t, 2H,  $^3\text{J} = 16$  Hz,  $\text{C}_{\text{arom}}\text{H}(4)$ ), 3.98 (s, 12H,  $\text{CH}_3$ ), -88.55 (vbs,  $\omega_{1/2}$  60 Hz (0.15 ppm), 1H,  $\text{C}_{\text{py}}\text{H}(4)$ ).**  **$^{19}\text{F}\{^1\text{H}\}$  NMR (188 MHz, RT, THF- $d_8$ ):  $\delta$  [ppm] = -76.1 (s, 36F,  $\text{CF}_3$ ).** **MS (ESI/THF): [m/z] = 1136.4  $[(\text{Me}_4\text{N}_3)\text{Ir}(\text{N})\text{Ir}(\text{Me}_4\text{N}_3)]^+$  (100%); 967.0  $[\text{Al}(\text{pftb})_4]^-$  (100%).** **EA** calculated for  $\text{C}_{78}\text{H}_{78}\text{AlF}_{36}\text{Ir}_2\text{N}_7\text{O}_5$ : C 40.93%; H 3.43%; N 4.28%; found: C 40.50%; H 4.00%; N 4.96%.

#### 6. Synthesis of $^t\text{BuIr}_2\text{N}^{+\text{BPh}_4^-}$ (photolysis route)

A solution of 96 mg (60  $\mu\text{mol}$ ) of the cationic azido compound  $^t\text{BuIr}_2\text{N}_3^{+\text{BPh}_4^-}$  in 100 ml of a mixture of THF/ether/hexane (2:1:1) was photolyzed by a medium pressure mercury lamp

(Philips HPK-125-UV) for 3h using a 1M NaNO<sub>2</sub> UV cutoff filter. The obtained burgundy red solution was dried in vacuum, co-evaporated a few times with n-pentane; the product was finally dried for 5h in vacuum. Yield: 90 mg (57 μmol; 95%). X-ray crystals could be isolated from the obtained burgundy red solution. **<sup>1</sup>H-NMR (400 MHz, RT, THF-*d*<sub>8</sub>):** δ [ppm] = 129.91 (vbs, ω<sub>1/2</sub> 75 Hz (0.19 ppm), 6H, NC-CH<sub>3</sub>); 20.03 (bs, ω<sub>1/2</sub> 15 Hz (0.038 ppm), 2H, C<sub>py</sub>H(3,5)); 11.64 (d, 4H, <sup>3</sup>J = 16 Hz, C<sub>arom</sub>H(3,5)); 5.46 (t, 2H, <sup>3</sup>J = 16 Hz, C<sub>arom</sub>H(4)); 4.03 (s, 12H, CH<sub>3</sub>); 3.54 (s, 9H (overlapping with THF at RT, 9H at lower temperature), C<sub>py</sub>CCH<sub>3</sub>). Susceptibility measurements by the Evans method at 298 K: ν = 400 MHz, Δf = 2.25 Hz, c(<sup>*t*</sup>BuIr<sub>2</sub>N<sup>+BPh<sub>4</sub>-</sup>) = 4.5 mM, Q = 2 (superconducting magnet factor), T = 293 K, μ<sub>eff</sub> = 3.23 μ<sub>B</sub>. **<sup>11</sup>B NMR (200 MHz, THF-*d*<sub>8</sub>):** δ [ppm] = -8(q, BPh<sub>4</sub>). **MS (ESI/THF):** [m/z] = 1249.5 [(<sup>*t*</sup>BuMe<sub>4</sub>N<sub>3</sub>)Ir(N) Ir(<sup>*t*</sup>BuMe<sub>4</sub>N<sub>3</sub>)]<sup>+</sup> (100%) simulated: 1249.5 [(<sup>*t*</sup>BuMe<sub>4</sub>N<sub>3</sub>)Ir(N)Ir(<sup>*t*</sup>BuMe<sub>4</sub>N<sub>3</sub>)]<sup>+</sup> (75%). **EA** calculated for C<sub>82</sub>H<sub>90</sub>BIr<sub>2</sub>N<sub>7</sub>: C 62.78%; H 5.78%; N 6.25%; found: C 62.60%; H 5.85%; N 7.01%.

#### Synthesis of Ir<sub>2</sub>N<sup>+OTf-</sup> (solid thermolysis route)

Solid Ir<sub>2</sub>N<sub>3</sub><sup>+OTf-</sup> (184 mg, 140 μmol) was placed in a teflon tapped Schlenk tube and was heated to 100 °C for one day under permanent vacuum, upon which the color changed to burgundy red. Further purification is not required. Yield: 180 mg (139 μmol, 99%).

#### Synthesis of Ir<sub>2</sub>N<sup>+Al-</sup> (solid thermolysis route)

100 mg (47 μmol) Ir<sub>2</sub>N<sub>3</sub><sup>+Al-</sup> were kept in a teflon tapped Schlenk tube under vacuum at 100 °C for one day. After this period the color changed to burgundy red and the N<sub>2</sub> extrusion was complete. Yield: 99 mg (47 μmol, quantitative).

#### Synthesis of <sup>*t*</sup>BuIr<sub>2</sub>N<sup>+BPh<sub>4</sub>-</sup> (solid thermolysis route)

120 mg (75 μmol) <sup>*t*</sup>BuIr<sub>2</sub>N<sub>3</sub><sup>+BPh<sub>4</sub>-</sup> were thermolyzed under vacuum in a teflon tapped Schlenk tube at 110 °C for one day. After this period the color changed to burgundy red and the N<sub>2</sub> extrusion was complete. Yield: 115 mg (73 μmol, 98%).



## Synthesis of $^{t\text{Bu}}\text{Ir}_2^{14/15}\text{N}^{+\text{BPh}_4-}$ (solid thermolysis route)

20 mg (12  $\mu\text{mol}$ )  $^{t\text{Bu}}\text{Ir}_2^{14/15}\text{N}_3^{+\text{BPh}_4-}$  were placed in a teflon capped Schlenk tube under vacuum at 110 °C for one day. After this period the color changed to burgundy red and the  $\text{N}_2$  extrusion was complete. Yield: 19 mg (122  $\mu\text{mol}$ , quantitative).

## 7. Synthesis of $\text{Ir}_2\text{N}$

To a solution of 20 mg (10  $\mu\text{mol}$ ) of  $\text{Ir}_2\text{N}^{+\text{Al}^-}$  in 5 ml THF at -35 °C was added a solution of 20  $\mu\text{l}$  (20  $\mu\text{mol}$ )  $\text{NaHBET}_3$  in 5 ml THF. After 10 min stirring at room temperature the color changed from burgundy red to deep violet. The solvents were removed in vacuum and the residue was dried for six hours in vacuum. Residual solvents were co-evaporated with two portions of 10 ml pentane each. The product was extracted from the residue into pentane. After drying in vacuum for 4 hours 11 mg (9.7  $\mu\text{mol}$ , 97%) of the product was obtained as a violet powder. **UV/vis**  $\lambda_{\text{max}}(\text{THF})$  [nm] = 546.  **$^1\text{H}$  NMR (200MHz, RT, THF- $d_8$ )  $\delta$  [ppm]** = 153 (bs, 6H, NC- $\text{CH}_3$ ); 15.4 (bs, 2H,  $\text{C}_{\text{py}}\text{H}(3,5)$ ); 13.00 (d, 4H,  $J = 8$  Hz,  $\text{C}_{\text{arom}}\text{H}(3,5)$ ); 4.91 (s, 12H,  $\text{CH}_3$ ); 4.36 (t, 2H,  $J = 8$  Hz,  $\text{C}_{\text{arom}}\text{H}(4)$ ); -91 (bs, 1H,  $\text{C}_{\text{py}}\text{H}(4)$ ).  **$^1\text{H}$  NMR (400 MHz,  $\text{C}_6\text{D}_6$ ):  $\delta$  [ppm]** = 151.0 (bs, 6H, NC- $\text{CH}_3$ ); 15.4 (bs, 2H,  $\text{C}_{\text{py}}\text{H}(3,5)$ ); 13.0 (d, 4H,  $^3J = 8$  Hz,  $\text{C}_{\text{arom}}\text{H}(3,5)$ ); 4.9 (s, 12H,  $\text{CH}_3$ ); 4.4 (t, 2H,  $^3J = 8$  Hz,  $\text{C}_{\text{arom}}\text{H}(4)$ ); -91 (vbs, 1H,  $\text{C}_{\text{py}}\text{H}(4)$ ). **MS (ESI/THF): [m/z]** = found: 1136.4  $[(\text{Me}_4\text{N}_3)\text{Ir}(\mu\text{-N})\text{Ir}(\text{Me}_4\text{N}_3)]^+$  (98%); simulated: 1136.4  $[(\text{Me}_4\text{N}_3)\text{Ir}(\mu\text{-N})\text{Ir}(\text{Me}_4\text{N}_3)]^+$  (98%). **EA** calculated for  $\text{C}_{50}\text{H}_{54}\text{Ir}_2\text{N}_7$ : C 52.80%; H 4.79%; N 8.62%; found: C 52.70%; H 4.39%; N 9.00%

## 8. Synthesis of $^{t\text{Bu}}\text{Ir}_2\text{N}$

To a cooled solution (-35 °C) of 30 mg (19  $\mu\text{mol}$ )  $^{t\text{Bu}}\text{Ir}_2\text{N}^{+\text{BPh}_4-}$  in 5 ml THF was added 40  $\mu\text{l}$  (40  $\mu\text{mol}$ ) of a 1M THF solution of  $\text{NaHBET}_3$  diluted in 5 ml THF. After one hour stirring at room temperature the color changed from burgundy red to deep violet. After filtering off a solid precipitate, the filtrate was evaporated to dryness in vacuum, then 3x co-evaporated with n-pentane. After drying in vacuum for 4 hours a violet powder was obtained. Yield 21 mg (17  $\mu\text{mol}$ , 95 %).  **$^1\text{H}$  NMR (400 MHz, RT,  $\text{C}_6\text{D}_6$ ):  $\delta$  [ppm]** = 150.89 (vbs,  $\omega_{1/2}$  400 Hz (1.0 ppm), 6H, NC- $\text{CH}_3$ ); 15.35 (bs, 2H,  $\omega_{1/2}$  11 Hz (0.028 ppm),  $\text{C}_{\text{py}}\text{H}(3,5)$ ); 13.00 (d, 4H,  $^3J = 8$  Hz,  $\text{C}_{\text{arom}}\text{H}(3,5)$ ); 4.91 (s, 12H,  $\text{CH}_3$ ); 4.36 (t, 2H,  $^3J = 8$  Hz,  $\text{C}_{\text{arom}}\text{H}(4)$ ); 3.34 (s, 9H,  $\text{C}_{\text{py}}\text{CCH}_3$ ). Susceptibility by Evans method:  $\nu = 300$  MHz,  $\Delta f = 12$  Hz,  $c(^{t\text{Bu}}\text{Ir}_2\text{N}) = 8.6$  mM,  $Q = 2$  (superconducting magnet factor),  $T = 293$  K,  $\mu_{\text{eff}} = 3.03 \mu_{\text{B}}$ . **MS (ESI/THF): [m/z]** =

1250.5 [(Me<sub>4</sub>N<sub>3</sub>)Ir(μ-N)Ir(Me<sub>4</sub>N<sub>3</sub>)]<sup>+</sup>(100%). EA calculated for C<sub>58</sub>H<sub>70</sub>Ir<sub>2</sub>N<sub>7</sub>: C 55.74%, H 5.65%, N 7.85%, found: C 55.87%, H 5.71%, N 8.14%

### Comproportionation of <sup>t</sup>BuIr<sub>2</sub>N<sup>+BPh<sub>4</sub>-</sup> and <sup>t</sup>BuIrN<sub>2</sub><sup>-Na+</sup> to <sup>t</sup>BuIr<sub>2</sub>N

To a solution of 20 mg (16 μmol) <sup>t</sup>BuIr<sub>2</sub>N<sup>-Na+</sup> in 0.4 ml THF-d<sub>8</sub> was a solution of 22 mg (16.5 μmol) <sup>t</sup>BuIr<sub>2</sub>N<sup>+BPh<sub>4</sub>-</sup> in 0.4 ml THF-d<sub>8</sub> added (in portions of 0.1 ml). Complete conversion was determined by <sup>1</sup>H NMR (1:1 ratio, see Figure S20).

### Alternative with Cobaltocene [Cp<sub>2</sub>Co] or TDAE ((NMe<sub>2</sub>)<sub>2</sub>C=C(NMe<sub>2</sub>)<sub>2</sub>):

To a solution of 14 mg (8.8 μmol) <sup>t</sup>BuIr<sub>2</sub>N<sup>+BPh<sub>4</sub>-</sup> in 0.4 ml THF-d<sub>8</sub> was added a solution of 2 μL (5 μmol) TDAE in 0.4 ml THF-d<sub>8</sub>. Complete conversion was determined by <sup>1</sup>H NMR.

To a solution of 10 mg (6.4 μmol) <sup>t</sup>BuIr<sub>2</sub>N<sup>+BPh<sub>4</sub>-</sup> in 0.4 ml THF-d<sub>8</sub> was added a solution of 2.5 mg (13 μmol) [Cp<sub>2</sub>Co] in 0.4 ml THF-d<sub>8</sub>. Complete conversion was determined by <sup>1</sup>H NMR. No consecutive reaction to <sup>t</sup>BuIr<sub>2</sub>N<sup>-</sup> was observed.

## 9. Synthesis of Ir<sub>2</sub>N<sup>-Na+</sup>

To a solution of 22 mg (19 μmol) Ir<sub>2</sub>N in 5 ml THF was added a solution of 7 mg (38 μmol) NaN(SiMe<sub>3</sub>)<sub>2</sub> in 5 ml THF. The mixture was stirred for 20 min at room temperature and the solvent was removed in vacuum. After recrystallization from THF/pentane and drying in vacuum a violet powder was obtained. Yield: 23 mg (18.6 μmol, 98%). UV/vis λ<sub>max</sub>(THF) [nm] = 380, 450 (shoulder), 550 (intensive), 880 (broad). <sup>1</sup>H-NMR (300 MHz, THF-d<sub>8</sub>): δ [ppm] = 8.16 (d, 2H, <sup>3</sup>J = 7.5 Hz C<sub>py</sub>H(3,5)); 6.50 (t, 1H, <sup>3</sup>J = 7.5 Hz C<sub>py</sub>H(4)); 6.58 (s, 6H, C<sub>arom</sub>H(3,4,5)). 1.86 (s, 6H, NC-CH<sub>3</sub>); 1.40 (s, 12H, CH<sub>3</sub>). <sup>13</sup>C{<sup>1</sup>H}-NMR (100 MHz, C<sub>6</sub>D<sub>6</sub>) δ [ppm] = 150.1 (NC-CH<sub>3</sub>); 147.0 (C<sub>py</sub>(2,6)); 145.6 (C<sub>arom</sub>(1)); 138.9 (C<sub>arom</sub>(2,6)); 128.9 (C<sub>arom</sub>(3,5)); 112.0 (C<sub>py</sub>(4)); 128.9 (C<sub>arom</sub>(4)); 118.7 (C<sub>py</sub>(3,5)); 18.4 (CH<sub>3</sub>); 15.9 (NC-CH<sub>3</sub>). MS (ESI/THF): [m/z] = 1164.6 [(Me<sub>4</sub>N<sub>3</sub>)Ir(μ-N)Ir(Me<sub>4</sub>N<sub>3</sub>)]<sup>-</sup> (100%). EA calculated for C<sub>50</sub>H<sub>54</sub>Ir<sub>2</sub>N<sub>7</sub>Na: C 51.75%; H 4.69%; N 8.45%, found.: C 51.69%; H 4.52%; N 8.48%

## 10. Synthesis of <sup>t</sup>BuIr<sub>2</sub>N<sup>-Na+</sup>

To a solution of 21 mg (19 μmol) <sup>t</sup>BuIr<sub>2</sub>N in 5 ml THF was added a solution of 7 mg

(38  $\mu$ mol) **NaN(SiMe<sub>3</sub>)<sub>2</sub>** in 5 ml THF. The mixture was stirred for 20 min at room temperature, then the solvent was removed in vacuum. After recrystallization from THF/pentane a violet powder was obtained, which was dried in vacuum. Yield: 22 mg (17  $\mu$ mol; 94 %). **<sup>1</sup>H-NMR (300 MHz, THF-*d*<sub>8</sub>):**  $\delta$  [ppm] = 2.14 (s, 6H, NC-CH<sub>3</sub>); 8.30 (s, 2H, C<sub>py</sub>H(3,5)); 6.62 (s, 6H, C<sub>arom</sub>H(3,4,5)); 1.48 (s, 12H, CH<sub>3</sub>); 1.53 (s, 9H, C(CH<sub>3</sub>)<sub>3</sub>). **EA** calculated for C<sub>58</sub>H<sub>70</sub>Ir<sub>2</sub>N<sub>7</sub>Na: C 54.74%; H 5.54%; N 7.70% , found: C 54.03%; H 5.43%; N 8.07%.

## c) X-ray Crystallographic Studies

### General

Crystals of  $\text{Ir}_2\text{N}_3^{+\text{OTf}^-}$ ,  $\text{Ir}_2\text{N}^{+\text{OTf}^-}$ ,  $t\text{BuIr}_2\text{N}^{+\text{BPh}_4^-}$  and  $\text{Ir}_2\text{N}^{-\text{Na}^+}$  suitable for X-ray structural determinations were mounted in polybutene oil on a glass fibre and transferred on the goniometer head to the precooled instrument. Crystallographic measurements were carried out on:

Bruker AXS smart APEX 3-circle single-crystal diffractometer equipped with

- APEX I CCD detector
- molybdenum source Incoatec Microfocus Source I $\mu$ S™ (30 watts, air cooling)
- cryostream nitrogen flow cooling, 100-300 K (Oxford Cryosystems)

SuperNova 4-circle single-crystal diffractometer from Oxford Diffraction

- molybdenum and copper source (dual unit), microfocus tubes
- cryostream-700 plus-nitrogen flow cooling, 100 - 500 K (Oxford Cryosystems)

The structures were solved by direct methods and refined against  $F^2$  by full matrix least squares (SHELX97)<sup>S9</sup> using all unique data. All non-hydrogen atoms were refined with isotropic thermal parameters unless otherwise reported; the carbon bound hydrogen atoms were placed in geometrically calculated positions and refined using a riding model. Molecular graphics were prepared using ORTEP3.<sup>S10</sup> Details of the data collection and refinement are given below.

The asymmetric unit of the crystal structure of complex  $\text{Ir}_2\text{N}_3^{+\text{OTf}^-}$  contains one co-crystallized toluene molecule.

In the asymmetric unit of the crystal structure of complex  $\text{Ir}_2\text{N}^{+\text{OTf}^-}$  the nitrido nitrogen atom N4 is located on special positions (2-fold rotational axis, 2). The OTf has s.o.f. converged at 0.5 (value was checked). Furthermore, the asymmetric unit of the crystal structure of complex  $\text{Ir}_2\text{N}^{+\text{OTf}^-}$  contains 1/4 co-crystallized THF and 1/8 co-crystallized ether molecule on a special position. Both have a s.o.f. of 0.5 and were refined with anisotropic thermal parameters.

The asymmetric unit of the crystal structure of complex  $t\text{BuIr}_2\text{N}^{+\text{BPh}_4^-}$  contains one co-crystallized THF on two sites and a half co-crystallized hexane molecule. Both are disordered and have a s.o.f. of 0.5, which were refined with isotropic thermal parameters. The bond lengths and angles of THF and hexane were restrained to a suitable geometry.

**Table S1:** Selected distances and angles for compounds  $\text{Ir}_2\text{N}_3^{+\text{OTf}^-}$ ,  $\text{Ir}_2\text{N}^{+\text{OTf}^-}$  and  $\text{Ir}_2\text{N}^{-\text{Na}^+}$ .

| ↓ parameter \ compound →                                     | $\text{Ir}_2\text{N}_3^{+\text{OTf}^-}$ | $\text{Ir}_2\text{N}^{+\text{OTf}^-}$ <sup>a</sup> | $\text{Ir}_2\text{N}^{-\text{Na}^+}$ |
|--------------------------------------------------------------|-----------------------------------------|----------------------------------------------------|--------------------------------------|
|                                                              | <b>Ir1</b> <b>Ir2</b>                   | <b>Ir1</b> <b>Ir1<sup>i</sup></b>                  | <b>Ir1</b> <b>Ir2</b>                |
| distances Ir-N <sub>azido,nitrido</sub> [Å]                  | 1.992(7) 1.971(8)                       | 1.8067(3)                                          | 1.8450(23) 1.8380(23)                |
| angle (Ir-N <sub>nitrido</sub> -Ir) [°]                      | -                                       | 167.3(2)                                           | 156.3(1)                             |
| distance C <sub>py</sub> -C <sub>imi</sub> [Å]               |                                         |                                                    |                                      |
| C9-C11    C41-C40                                            | 1.469(12) 1.479(11)                     | 1.4370(33)                                         | 1.4171(41) 1.4154(43)                |
| C15-C16    C34-C36                                           | 1.428(12) 1.463(11)                     | 1.4357(37)                                         | 1.4095(40) 1.3993(41)                |
| distance C <sub>imi</sub> -N <sub>imi</sub> [Å] <sup>b</sup> |                                         |                                                    |                                      |
| N1-C9    N9/7-C41                                            | 1.322(11) 1.299(10)                     | 1.3357(37)                                         | 1.3432(37) 1.3421(37)                |
| N3-C16    N7/5-C34                                           | 1.306(11) 1.322(9)                      | 1.3285(34)                                         | 1.3623(35) 1.3696(37)                |

<sup>a</sup>The N<sub>nitrido</sub> nitrogen atom is located on a special position (2-fold rotational axis).

<sup>b</sup>for labeling see Figures S2, S3 and S5.

**Table S2:** Summary of crystal data and structure refinement<sup>†</sup> for **Ir<sub>2</sub>N<sub>3</sub><sup>+OTf-</sup>**, **Ir<sub>2</sub>N<sup>+OTf-</sup>**, **tBuIr<sub>2</sub>N<sup>+BPh4-</sup>** and **Ir<sub>2</sub>N<sup>-Na+</sup>**.

|                                                                                        | <b>Ir<sub>2</sub>N<sub>3</sub><sup>+OTf-</sup></b>                              | <b>Ir<sub>2</sub>N<sup>+OTf-</sup></b>                                                              | <b>tBuIr<sub>2</sub>N<sup>+BPh4-</sup></b>                                         | <b>Ir<sub>2</sub>N<sup>-Na+</sup></b>                              |
|----------------------------------------------------------------------------------------|---------------------------------------------------------------------------------|-----------------------------------------------------------------------------------------------------|------------------------------------------------------------------------------------|--------------------------------------------------------------------|
| Chemical formula                                                                       | C <sub>58</sub> H <sub>62</sub> Ir <sub>2</sub> N <sub>9</sub> O <sub>3</sub> S | C <sub>54</sub> H <sub>60.5</sub> F <sub>3</sub> Ir <sub>2</sub> N <sub>7</sub> O <sub>3.75</sub> S | C <sub>180</sub> H <sub>202</sub> B <sub>2</sub> Ir <sub>4</sub> N <sub>14</sub> O | C <sub>54</sub> H <sub>62</sub> Ir <sub>2</sub> N <sub>7</sub> ONa |
| Formula Mass                                                                           | 1406.63                                                                         | 1341.05                                                                                             | 3368.11                                                                            | 1232.50                                                            |
| Crystal system                                                                         | monoclinic                                                                      | monoclinic                                                                                          | monoclinic                                                                         | Monoclinic                                                         |
| Space group                                                                            | <i>P</i> 2 <sub>1</sub> /c (Nr. 14)                                             | <i>C</i> 2/c (No.15)                                                                                | <i>P</i> 2 <sub>1</sub> (No.4)                                                     | <i>P</i> 2 <sub>1</sub> /n (No.14)                                 |
| <i>a</i> [Å]                                                                           | 18.049(3)                                                                       | 23.7205(6)                                                                                          | 11.8882(3)                                                                         | 10.693(1)                                                          |
| <i>b</i> [Å]                                                                           | 15.450(3)                                                                       | 15.3311(4)                                                                                          | 23.2366(5)                                                                         | 26.427(2)                                                          |
| <i>c</i> [Å]                                                                           | 20.890(4)                                                                       | 16.5083(4)                                                                                          | 15.1330(3)                                                                         | 16.8108(1)                                                         |
| $\beta$ [°]                                                                            | 97.103(3)                                                                       | 122.479(1)                                                                                          | 95.974(10)                                                                         | 94.351(7)                                                          |
| Unit cell volume [Å <sup>3</sup> ]                                                     | 5780.6(19)                                                                      | 5064.4(2)                                                                                           | 4157.7(2)                                                                          | 4736.8(2)                                                          |
| Temperature [K]                                                                        | 153(2)                                                                          | 100(2)                                                                                              | 100(2)                                                                             | 100(2)                                                             |
| <i>Z</i>                                                                               | 4                                                                               | 2                                                                                                   | 2                                                                                  | 2                                                                  |
| Detector type <sup>†</sup>                                                             | CCD                                                                             | CCD                                                                                                 | CCD                                                                                | CCD                                                                |
| Radiation type                                                                         | MoK $\alpha$                                                                    | MoK $\alpha$                                                                                        | MoK $\alpha$                                                                       | MoK $\alpha$                                                       |
| Reflections measured                                                                   | 61202                                                                           | 63622                                                                                               | 105248                                                                             | 62794                                                              |
| Independent reflections                                                                | 11346                                                                           | 9158                                                                                                | 29402                                                                              | 11211                                                              |
| Ind. reflections ( <i>I</i> > 2 $\sigma$ ( <i>I</i> ))                                 | 6968                                                                            | 7646                                                                                                | 24963                                                                              | 9875                                                               |
| Data/ restraints / parameter                                                           | 11346/2/696                                                                     | 9158/0/375                                                                                          | 29402/8/909                                                                        | 11211/0/598                                                        |
| $\theta_{\max}$ [°] / completeness                                                     | 2.14-26/0.999                                                                   | 2.04-32.5/0.999                                                                                     | 2.04-32.5/0.998                                                                    | 2.88-28/0.98                                                       |
| <i>R</i> <sub>int</sub>                                                                | 0.1442                                                                          | 0.0327                                                                                              | 0.0510                                                                             | 0.0360                                                             |
| Final <i>R</i> <sub>I</sub> values ( <i>I</i> > 2 $\sigma$ ( <i>I</i> ))               | 0.0521                                                                          | 0.0243                                                                                              | 0.0423                                                                             | 0.0220                                                             |
| Final <i>wR</i> ( <i>F</i> <sup>2</sup> ) values ( <i>I</i> > 2 $\sigma$ ( <i>I</i> )) | 0.0850                                                                          | 0.0569                                                                                              | 0.0873                                                                             | 0.0455                                                             |
| Final <i>R</i> <sub>I</sub> values (all data)                                          | 0.1024                                                                          | 0.0342                                                                                              | 0.0570                                                                             | 0.0296                                                             |
| Final <i>wR</i> ( <i>F</i> <sup>2</sup> ) values (all data)                            | 0.0959                                                                          | 0.0638                                                                                              | 0.0980                                                                             | 0.0489                                                             |
| Goodness of fit on <i>F</i> <sup>2</sup>                                               | 0.877                                                                           | 1.116                                                                                               | 1.062                                                                              | 1.059                                                              |
| Max / min $\Delta\rho$ [e Å <sup>-3</sup> ]                                            | -1.641/1.340                                                                    | -0.771/2.511                                                                                        | -1.746/2.235                                                                       | -0.714/1.426                                                       |
| Flack parameter                                                                        | -                                                                               | -                                                                                                   | 0.003                                                                              | -                                                                  |

<sup>†</sup>: see general section above for details

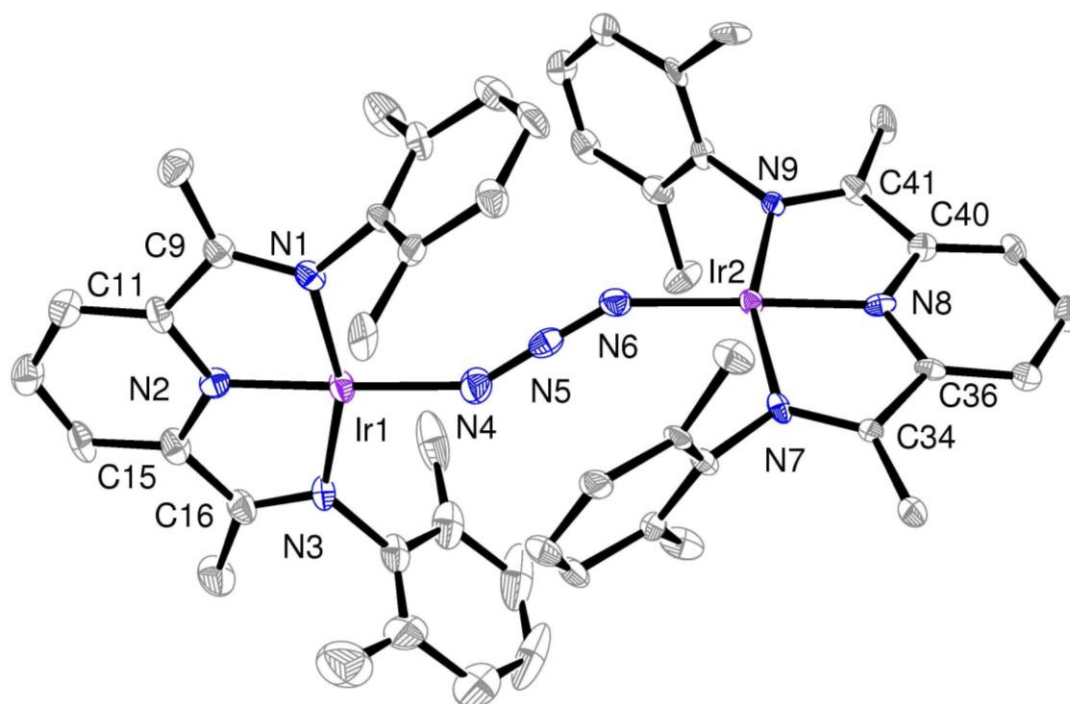

**Figure S2:** Ortep representation of  $\text{Ir}_2\text{N}_3^{+\text{OTf}^-}$  with anisotropic displacement parameters shown at the 50% probability level. Hydrogen atoms and the co-crystallized solvent molecule (toluene) are omitted for clarity. Selected bond lengths [ $\text{\AA}$ ] and angles [ $^\circ$ ] with esd's in parentheses: Ir1-N1 1.972(7), Ir1-N2 1.858(7), Ir1-N3 1.992(7), Ir1-N4 1.956(9), N4-N5 1.204(10), N6-N5 1.175(10), Ir2-N6 1.971(8), Ir2-N7 1.991(7), Ir2-N8 1.867(7), Ir2-N9 2.003(7), N1-C9 1.322(11), C9-C11 1.469(12), N2-C15 1.3879(10), C15-C16 1.428(12), N3-C16 1.306(11), N7-C34 1.322(9), C34-C36 1.463(11), N8-C36 1.343(9), N9-C41 1.299(10), C41-C40 1.479(11), N1-Ir1-N2 79.7(3), N7-Ir2-N8 79.6(3), N3-Ir1-N2 79.3(3), N9-Ir2-N8 79.6(3), N3-Ir1-N4 101.8(3), N7-Ir2-N6 99.9(3), N1-Ir1-N4 99.2(3), N9-Ir2-N6 100.8(3), Ir1-N4-N5 149.0(7), N8-Ir2-N6 178.4(3), N4-N5-N6 178.7(10); Angle between the planes Ir1N1N2N3-Ir2N8N7N9 75.7(2).

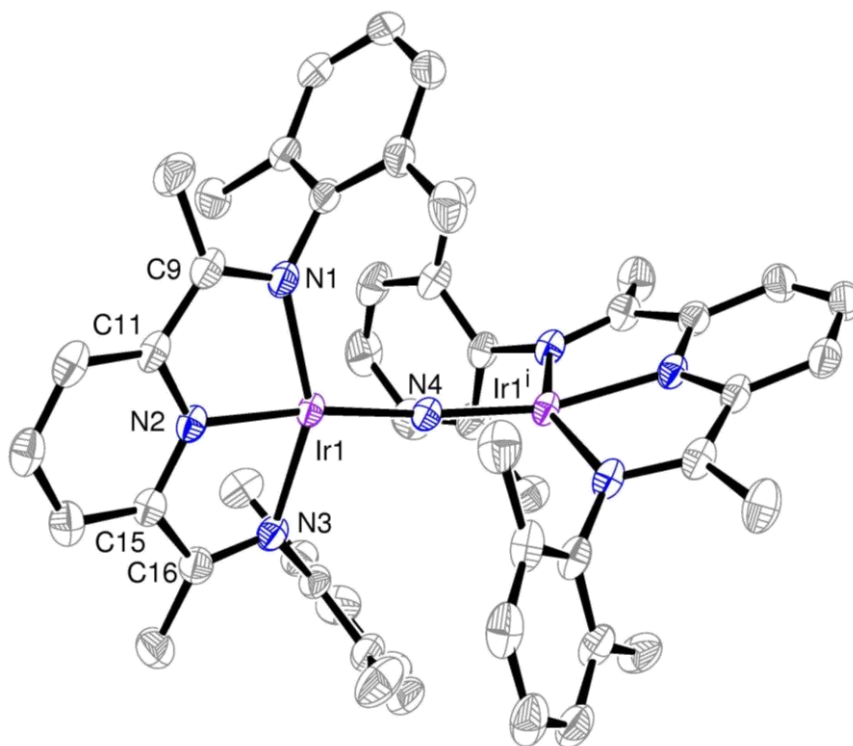

**Figure S3:** Ortep representation of  $\text{Ir}_2\text{N}^{\text{OTf}-}$  with anisotropic displacement parameters shown at the 50% probability level. Hydrogen atoms are omitted for clarity. Selected bond lengths [ $\text{\AA}$ ] and angles [ $^\circ$ ] with esd's in parentheses: Ir1-N1 2.0710(21); Ir1-N2 1.9725(21); Ir1-N3 2.0215(21); Ir1-N4 1.8067(3); Ir1-Ir2 3.59; C9-N1 1.3375(33); C9-C11 1.4370(33); N2-C11 1.3669(31); N2-C15 1.3724(34); C16-C15 1.4357(37); C16-N3 1.3285(34); Ir1-N4-Ir<sup>i</sup> 167.3(2); N2-Ir1-N4 165.8(1); N1-Ir1-N3 151.9(1); N3-Ir1-N4 100.2(1); N1-Ir1-N4 107.7(1); N1-Ir1-N2 77.0(1); N3-Ir1-N2 77.1(1).



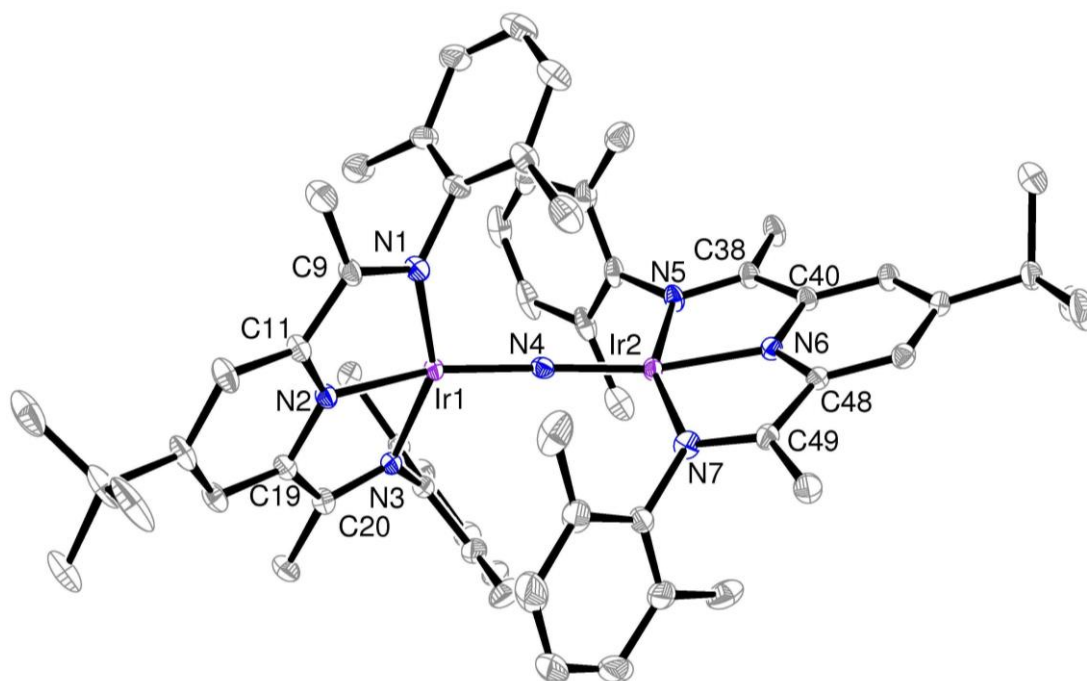

**Figure S4:** Ortep representation of  $^{\text{Bu}}\text{Ir}_2\text{N}^{+\text{BPh}_4-}$  with anisotropic displacement parameters shown at the 50% probability level. Hydrogen atoms and the co-crystallized solvent molecules (THF/hexane) are omitted for clarity. Selected bond lengths [Å] and angles [°] with esd's in parentheses: Ir1-N1 2.0460(41); Ir1-N2 1.9682(40); Ir1-N3 2.0481(43); Ir1-N4 1.7969(44); Ir2-N5 2.0290(40); Ir2-N6 1.9568(39); Ir2-N7 2.0532(38); Ir2-N4 1.7949(45); Ir1-Ir2 3.562; C9-N1 1.3137(63); C9-C11 1.4367(70); N2-C11 1.3680(67); N2-C19 1.3686(61); C19-C20 1.4611(73); C20-N3 1.3321(65); C49-N7 1.3264(66); C49-C48 1.4459(69); N6-C40 1.3733(61); N6-C48 1.3715(66); C38-C40 1.4411(68); C38-N5 1.3403(62); Ir1-N4-Ir2 165.3(3); N2-Ir1-N4 159.5(2); N1-Ir1-N3 152.1(2); N3-Ir1-N4 104.7(2); N1-Ir1-N4 103.2(2); N1-Ir1-N2 77.3(2); N3-Ir1-N2 77.2(2); N5-Ir2-N6 78.0(2); N7-Ir2-N6 77.3(2); N5-Ir2-N4 99.4(2); N7-Ir2-N4 105.6(2); N6-Ir2-N4 168.9(2); N5-Ir2-N7 154.8(2).

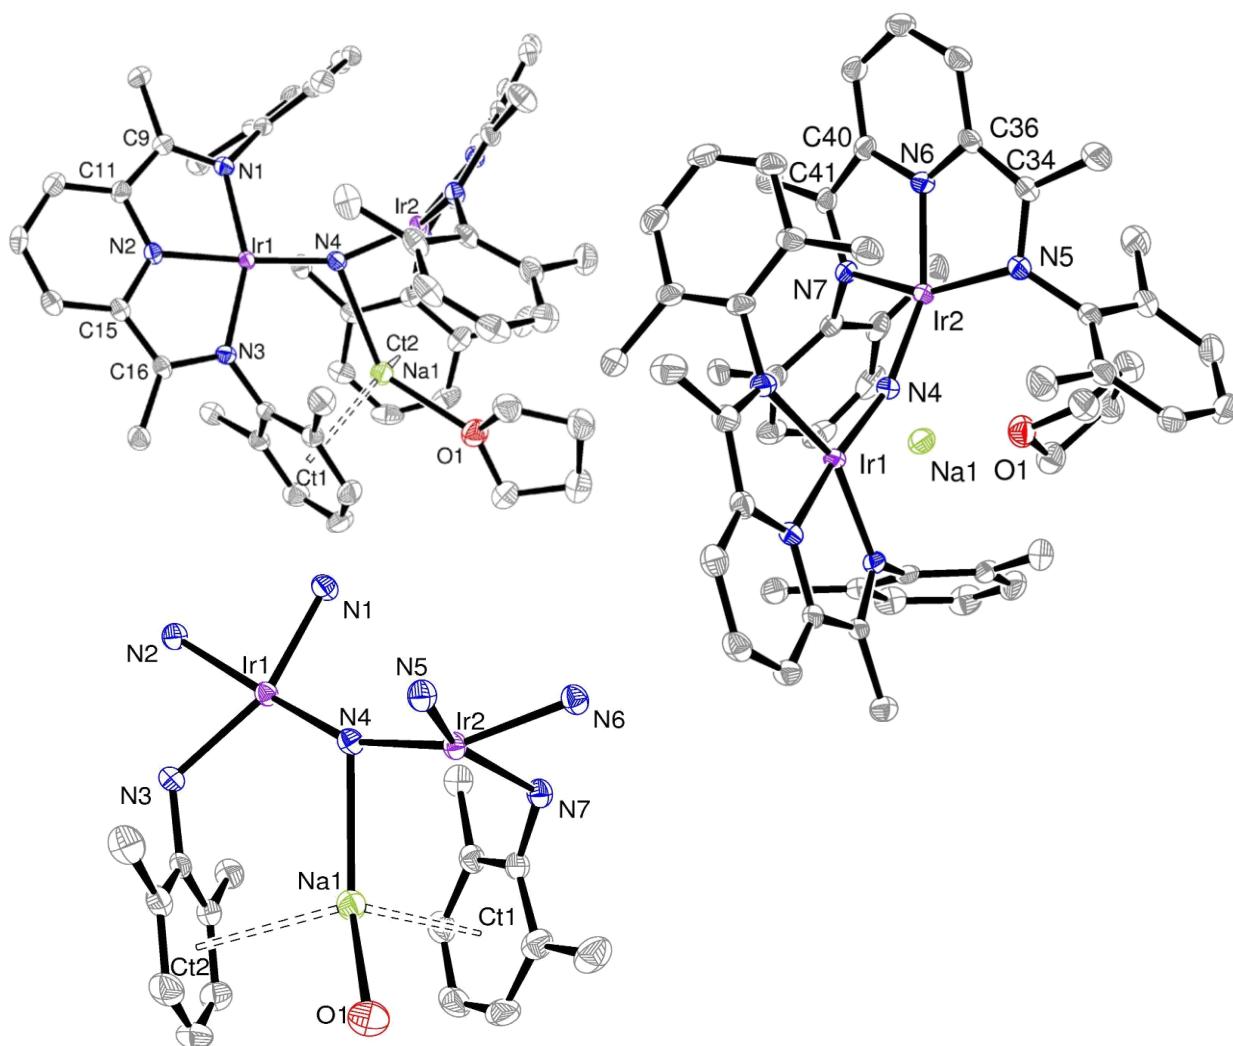

**Figure S5:** Ortep representations (different orientations. top) of  $\text{Ir}_2\text{N}^{\text{Na}+}$  **5** with anisotropic displacement parameters shown at 50% probability level (right; sodium contacts omitted for clarity). The bottom view shows sodium bound positions. Hydrogen atoms are omitted for clarity. Selected bond lengths [Å] and angles [°] with esd's in parentheses: Ir1-N1 2.0382(24); Ir1-N2 1.9366(23); Ir1-N3 2.0111(23); Ir1-N4 1.8450(23); Ir2-N4 1.8380(23); Ir2-N5 2.0250(24); Ir2-N6 1.9340(24); Ir2-N7 2.0250(24); Ir1-Ir2 3.601; Na-N4 2.6102(27); C9-N1 1.3432(37); C9-C11 1.4171(41); N2-C11 1.3928(37); N2-C15 1.4009(36); C16-C15 1.4095(40); C16-N3 1.3623(35); C34-N5 1.3696(37); C34-C36 1.3993(41); N6-C36 1.3955(38); N6-C40 1.3972(37); C40-C41 1.4154(43); C41-N7 1.3421(37); Ir1-N4-Ir2 156.3(1); N2-Ir1-N4 169.9(1); N6-Ir2-N4 152.9(1); N1-Ir1-N3 155.1(1); N5-Ir2-N7 153.6(1); N3-Ir1-N4 103.0(1); N7-Ir2-N4 100.3(1); N1-Ir1-N4 102.0(1); N5-Ir2-N4 106.1(1); N1-Ir1-N2 77.6(1); N5-Ir2-N6 78.5(1); N2-Ir1-N4 170.0(1); N6-Ir2-N4 152.9(1).

#### d) Spectroscopic Characterization

##### UV-vis spectroscopy

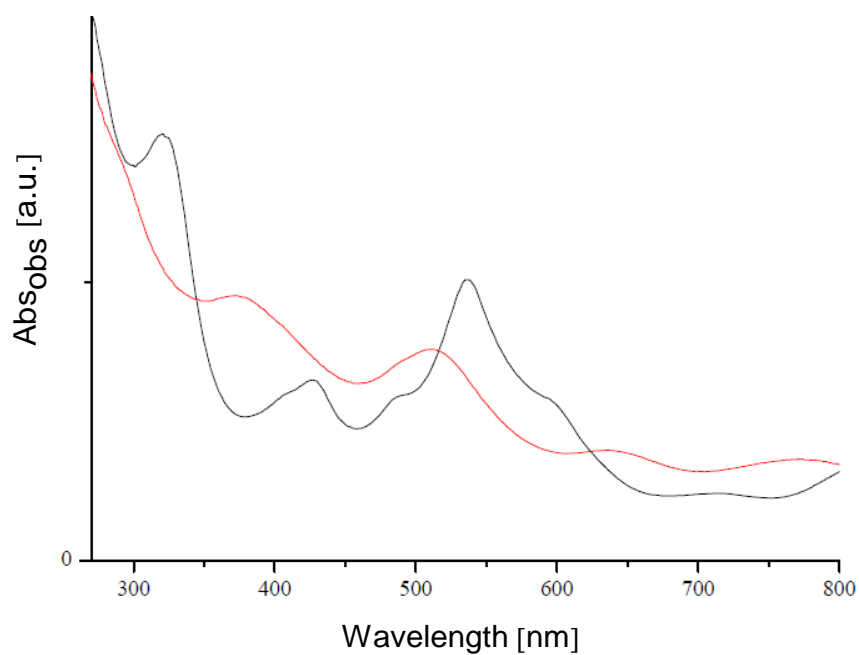

**Figure S6:** UV/vis spectrum (THF) of  $\text{Ir}_2\text{N}_3^{+\text{Al}^-}$  (black line) and  $\text{Ir}_2\text{N}^{+\text{Al}^-}$  (red line).

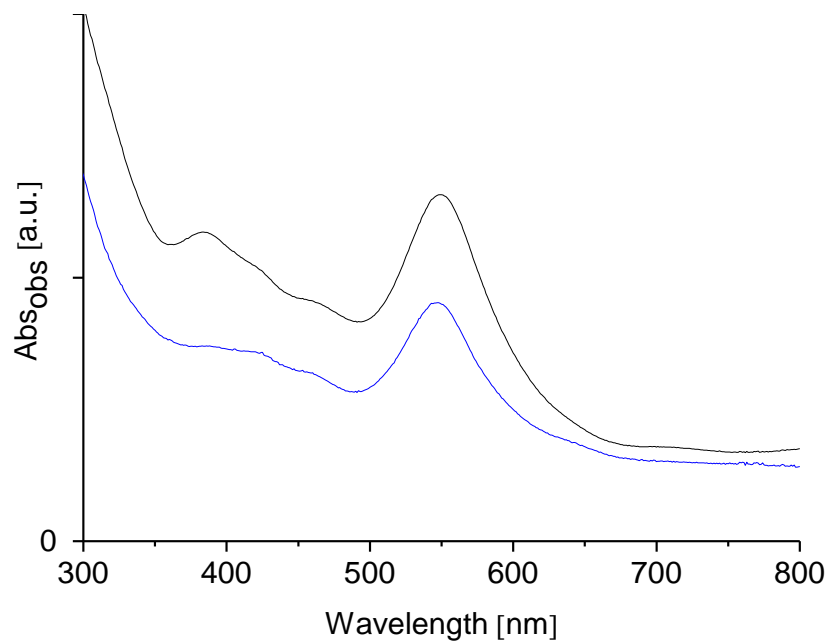

**Figure S7:** UV/vis spectrum (pentane) of  $t\text{BuIr}_2\text{N}$  (blue line) and  $t\text{BuIr}_2\text{N}^{-\text{Na}^+}$  (black line).

# **NMR-Spectra**

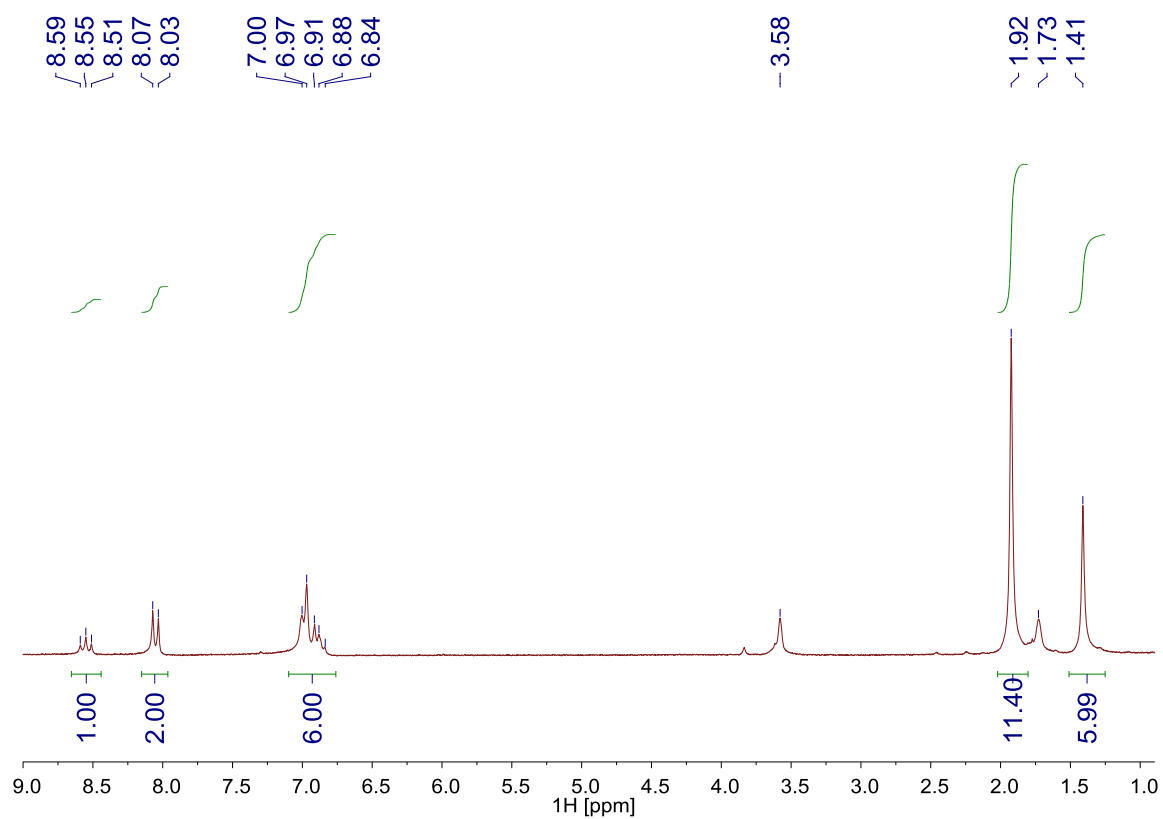

**Figure S8:**  $^1\text{H}$  NMR spectrum (400 MHz, THF- $\text{d}_8$ ) of  $\text{Ir}_2\text{N}_3^{+\text{OTf}^-}$ .

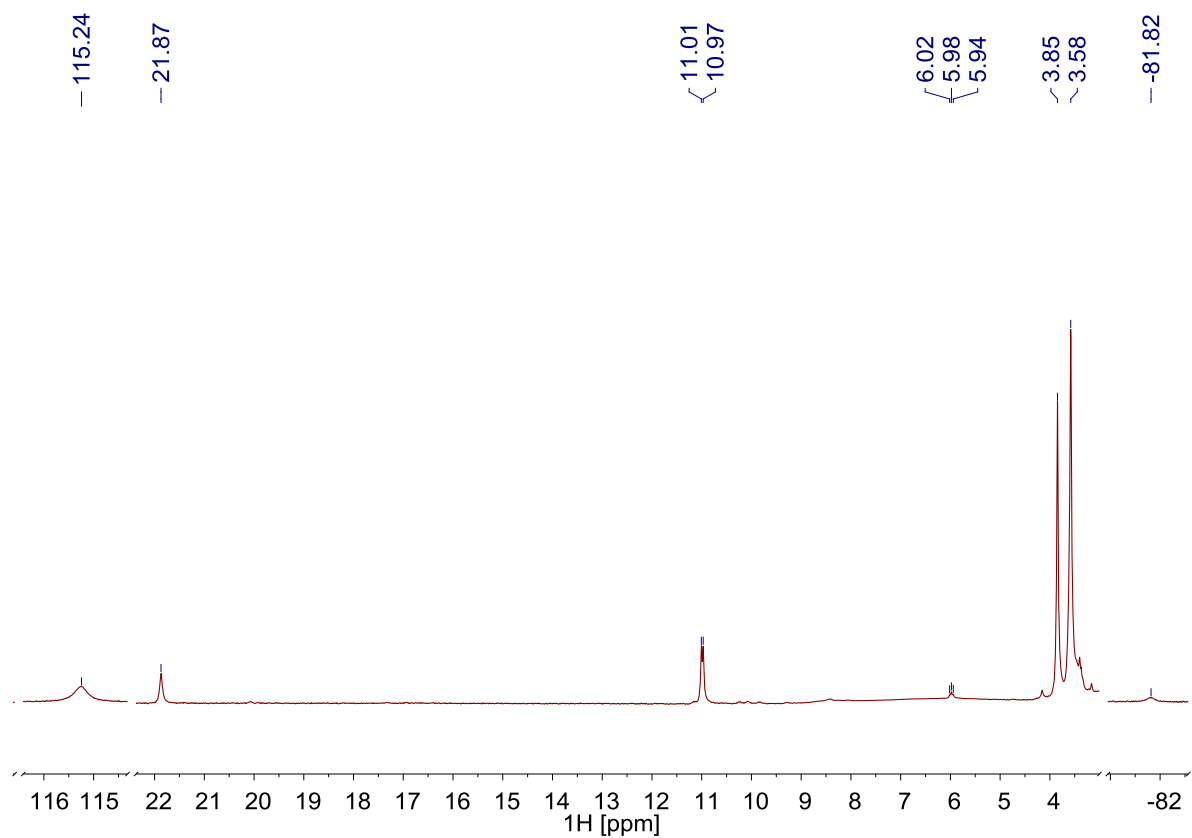

**Figure S9:**  $^1\text{H}$  NMR spectrum (400 MHz, RT, THF- $\text{d}_8$ ) of  $\text{Ir}_2\text{N}^{+\text{OTf}^-}$ .

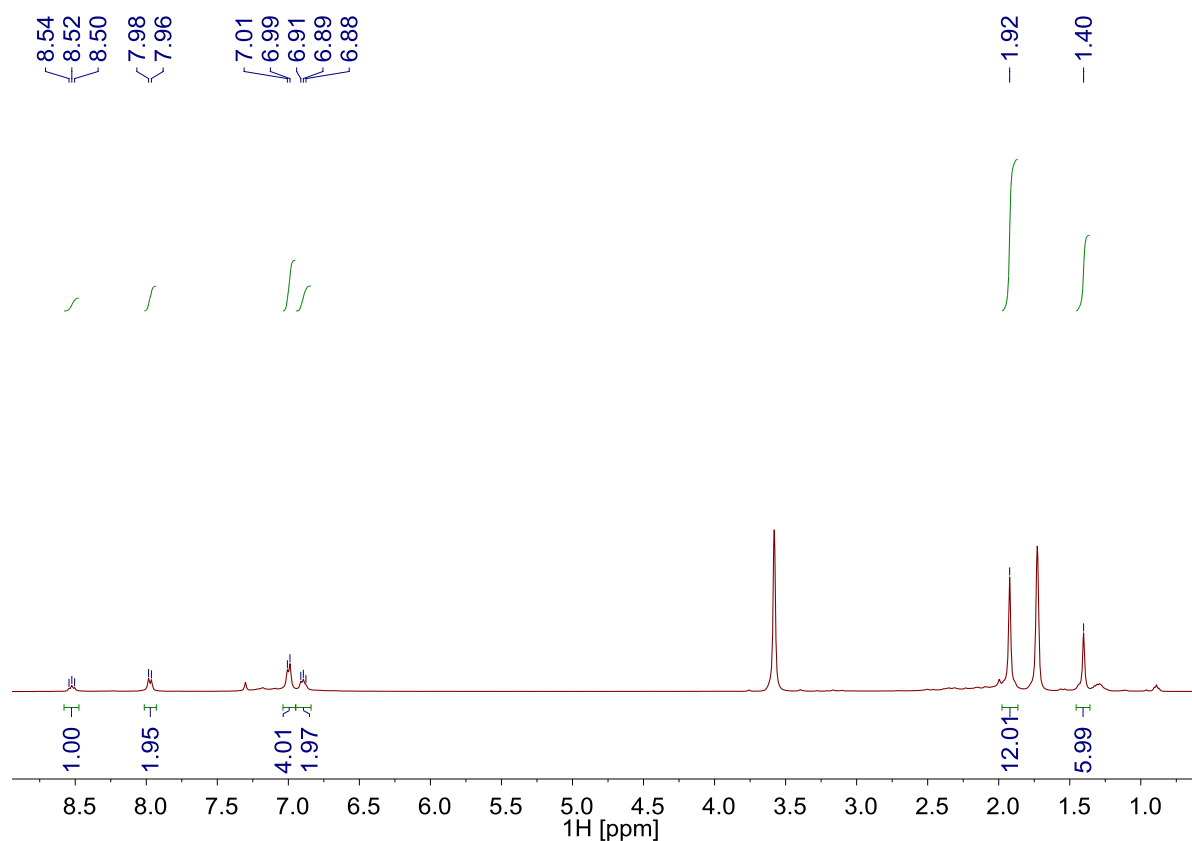

**Figure S10:**  $^1\text{H}$  NMR spectrum (400 MHz; THF- $\text{d}_8$ ) of  $\text{Ir}_2\text{N}_3^{+\text{Al}^-}$ .

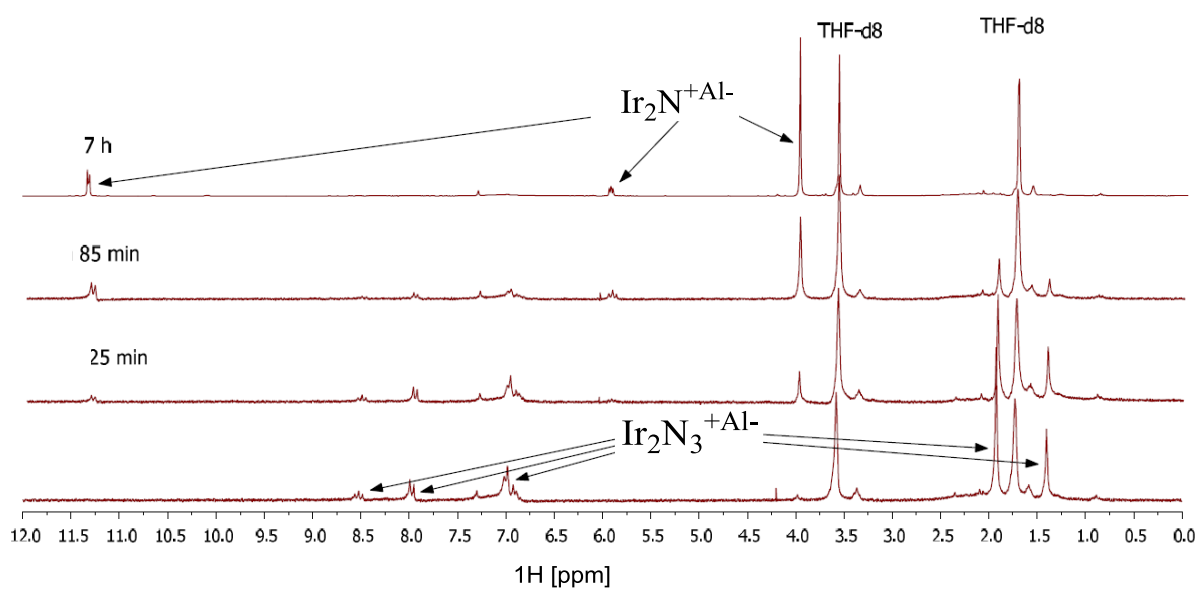

**Figure S11:**  $^1\text{H}$  NMR spectrum (400 MHz, RT THF- $\text{d}_8$ ) after 25 min, 85 min, 7 h photolysis with blue light:  $\text{Ir}_2\text{N}_3^{+\text{Al}^-} \rightarrow \text{Ir}_2\text{N}^{+\text{Al}^-}$ .

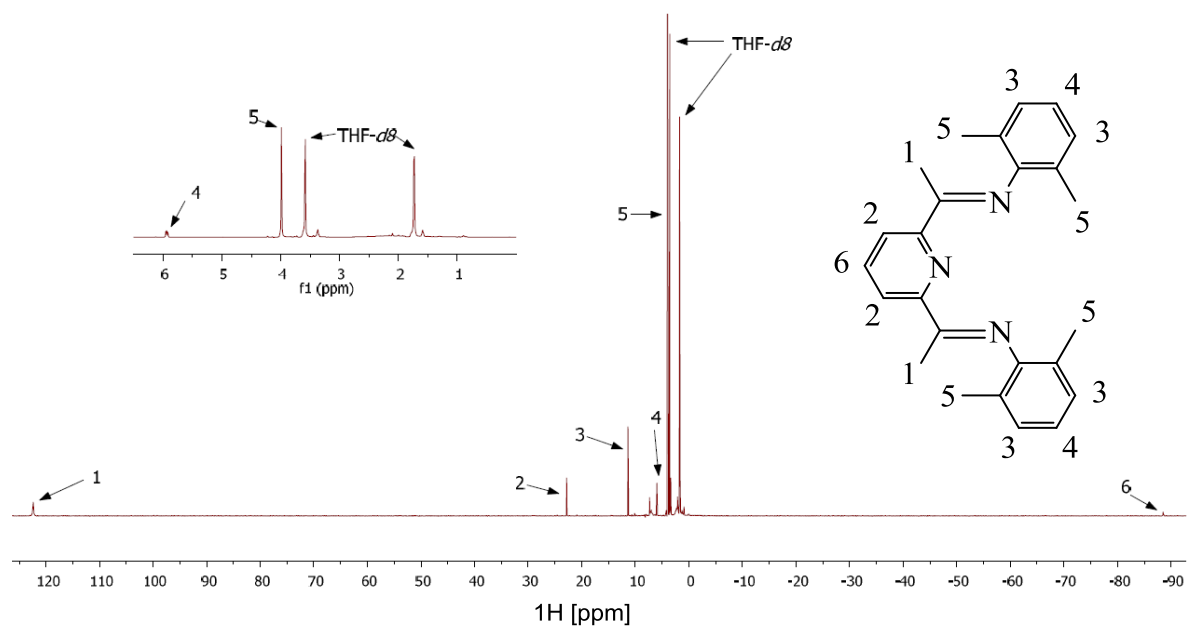

**Figure S12:**  $^1\text{H}$ -NMR (400 MHz;  $\text{THF-d}_8$ ) of  $\text{Ir}_2\text{N}^{+\text{Al-}}$  at RT.

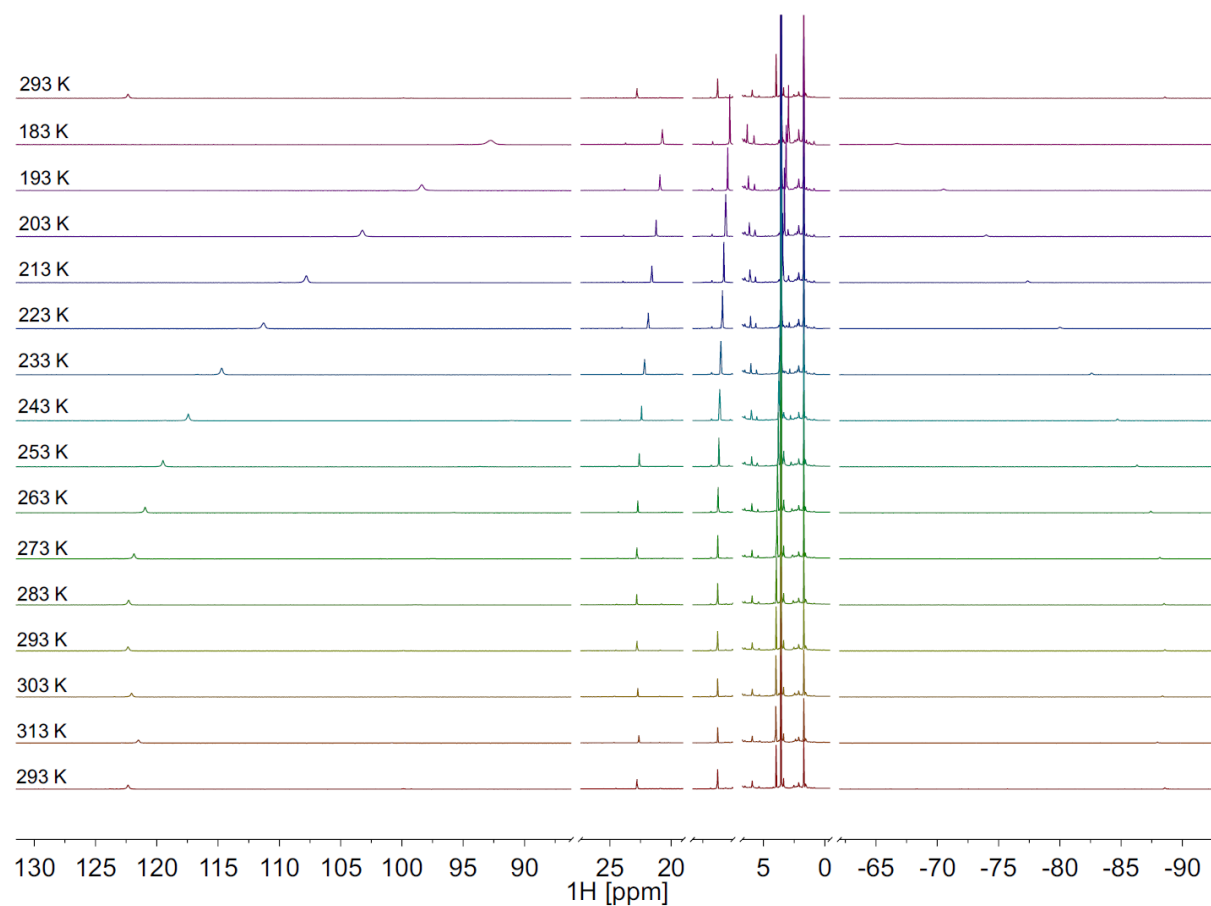

**Figure S13:** vt  $^1\text{H}$ -NMR spectrum (400 MHz;  $\text{THF-d}_8$ ) of  $\text{Ir}_2\text{N}^{+\text{Al-}}$  in the temperature range between 183 K and 313 K.

**Table S3:**  $\nu T$   $^1\text{H}$ -NMR shifts ( $\delta$  [ppm]) of  $\text{Ir}_2\text{N}^{+\text{Al-}}$  between 183 K and 313 K.

| T [K] | H1 (12H) | H2 (4H) | H3 (8 H) | H4 (4 H) | H5 (24 H) | H6 (2 H) |
|-------|----------|---------|----------|----------|-----------|----------|
| 183   | 92.72    | 20.74   | 10.31    | 6.35     | 2.97      | -66.72   |
| 193   | 98.41    | 20.94   | 10.49    | 6.25     | 3.17      | -70.51   |
| 203   | 103.26   | 21.25   | 10.67    | 6.18     | 3.32      | -74.00   |
| 213   | 107.83   | 21.60   | 10.81    | 6.13     | 3.46      | -77.31   |
| 223   | 111.31   | 21.89   | 10.92    | 6.08     | 3.58      | -79.97   |
| 233   | 114.73   | 22.19   | 11.04    | 6.04     | 3.66      | -82.59   |
| 243   | 117.45   | 22.44   | 11.14    | 6.01     | 3.75      | -84.67   |
| 253   | 119.51   | 22.62   | 11.21    | 5.99     | 3.82      | -86.27   |
| 263   | 120.97   | 22.74   | 11.26    | 5.96     | 3.88      | -87.41   |
| 273   | 121.87   | 22.80   | 11.29    | 5.95     | 3.92      | -88.13   |
| 283   | 122.31   | 22.82   | 11.31    | 5.94     | 3.96      | -88.50   |
| 293   | 122.36   | 22.80   | 11.32    | 5.93     | 3.98      | -88.55   |
| 303   | 122.06   | 22.74   | 11.31    | 5.93     | 4.00      | -88.34   |
| 313   | 121.51   | 22.65   | 11.28    | 5.92     | 4.01      | -87.95   |

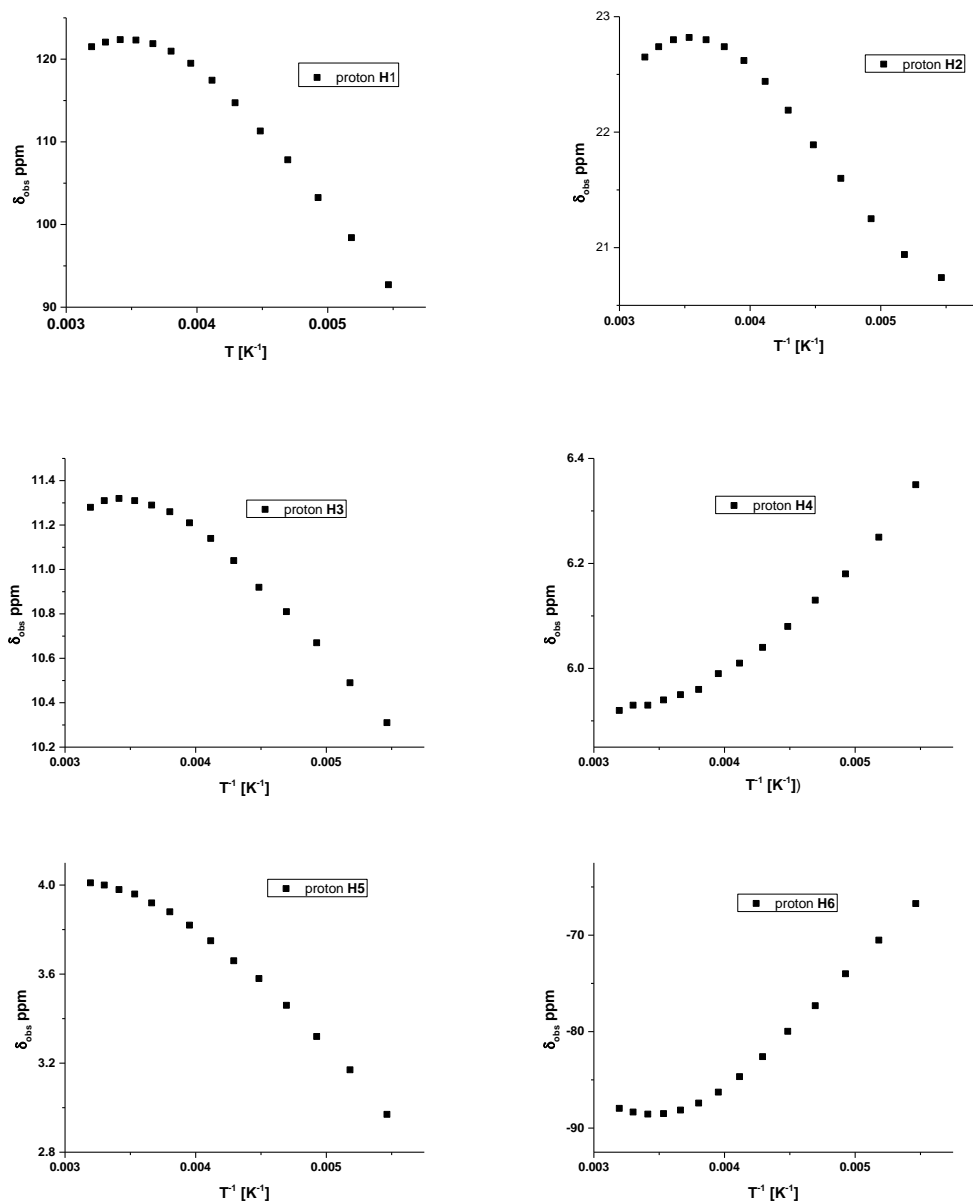

**Fig. S14.** Non-linear Curie-Weiss dependence of the  $^1\text{H}$ -NMR resonances for the protons in complex  $\text{Ir}_2\text{N}^{+\text{Al}^-}$ .



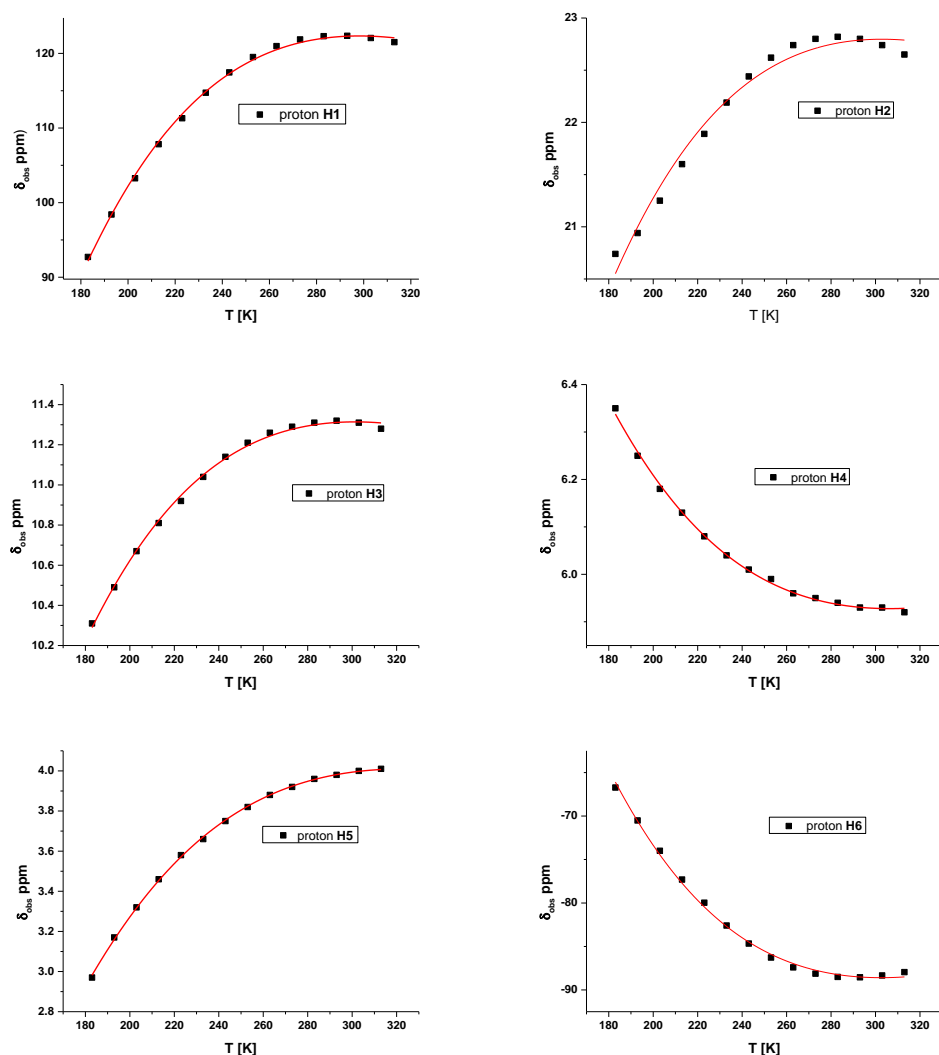

**Fig. S15.** Fits to the Van-Vleck equation ( $S=1 \rightleftharpoons S=0$ ) of the  $^1\text{H}$ -NMR shifts in  $\text{Ir}_2\text{N}^{+\text{Al}}$ .

The plots of the temperature dependent  $^1\text{H}$  NMR resonances of complex  $\text{Ir}_2\text{N}^{+\text{Al}}$  presented in Fig. S16 were fitted to a  $S=0 \rightleftharpoons S=1$  spin equilibrium using the equation developed by Horrocks<sup>S11</sup> et al., which is shown below. The fitting curves are presented as red lines in Fig. S15.

$$H_{\text{obs}} = H_{\text{dia}} + \frac{H_{\text{O}} \cdot A \cdot g \cdot \beta \cdot (6 \cdot e^{-E/kT})}{(\gamma_{\text{H}}/2\pi) \cdot 3 \cdot k \cdot T \cdot (1 + 3 \cdot e^{-E/kT})}$$

$H_{\text{obs}}$  and  $H_{\text{dia}}$  correspond to the observed and diamagnetic chemical shift ( $S=0$ ),  $\gamma_{\text{e}}$  and  $\gamma_{\text{H}}$  are the gyromagnetic ratios of the electron and proton,  $\beta$  is the Bohr magneton,  $k$  is the Boltzmann constant,  $g$  is the g-factor of the unpaired electron,  $A$  is the hyperfine splitting constant of the observed proton,  $E$  is the singlet $\rightarrow$ triplet energy gap; a value of  $R \ln 3$  corresponding to the electronic contribution for the entropy change is incorporated.

It has to be stressed that this treatment is only appropriate if the observed paramagnetic shifts can be solely attributed to a *contact-shift*, i.e., *through bond* term. This assumption was justified by the  $^1\text{H}$  NMR resonances of a derivative of complex  $\text{Ir}_2\text{N}^{+\text{Al}}$ , which carried a mesityl

rather than a 2,6-Me<sub>2</sub>-phenyl (ortho xylyl) substituent of the ketimine group. As anticipated for a contact-shift mechanism, the sign of the hyperfine splitting for the protons in the para position of the phenyl ring changed due to the incorporation of one further bond in the methyl substituted (mesityl) derivative.

With  $\gamma_e = -8.9412 \cdot 10^{10} \text{ 1/Ts}$ ,  $\gamma_H = 4.78943 \cdot 10^7 \text{ 1/Ts}$ ,  $g = 2.00232$ ,  $\beta = 9.27402 \cdot 10^{-24} \text{ J/T}$ ,  $k = 1.38066 \cdot 10^{-23} \text{ J/K}$ ,  $\delta = (H-H(0))/H(0)$ ,  $A \text{ (T)}$ ,  $H \text{ (J/mol)}$  and  $T \text{ in K}$

$$\delta_{\text{observed}} = \delta_{\text{dia}} - 10^6 \cdot 823.194 \cdot A / (T \cdot (1 + \exp((\Delta H - T \cdot 9.134) / (8.31451 \cdot T))))$$

is obtained, which was used for the non-linear curve fit using the commercial Origin program (ver. 9.0) package for the vT dependent <sup>1</sup>H NMR shifts shown in Fig. S16. The free fitting variables are  $\delta_{\text{dia}}$ ,  $A$  and  $\Delta H$ .

The obtained fitting parameters are compiled in Table S3. The values derived for  $\Delta H$  from the fits of the six independent <sup>1</sup>H NMR resonances H1 – H6 lie in a reasonably narrow range of 3975 – 4311 J/mol with an average value  $\Delta H_{\text{average}} = 4075 \text{ kJ/mol}$  ( $341 \text{ cm}^{-1}$ ). The fits for the diamagnetic chemical shifts  $\delta_{\text{dia}}$  seem reasonable for protons H3-H6, for the methyl protons H1 the fitted parameters of  $\delta_{\text{dia}} = -15 \text{ ppm}$  deviates strongly from the anticipated value of  $\delta_{\text{dia}}$  in the range (1-2 ppm.) This holds also to some extent for the meta-pyridine protons H2, for which  $\delta_{\text{dia}}$  converged at 13 ppm and proton H6, which displays a large standard deviation for  $\delta_{\text{dia}}$ . Some problems with the fits for these protons can be envisaged through inspection of the deviations of the fitting curves and the measured data in Fig. S15. This can be in parts attributed to the very broad signals for protons H1, H2 and H6, which leads to significant errors for the determination of their chemical shifts; it should be noted that the line broadening of these signals is also strongly temperature dependent. When the parameters for H1, H2 and H6 were constrained to their anticipated diamagnetic values in the non-linear curve fit,  $\Delta H$  remained essentially unchanged at  $\sim 4000 \text{ J/mol}$ , while notable changes were observed for the hyperfine splitting constants in these cases.

**Table S3. Fit to the Van-Vleck equation for a  $S=0 \rightleftharpoons S1$  equilibrium.**

| Proton    | $\delta_{\text{dia}}$ (ppm) | $A$ (MHz)     | $\Delta H$ (J/mol) |
|-----------|-----------------------------|---------------|--------------------|
| <b>H1</b> | -15 ( $\pm 5$ )             | -130 $\pm$ 4) | 3975 ( $\pm 33$ )  |
| <b>H2</b> | 13 ( $\pm 1$ )              | -9 $\pm$ 1    | 4037( $\pm 128$ )  |
| <b>H3</b> | 6.8( $\pm 0.2$ )            | -4 $\pm$ 0    | 4017( $\pm 42$ )   |
| <b>H4</b> | 7.6( $\pm 0.1$ )            | 2 $\pm$ 0     | 4086( $\pm 45$ )   |
| <b>H5</b> | 0.5( $\pm 0.1$ )            | 4 $\pm$ 0     | 4311( $\pm 27$ )   |
| <b>H6</b> | 8.3( $\pm 4.9$ )            | 95 $\pm$ 0    | 4033 ( $\pm 48$ )  |

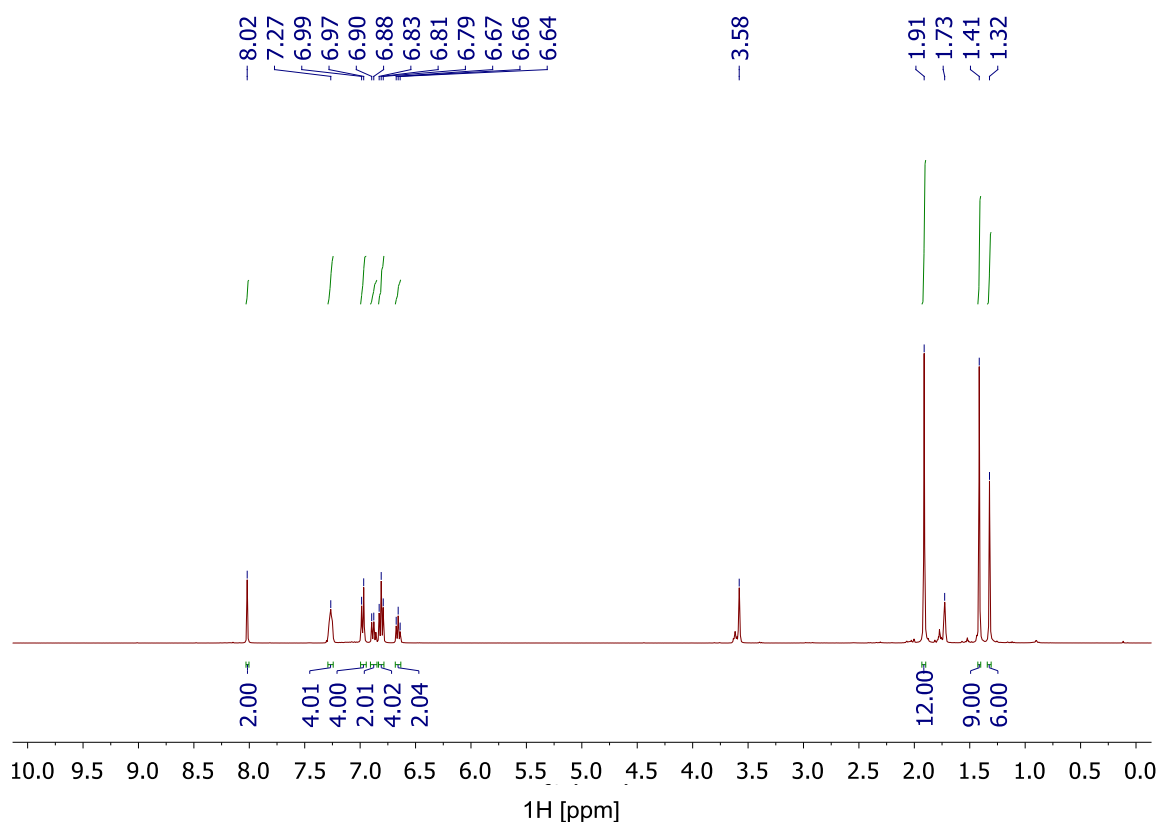

**Figure S16:** <sup>1</sup>H NMR spectrum (400 MHz; THF-d<sub>8</sub>) of *t*BuIr<sub>2</sub>N<sub>3</sub><sup>+</sup>BPh<sub>4</sub><sup>-</sup>.

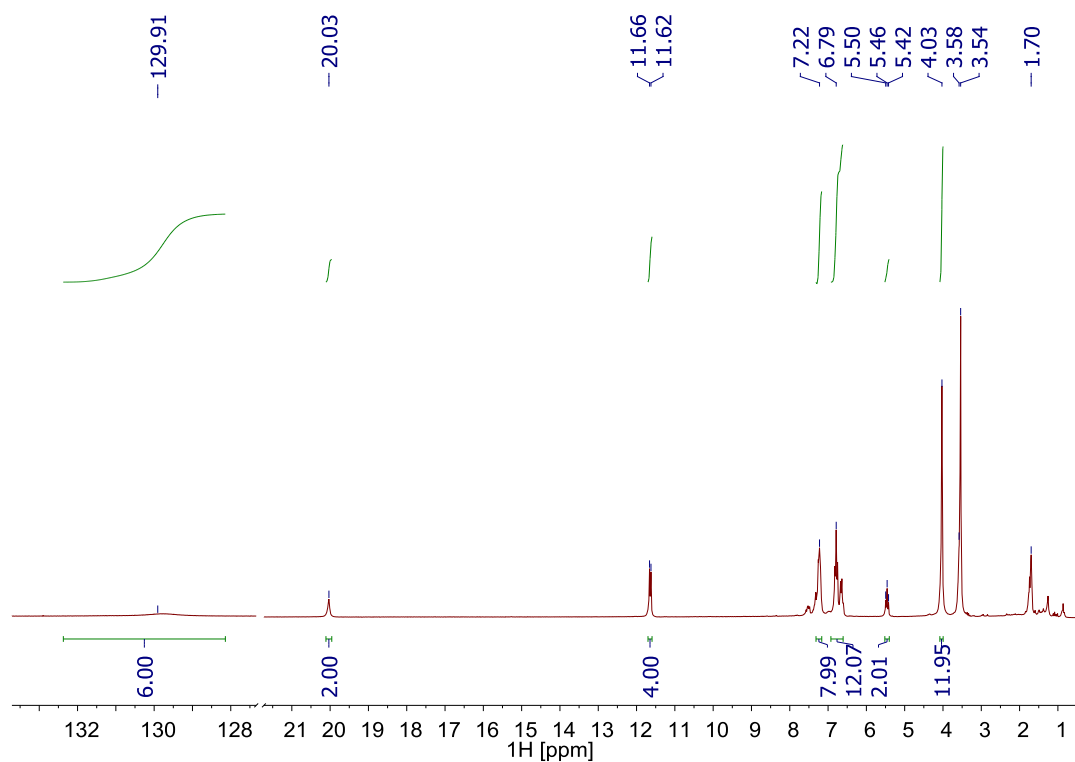

**Figure S17:** <sup>1</sup>H NMR spectrum (400 MHz, RT, THF-d<sub>8</sub>) of *t*BuIr<sub>2</sub>N<sup>+</sup>BPh<sub>4</sub><sup>-</sup>.

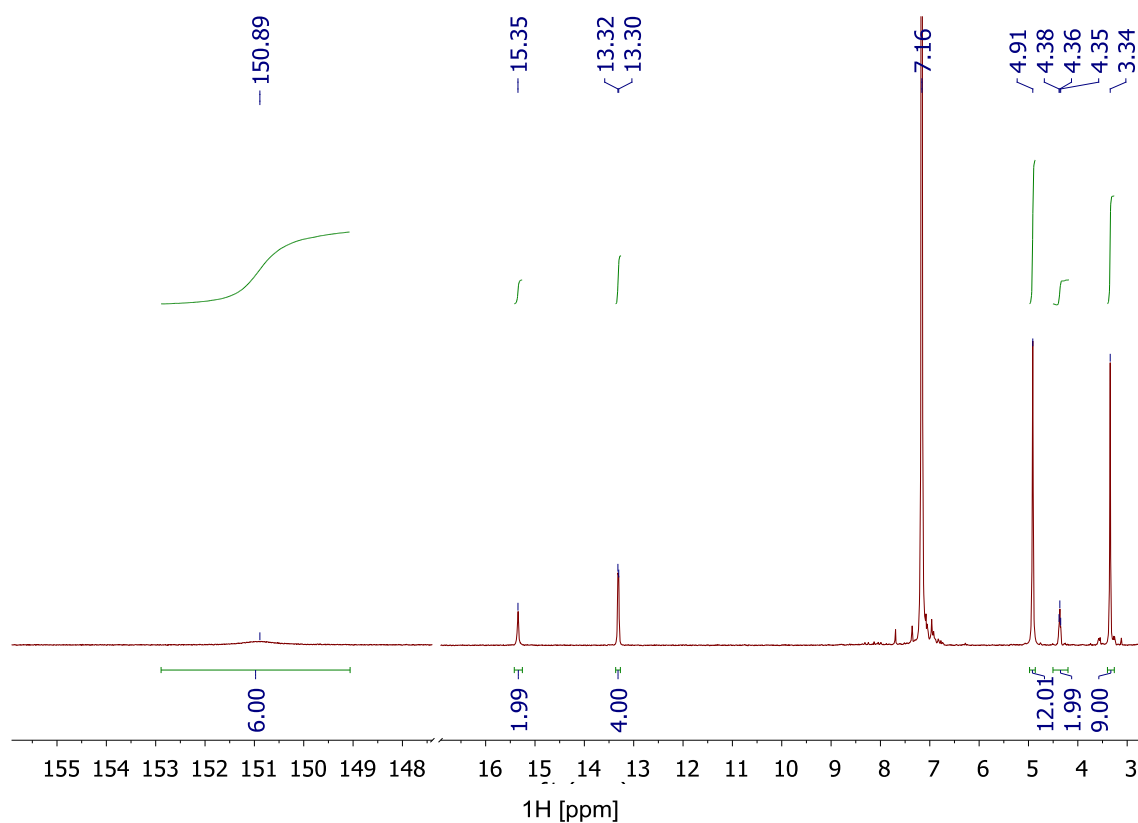

**Figure S18:**  $^1\text{H}$  NMR spectrum (400 MHz, RT,  $\text{C}_6\text{D}_6$ ) of  $t\text{BuIr}_2\text{N}$ .

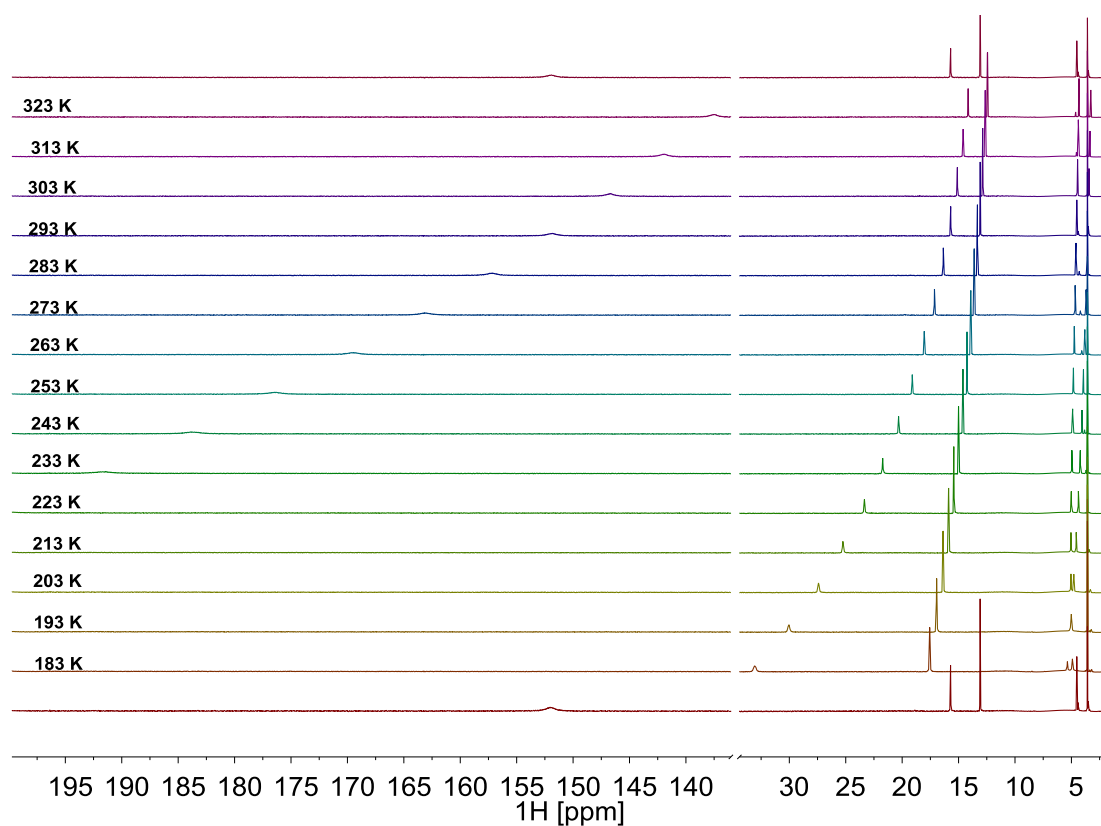

**Figure S19:** vT  $^1\text{H}$ -NMR spectrum (400 MHz;  $\text{THF-d}_8$ ) of  $t\text{BuIr}_2\text{N}$  in the temperature range of 183 – 323 K.

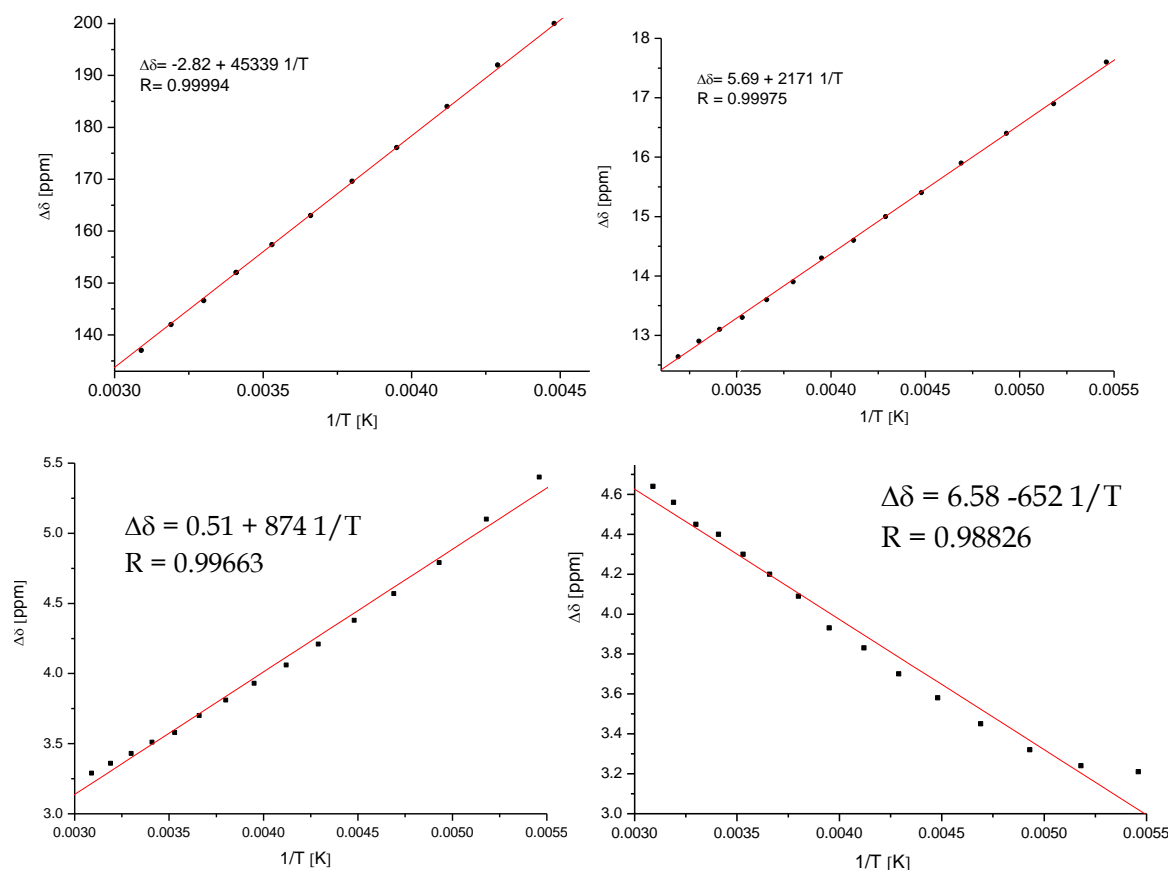

**Figure S20:** Curie-Weiss plots ( $\Delta\delta$  [ppm]) vs  $1/T$  [1/K]) for  $t\text{BuIr}_2\text{N}$  in  $\text{THF-d}_8$ . Linear dependence of the  $^1\text{H}$  NMR shifts on reciprocal temperature for resonances at  $\delta = 151.22$  ppm, 15.62 ppm, 13.09 ppm and 4.39 ppm at RT. The signals at  $\delta = 4.52$  ppm and 3.52 ppm are overlapped by the resonances of the THF solvent.

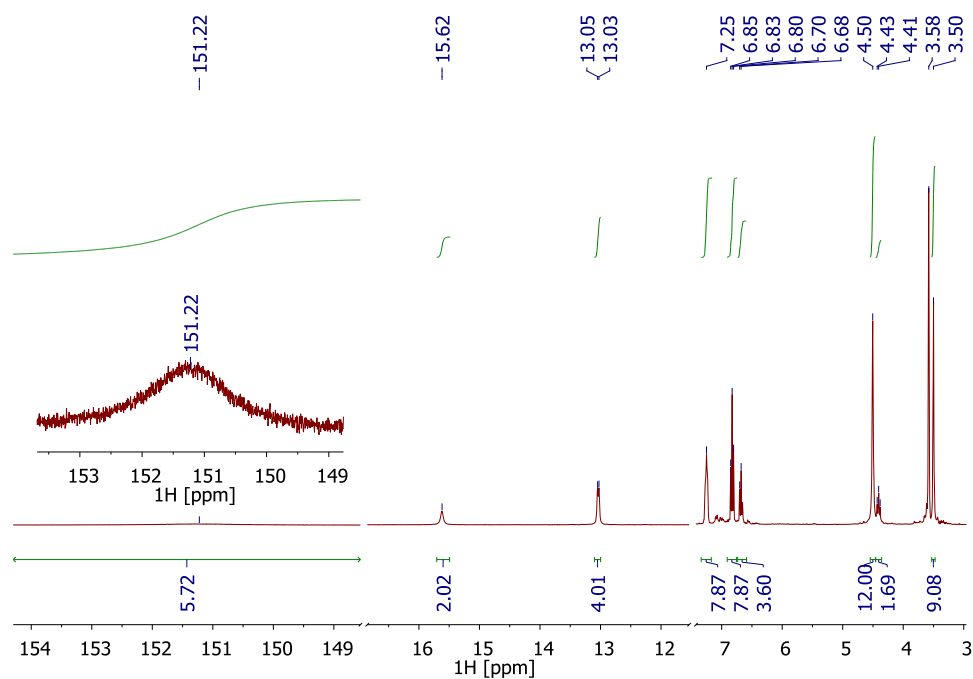

**Figure S21:**  $^1\text{H}$  NMR spectrum (400 MHz, RT,  $\text{THF-d}_8$ ) of the comproportionation reaction  $t\text{BuIr}_2\text{N}^+\text{BPh}_4^- + t\text{BuIr}_2\text{N}^-\text{Na}^+ \rightarrow t\text{BuIr}_2\text{N}$ .

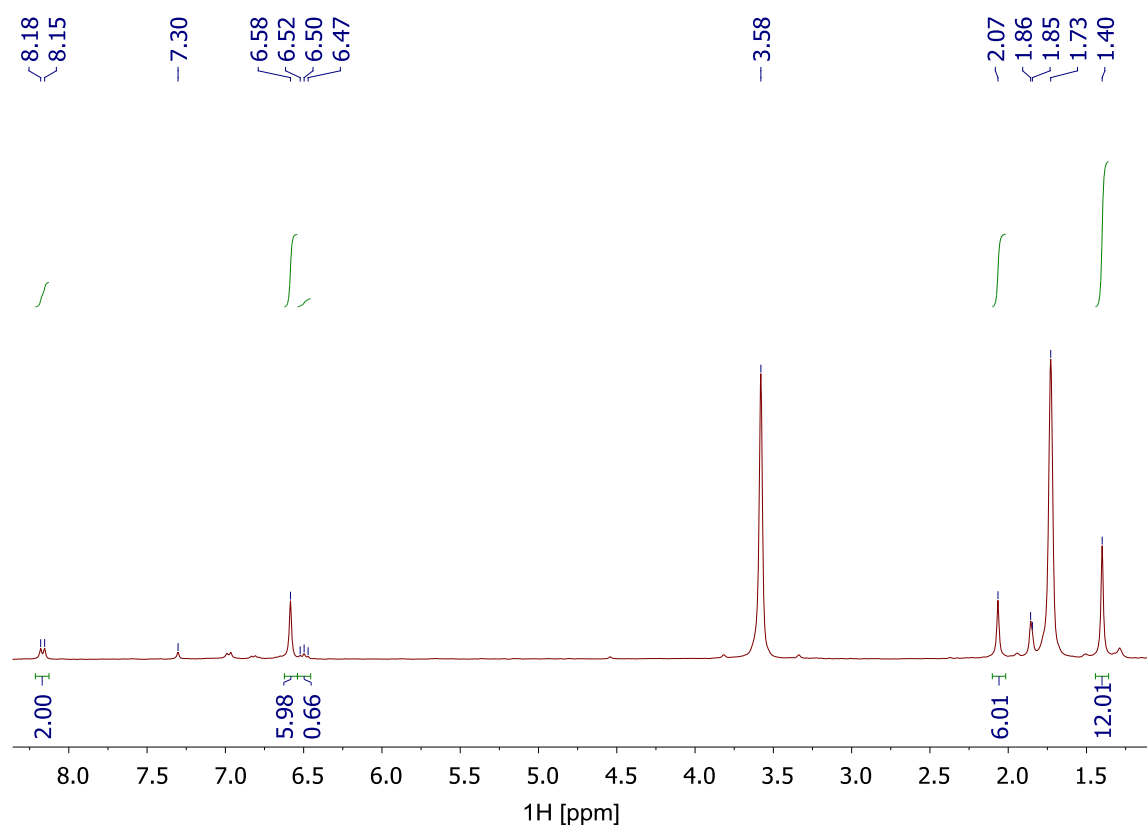

**Figure S22:** <sup>1</sup>H NMR spectrum (400 MHz; THF-d<sub>8</sub>) of Ir<sub>2</sub>N<sup>-</sup>Na<sup>+</sup>.

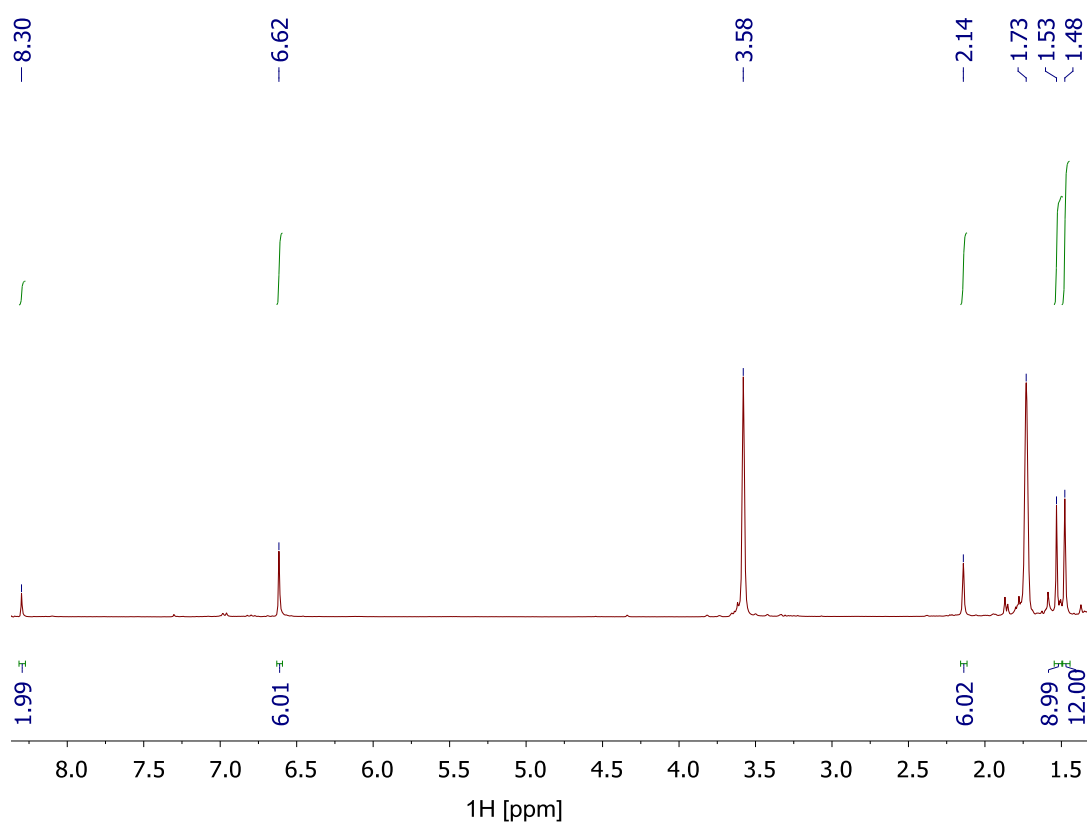

**Figure S23:** <sup>1</sup>H NMR spectrum (400 MHz; THF-d<sub>8</sub>) of *t*BuIr<sub>2</sub>N<sup>-</sup>Na<sup>+</sup>.

# Thermoanalysis: DTA/DTG/MS

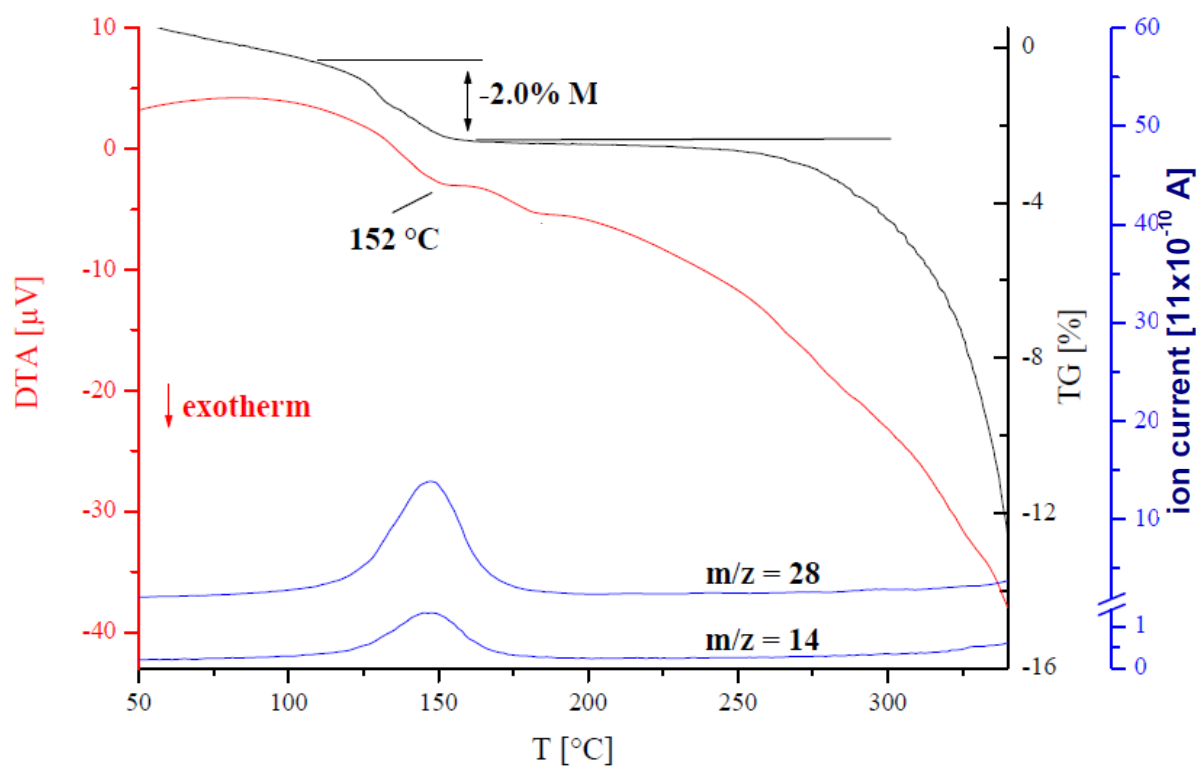

**Figure S24:** DTA- and DTG-MS (heating rate 10K/min) for  $\text{Ir}_2\text{N}_3^{+\text{Al}-}$  (2% weight loss measured; calculated 2.1% for loss of  $\text{N}_2$ ; see MS trace:  $m/z = 28$  and  $m/z = 14$ )

# IR-Spectra

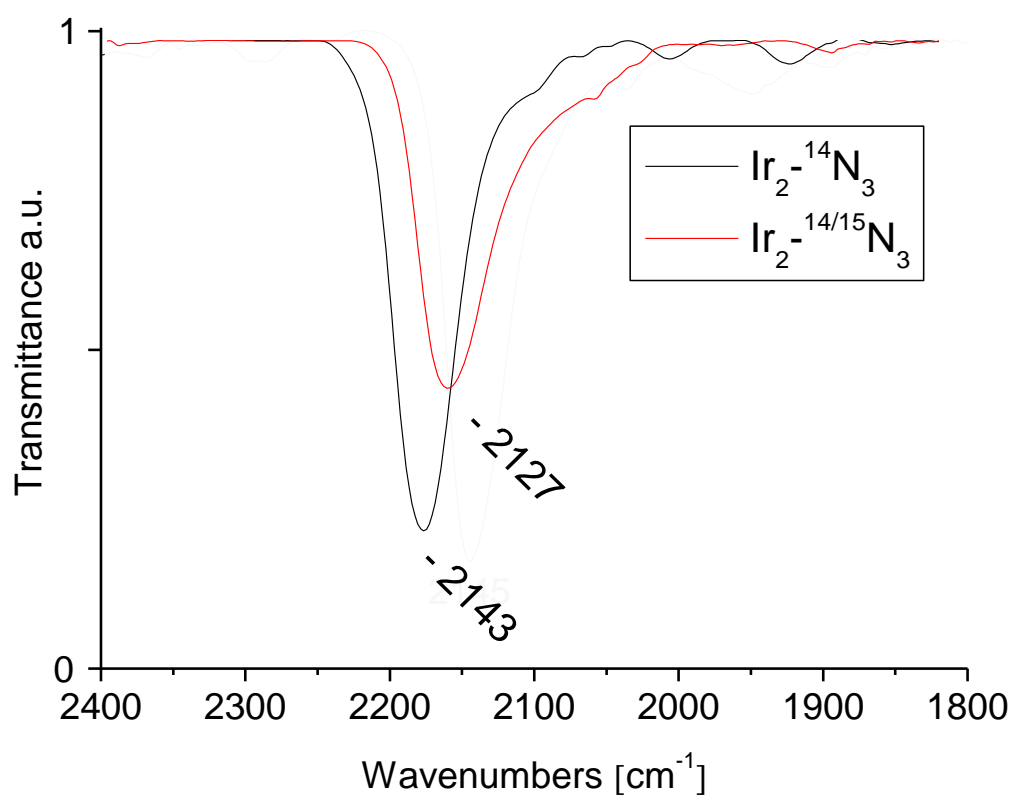

**Figure S25:** IR spectrum (KBr) of  $^t\text{Bu-Ir}_2\text{N}_3^{+\text{BPh}_4^-}$  (black) and its  $^{15}\text{N}$  isotopologue:  $\text{Ir-}^{14}\text{N-}^{14}\text{N-}^{15}\text{N-Ir}^{+\text{BPh}_4^-}$  (red).



### Cyclic voltammogram

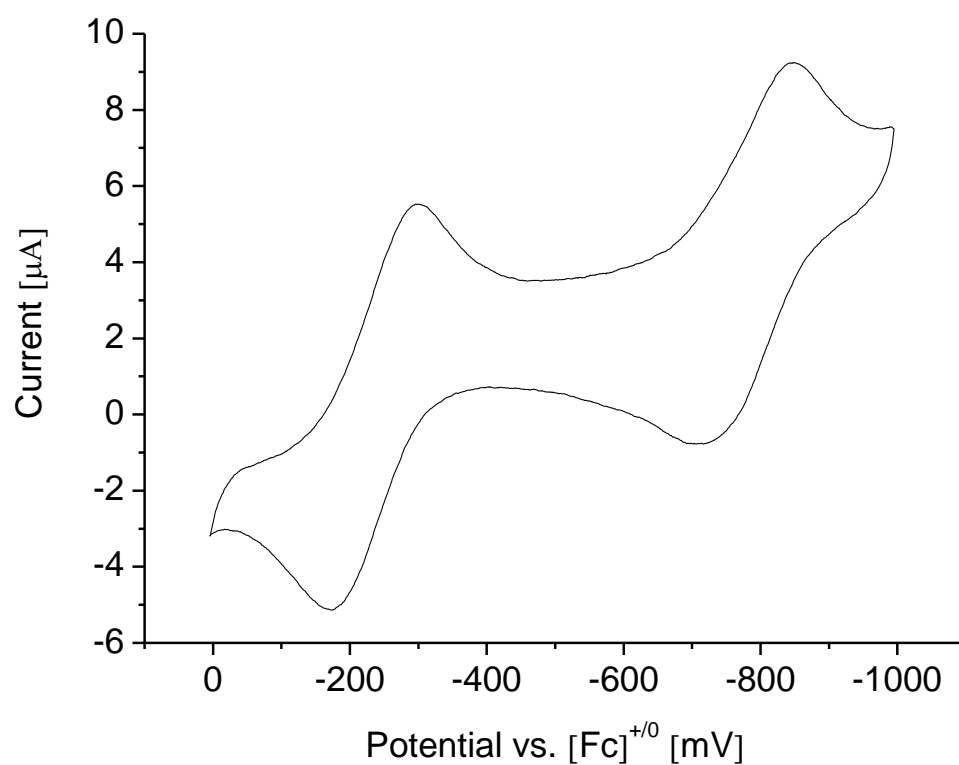

**Figure S26:** Cyclic voltammogram for complex  $^t\text{BuIr}_2\text{N}^{+\text{BP}4-}$  [0.3 mM] in THF vs  $[\text{Cp}_2\text{Fe}]^{+/0}$  at a scan rate of  $100 \text{ mVs}^{-1}$ , GC (glassy carbon) disk electrode (diameter = 3.0 mm) in 1 M  $\text{NBu}_4\text{PF}_6$  THF solution.

## EPR-Spectra

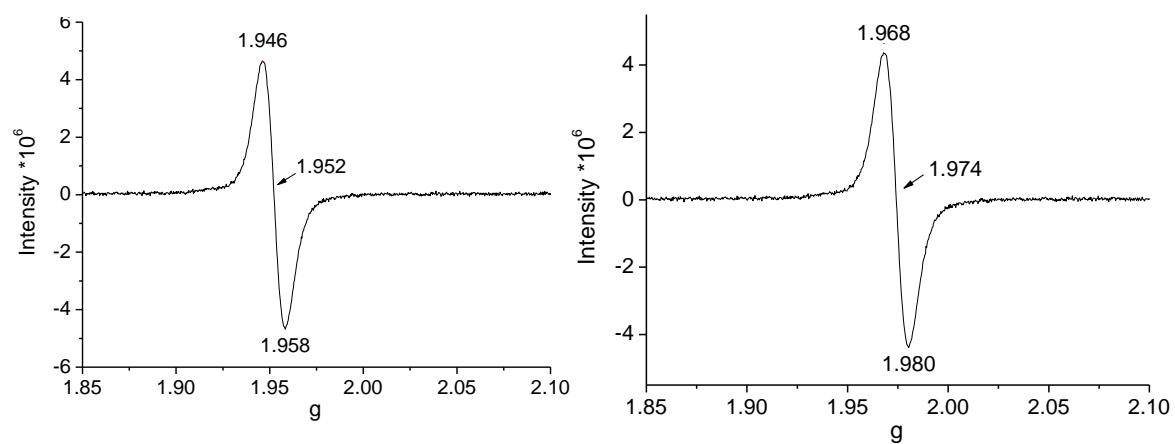

**Figure S27:** EPR spectra (THF) of  $t\text{BuIr}_2\text{N}^{+\text{BPh}_4-}$  (2 K left) and  $t\text{BuIr}_2\text{N}$  (100 K right).

## XPS-Spectra

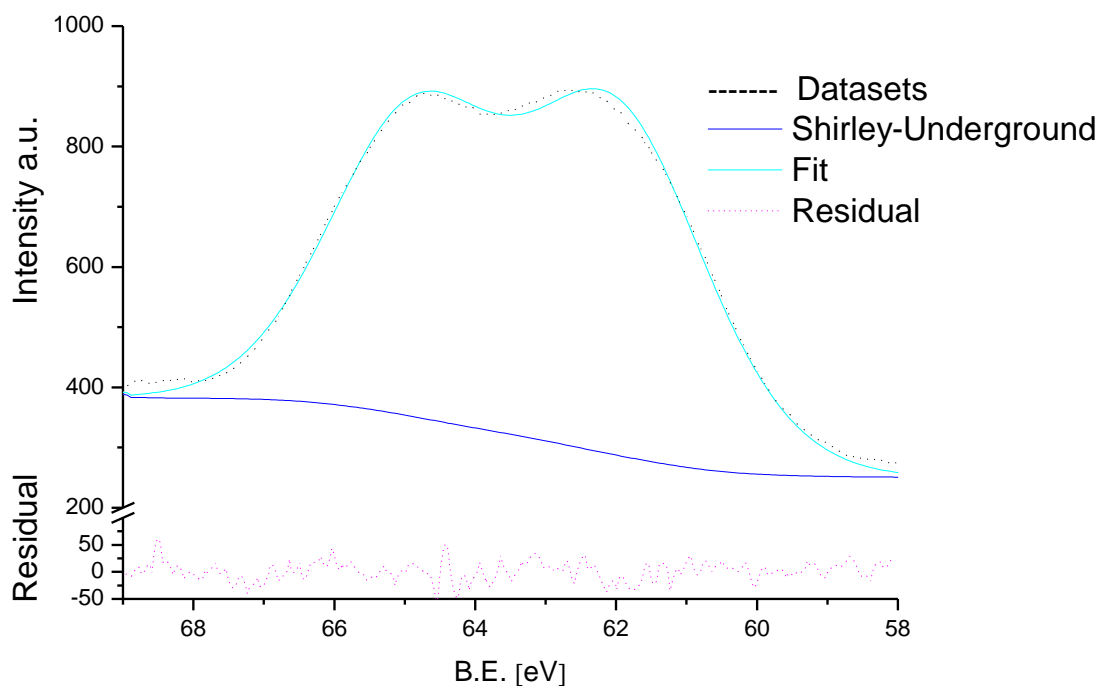

**Figure S28:** Ir(4f) XPS spectrum of  $\text{Ir}_2\text{N}_3^{+\text{Al}-}$ , peak position 64.4 eV; Gaussian Lorentzian 45%; maxima  $4f_{7/2}$ : 62.2 eV  $4f_{5/2}$ : 65.0 eV. Problems with reference caused by fluorine.

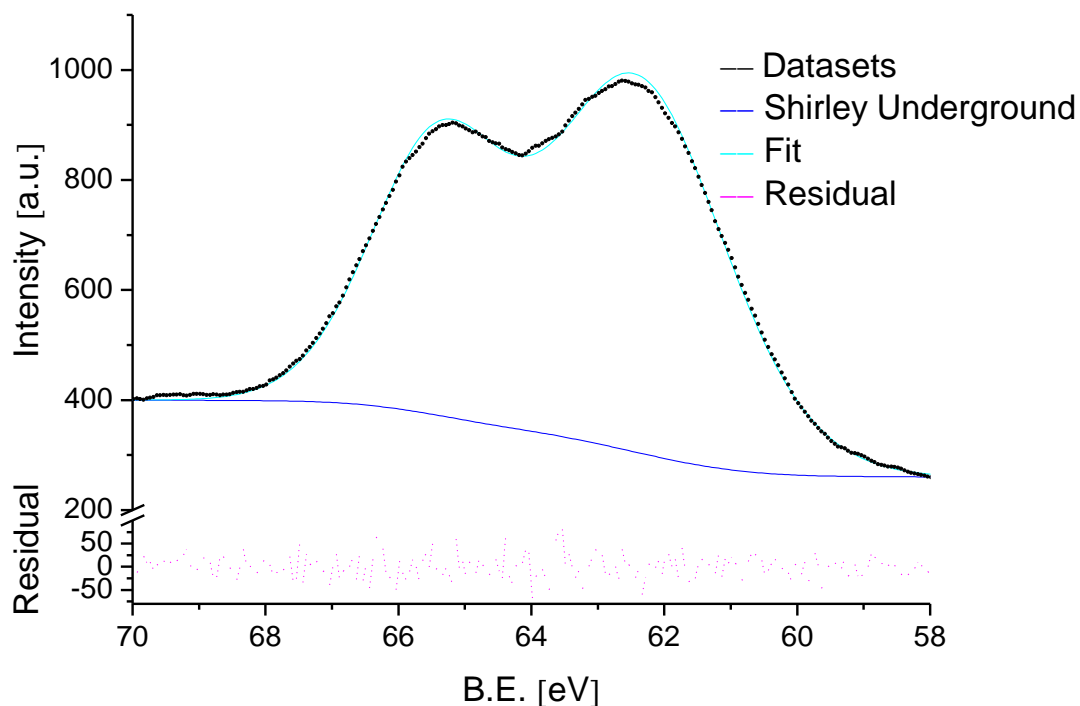

**Figure S29:** Ir(4f) XPS spectrum of  $^{\text{tBu}}\text{Ir}_2\text{N}^{+\text{BPh}_4-}$ , peak position 64.8 eV; FWHM 2.377 eV; Gaussian Lorentzian 45%; maxima  $4f_{7/2}$ : 62.5 eV  $4f_{5/2}$ : 65.3 eV.

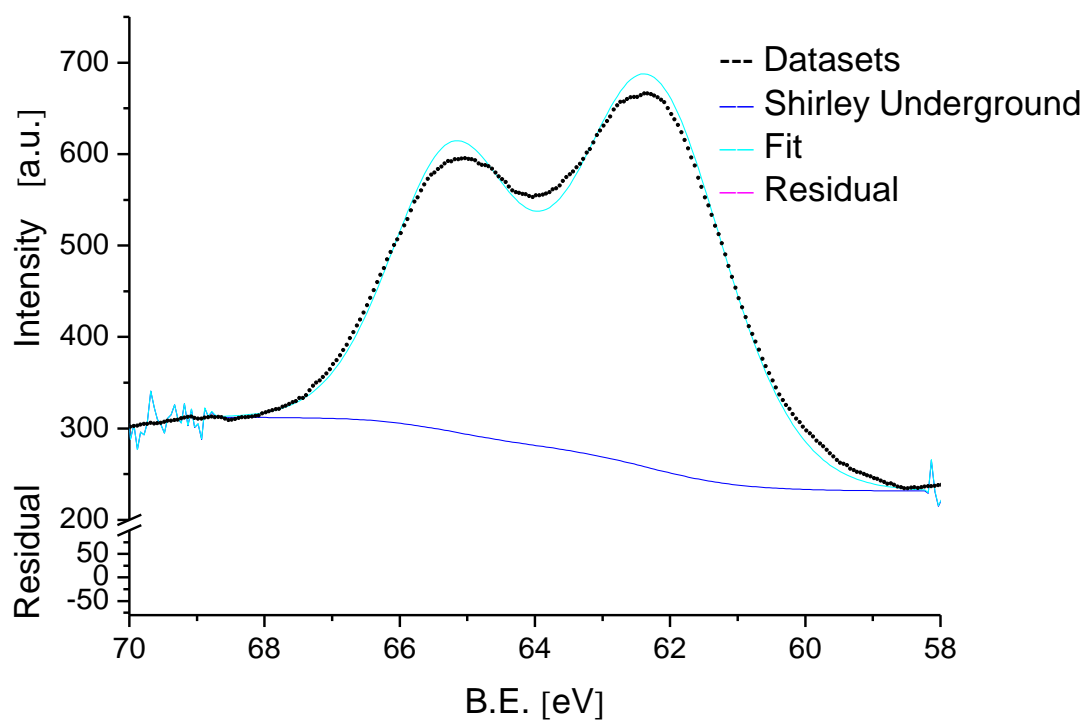

**Figure S30:** Ir(4f) XPS-spectrum of  $\text{Ir}_2\text{N}^{7-\text{Na}+}$ , peak position 64.5 eV; FWHM 2.256 eV; Gaussian Lorentzian 45%; maxima  $4f_{7/2}$ : 61.9 eV  $4f_{5/2}$ : 64.8 eV.

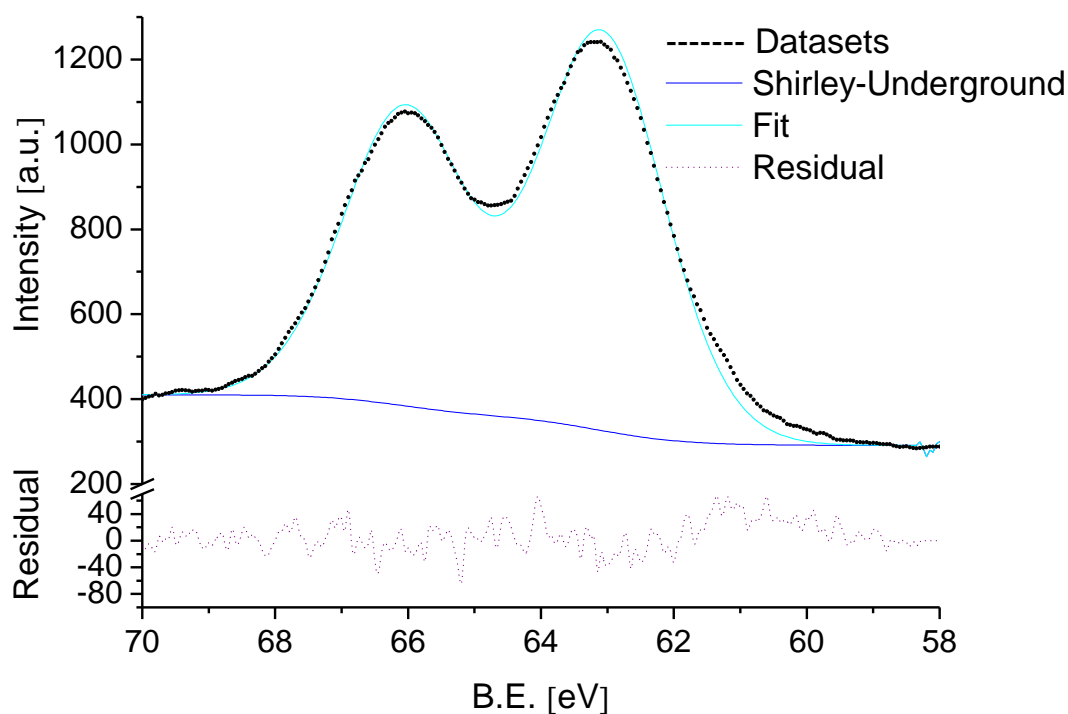

**Figure S31:** Ir(4f) XPS-spectrum of  $[\text{Ir}(\text{tBuN}_3\text{Me}_4)(\text{Me})(\text{OTf})_2]$ , peak position 64.2 eV; FWHM 2.087 eV; Gaussian Lorentzian 45%; maxima  $4f_{7/2}$ : 63.0 eV  $4f_{5/2}$ : 66.0 eV.

## ESI-MS

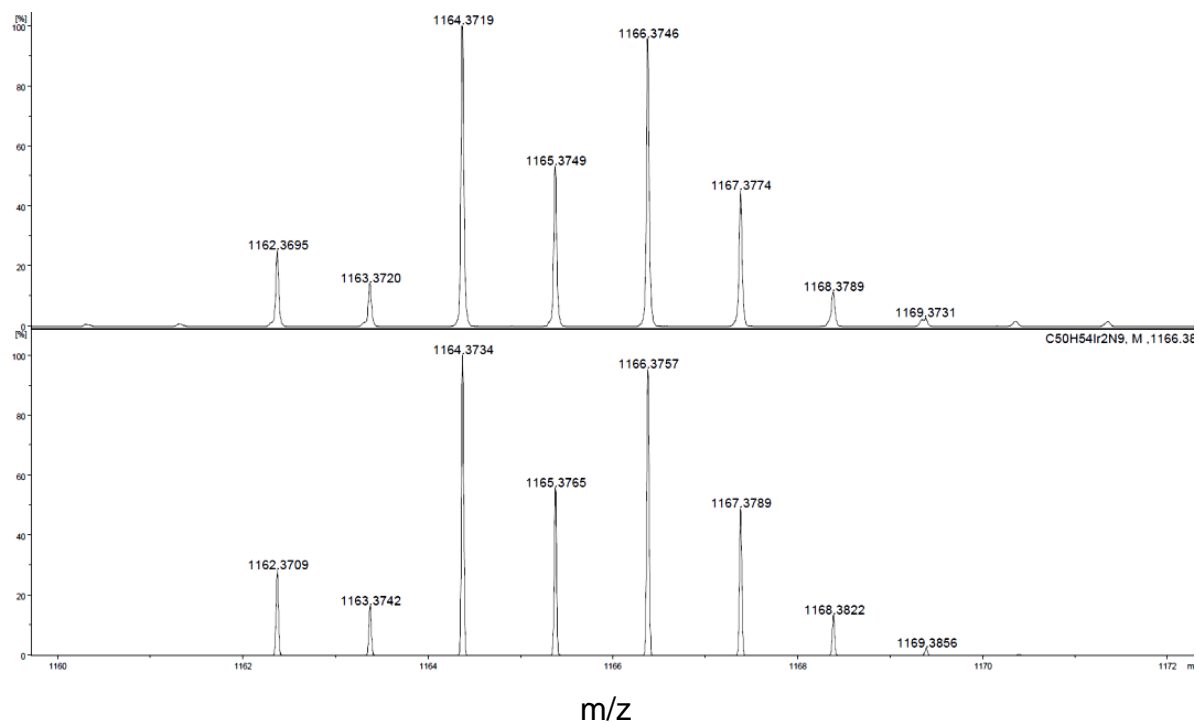

**Figure S32:** ESI-MS (THF, 80°C, positive mode) of  $\text{Ir}_2\text{N}_3^{+\text{Al}^-}$ .

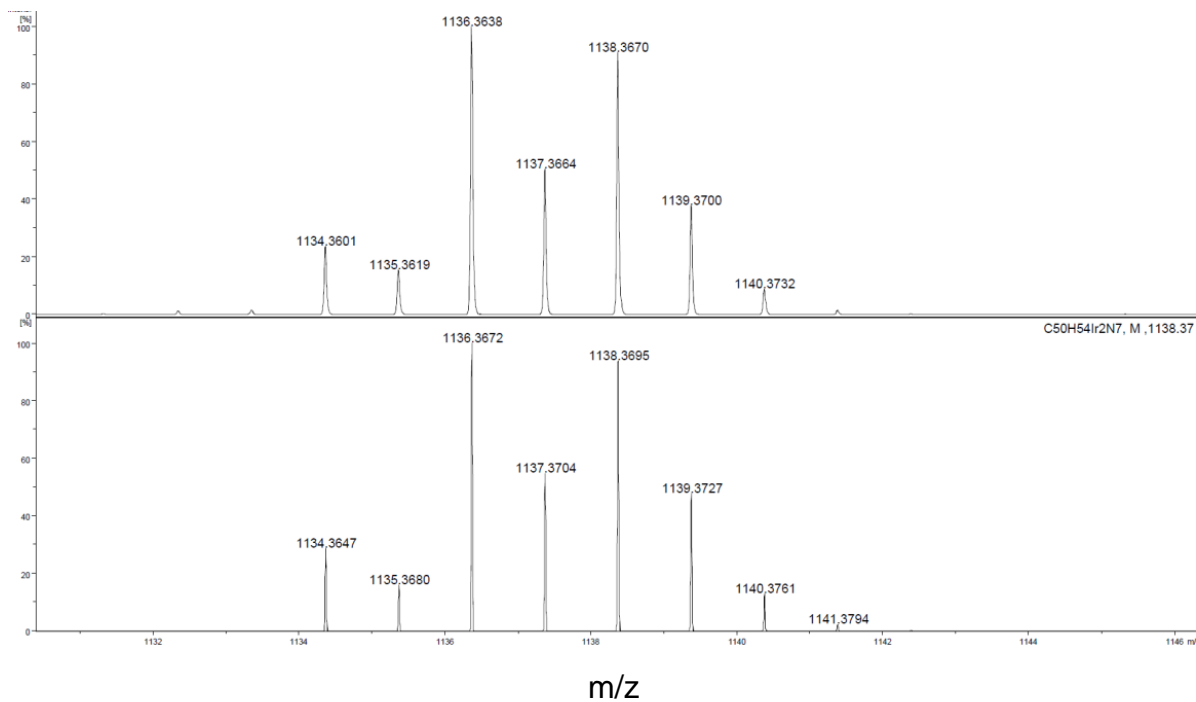

**Figure 33:** ESI-MS (THF, 80°C, positive mode) of  $\text{Ir}_2\text{N}^{+\text{Al}^-}$ .

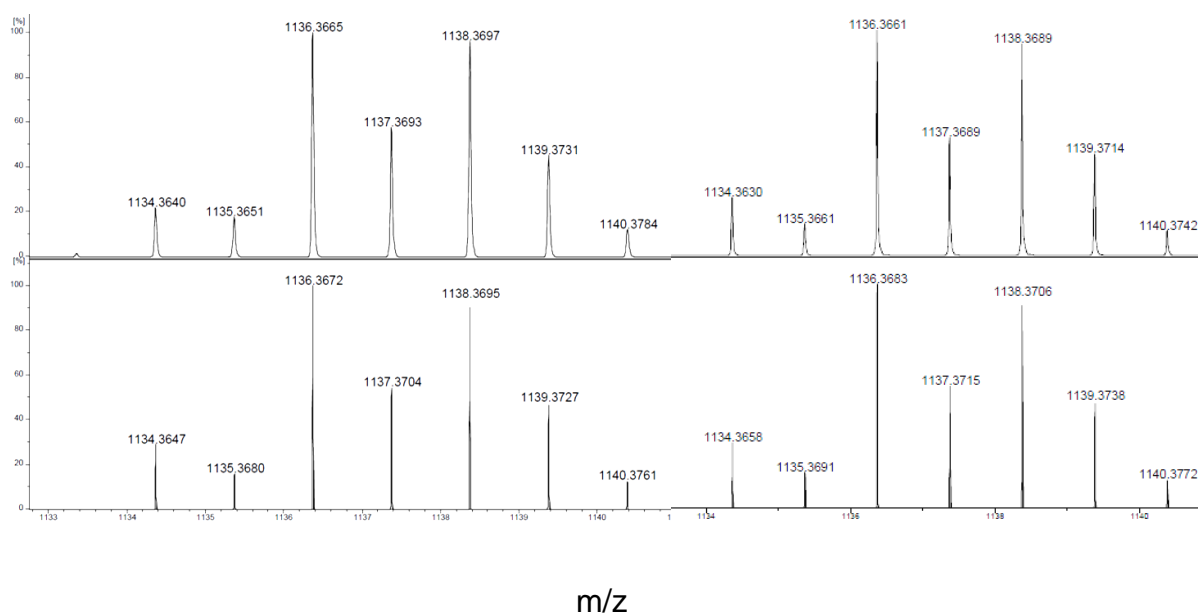

**Figure S34:** ESI-MS (THF, 80°C, left positive and right negative mode) of  $\text{Ir}_2\text{N}$ .

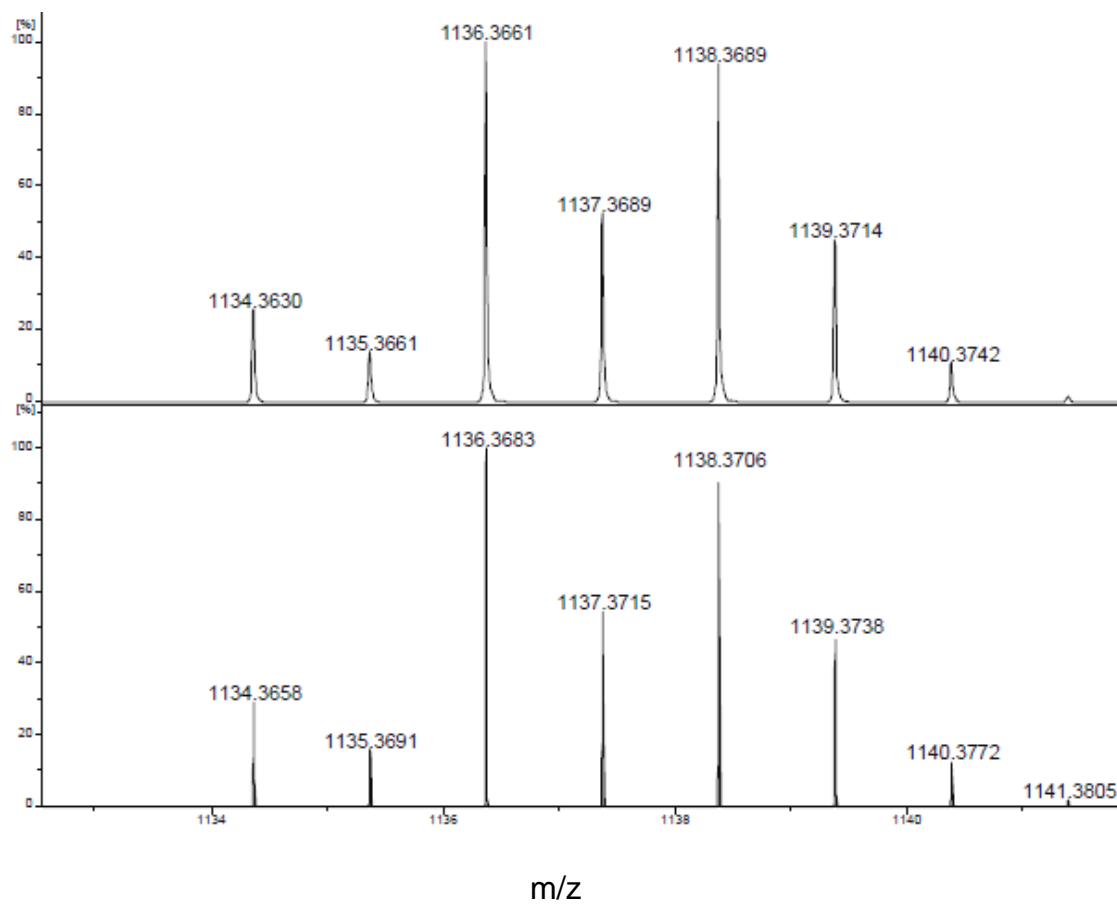

**Figure S35:** ESI-MS (THF, 80°C, negative mode) of  $\text{Ir}_2\text{N}^{-\text{Na}+}$ .

## 2) Computational Studies

The DFT calculations were carried out with the parallelized version 6.5 of Turbomole.<sup>S12</sup> The Becke-Perdew (BP-86) functional<sup>S13,S14</sup> was used for the geometry optimizations employing the resolution of identity (RI) methodology<sup>S12</sup> available in Turbomole (ridft, rdgrad). For calculations of open-shell systems the unrestricted formalism was employed. For the C, Cl, H and N atoms Ahlrichs def-SV(P) basis sets (double zeta with polarization functions for C, Cl and N) were employed. For iridium a larger Ahlrichs def2-TZVP triple- $\zeta$  basis set with polarization together with a Stuttgart-Dresden (ECP-60-MWB) pseudopotential<sup>S15</sup> was used throughout in the calculations. Natural population analysis charges (NPA)<sup>S16</sup> charges were calculated with the Turbomole program package.

The geometries were optimized with either  $C_{2v}$ - or  $D_{2d}$ -symmetry constraints. They were verified as ground states by probing for different spin states and characterized as stationary points by the calculation of analytical second derivatives through the absence of imaginary frequencies. This is also valid for the neutral  $\text{Ir}_2\text{N}$  model system, which is deemed to undergo a Jahn-Teller distortion due to its electron configuration (Fig. 3,  $2 e^3$ ). The X-ray crystal structure of the azido-bridged complex  $\text{Ir}_2\text{N}_3^+$  displays a bent Ir-N<sub>3</sub>-Ir unit, while the linear orientation of this entity is clearly the (DFT) energy minimum of the model complex. DFT geometry optimizations of the full complex also converge at the linear structure and, only after Grimme's (D3) dispersion corrections are applied, the bent structure is correctly reproduced. The total energies and the final optimized geometries are tabulated in Tables S7-S13, respectively.

For the localized orbital bond analysis (LOBA)<sup>S17</sup> Pipek-Mezey localized bond orbitals (LMOs) were generated and subjected to a subsequent Mulliken population analyses for the metal based orbitals with  $> 10\%$  contribution. This procedure was performed with the Turbomole program. Natural orbitals for the open shell systems were also created with the Turbomole program.

The starting orbitals for the broken symmetry wavefunction ( $S=0$ ) of the cationic model complex for  $\text{Ir}_2\text{N}^+$  were obtained from the wavefunction of the  $S=1$  system using the "Canossa" program, which was generously provided to the authors by Christoph van Wüllen (TU Kaiserslautern). For the cationic model system  $\text{Ir}_2\text{N}^+$  we have performed calculations for the  $S=1$  state and the  $S=0$  broken symmetry solution of the open shell singlet for different DFT functionals in the gas phase as well as in the liquid phase (THF  $\epsilon = 7.4$ ) using the COSMO dielectric continuum model (Table S5).

Mayer bond orders were calculated with the Multiwfn ver. 3.3 program package<sup>S18</sup> using Molden input files generated by Turbomole in combination with the Molden2AIM ver. 2.2.3<sup>S19</sup> program (Table S6).

The orbital plots were obtained from Turbomole generated cube files with the Chemcraft program package.<sup>S20</sup>

**Table S5. Singlet Triplet Energy Gap for different functionals of IrN<sub>2</sub><sup>+</sup> model system.**

| DFT Functional                           | Triplet, S =1      |                   | Broken Symmetry (BS)<br>Open Shell Singlet<br>(@triplet geometry) |                   | E(S=1)-<br>E(BS) | J <sub>S=1/BS</sub> <sup>a</sup> |
|------------------------------------------|--------------------|-------------------|-------------------------------------------------------------------|-------------------|------------------|----------------------------------|
|                                          | Total<br>Energy[H] | <S <sup>2</sup> > | Total Energy [H]                                                  | <S <sup>2</sup> > | [kJ/mol]         | [cm <sup>-1</sup> ]              |
| <b>BP86</b>                              | -1133.56315        | 2.01              | -1133.56306                                                       | 1.01              | -0.2             | -17                              |
| <b>PBE</b>                               | -1132.19665        | 2.01              | -1132.19655                                                       | 1.01              | -0.3             | -25                              |
| <b>TPSS</b>                              | -1133.36281        | 2.01              | -1133.36273                                                       | 1.02              | -0.2             | -19                              |
| <b>PBE0</b>                              | -1132.05196        | 2.06              | -1132.05256                                                       | 1.10              | +1.6             | +142                             |
| <b>TPSSH</b>                             | -1133.18711        | 2.03              | -1133.18724                                                       | 1.04              | +0.3             | +25                              |
| <b>B3LYP</b>                             | -1132.52718        | 2.04              | -1132.52752                                                       | 1.06              | +0.9             | +77                              |
| <b>BP86<br/>COSMO, ε=7.4<sup>b</sup></b> | -1133.62254        | 2.01              | -1133.62243                                                       | 1.01              | -0.3             | -25                              |

<sup>a)</sup>  $J = E(\text{BS}(S=1)) - E(\text{BS open shell singlet}) / (<S^2(\text{triplet})> - <S^2(\text{BS open shell singlet})>)$ .<sup>S21</sup>

<sup>b)</sup> COSMO dielectric continuum model



**Table S6.** Electronic and structural properties of the chlorido, azido and nitrido complexes IrCl, IrN, Ir<sub>2</sub>N<sub>3</sub><sup>+</sup>, Ir<sub>2</sub>N<sup>+</sup>, Ir<sub>2</sub>N, Ir<sub>2</sub>N<sup>-</sup> with selected calculated values for the corresponding model compounds.

| Parameter                                                                                                                     | IrCl                    | IrN                       | Ir <sub>2</sub> N <sub>3</sub> <sup>+</sup> | Ir <sub>2</sub> N <sup>+</sup> | Ir <sub>2</sub> N       | Ir <sub>2</sub> N <sup>-</sup> |
|-------------------------------------------------------------------------------------------------------------------------------|-------------------------|---------------------------|---------------------------------------------|--------------------------------|-------------------------|--------------------------------|
| ground state                                                                                                                  | S=0                     | S=0                       | S=0                                         | S=0 <sup>a</sup>               | S=1/2                   | S=0                            |
| EPR<br>g-value                                                                                                                | -                       | -                         | -                                           | 1.95                           | 1.92                    | -                              |
| XPS [eV] <sup>b</sup>                                                                                                         |                         |                           |                                             |                                |                         |                                |
| Ir(4f <sub>7/2</sub> )                                                                                                        | 62.0                    | 63.1                      | 62.2                                        | 62.5                           | 61.9                    | 61.9                           |
| Ir(4f <sub>5/2</sub> )                                                                                                        | 65.0                    | 66.0                      | 65.0                                        | 65.3                           | 64.8                    | 64.8                           |
| LOBA<br>ox. state<br>el. config.                                                                                              | Ir(I)<br>d <sup>8</sup> | Ir(III)<br>d <sup>6</sup> | Ir(I)<br>d <sup>8</sup>                     | Ir(I)<br>d <sup>8</sup>        | Ir(I)<br>d <sup>8</sup> | Ir(I)<br>d <sup>8</sup>        |
| MPAs (%)                                                                                                                      |                         |                           |                                             |                                |                         |                                |
| d <sub>z<sup>2</sup></sub>                                                                                                    | 99                      | 99                        | 99                                          | 99/99                          | 99/99                   | 99/99                          |
| d <sub>yz</sub> <sup>d</sup>                                                                                                  | 80                      | 90                        | 85                                          | 87/87                          | 84/84                   | 81/81                          |
| d <sub>xy</sub> <sup>d</sup>                                                                                                  | 98                      | 62                        | 90                                          | 78/78                          | 84/84                   | 84/84                          |
| d <sub>xz</sub>                                                                                                               | 67                      | 57                        | 72                                          | 64/64                          | 62/62                   | 63/63                          |
| ligand                                                                                                                        | -                       | 70                        | -                                           | 38/38                          | 74/74                   | 73/73                          |
| PDI ligand charge                                                                                                             | 0                       | -2                        | 0                                           | -1                             | -1.5                    | -2                             |
| Ir-N <sub>azido, nitrido</sub><br>exp. distance [Å], <sup>c</sup><br>calc. distance [Å], <sup>c</sup><br>Mayer bond order     | n/a                     | 1.646<br>1.692<br>2.54    | 1.965<br>1.933<br>0.90                      | 1.807<br>1.791<br>1.52         | n/a<br>1.80<br>1.49     | 1.845<br>1.813<br>1.47         |
| NPA charges<br>spin. dens.                                                                                                    |                         |                           |                                             |                                |                         |                                |
| Ir                                                                                                                            | 0.55                    | 0.77                      | 0.62                                        | 0.69<br>0.16                   | 0.67<br>0.08            | 0.64                           |
| N <sub>nitrido, azido</sub>                                                                                                   | -                       | -0.32                     | -0.32                                       | -0.39<br>0.17                  | -0.46<br>0.08           | -0.52                          |
| N <sub>pyridine</sub>                                                                                                         | -0.44                   | -0.64                     | -0.44                                       | -0.54<br>0.14                  | -0.58<br>0.08           | -0.63                          |
| N <sub>imine</sub>                                                                                                            | -0.63                   | -0.69                     | -0.63                                       | -0.65<br>0.08                  | -0.67<br>0.05           | -0.69                          |
| C <sub>py</sub> -C <sub>imi</sub><br>exp. distance [Å], <sup>c</sup><br>calc. distance [Å], <sup>c</sup><br>Mayer bond order  | 1.451<br>1.441<br>1.18  | 1.424<br>1.422<br>1.24    | 1.460<br>1.441<br>1.17                      | 1.440<br>1.444<br>1.16         | n/a<br>1.432<br>1.22    | 1.410<br>1.421<br>1.28         |
| C <sub>imi</sub> -N <sub>imi</sub><br>exp. distance [Å], <sup>c</sup><br>calc. distance [Å], <sup>c</sup><br>Mayer bond order | 1.331<br>1.335<br>1.56  | 1.329<br>1.344<br>1.44    | 1.314<br>1.330<br>1.58                      | 1.33<br>1.334<br>1.54          | n/a<br>1.348<br>1.45    | 1.35<br>1.363<br>1.37          |

<sup>a</sup>open shell singlet with S=0 ⇌ S=1 spin state crossover; <sup>b</sup>values for Ir(III) reference compound [Ir<sup>III</sup>(tBuN<sub>3</sub>Me<sub>4</sub>)(Me)(OTf)<sub>2</sub>] 4f<sub>7/2</sub>: 63.0, 4f<sub>5/2</sub>: 66.0 [eV]. <sup>c</sup>averaged values for symmetry related bonds; <sup>d</sup>averaged values for α and β orbitals.

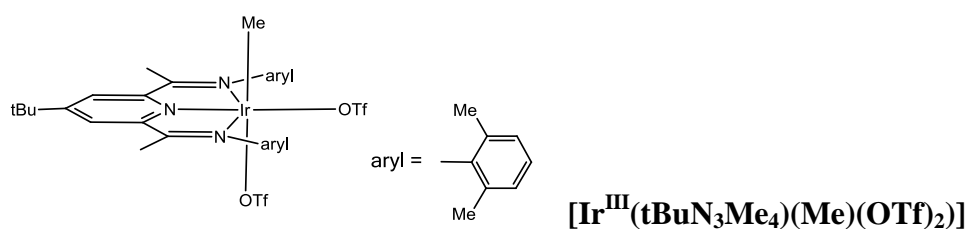

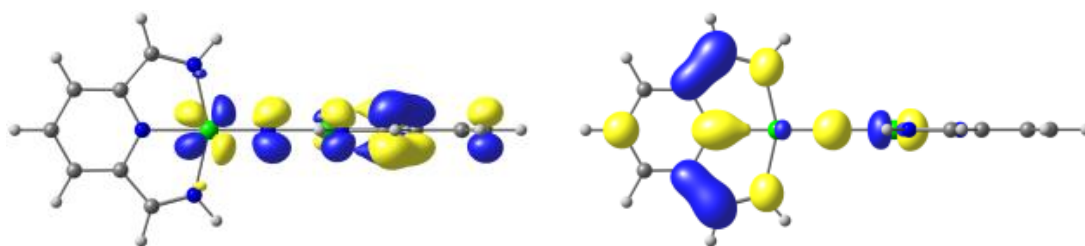

**Fig. S36.** Natural orbitals (SNMOs) of the model complex for  $\text{Ir}_2\text{N}^+$ .

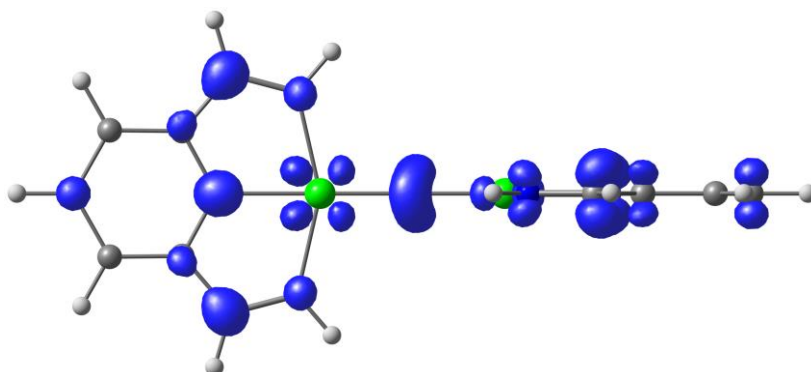

**Fig. S37.** Spin density of the cationic model complex  $\text{Ir}_2\text{N}^+$  ( $S=1$ ); isosurface value 0.007.

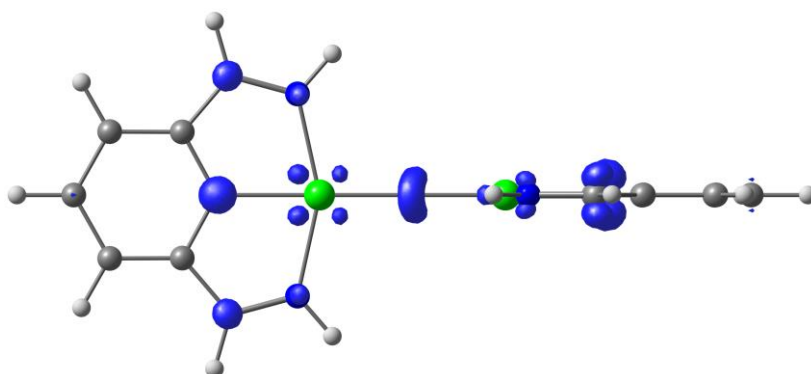

**Fig. S38.** Spin density of the neutral model complex  $\text{Ir}_2\text{N}$  ( $S=1/2$ ); isosurface value 0.007.

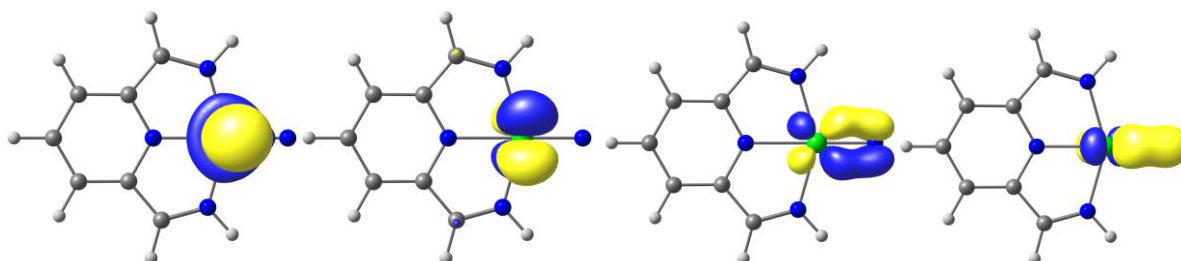

**Fig. S39.** Metal centered Pipek-Mezey localized molecular orbitals used in the LOBA of the  $\text{IrN}$  model complex, (Mulliken pop.  $d_{z^2}$ (99%),  $d_{yz}$ (90%),  $d_{xy}$ (62%),  $d_{xz}$ (57%) left to right).

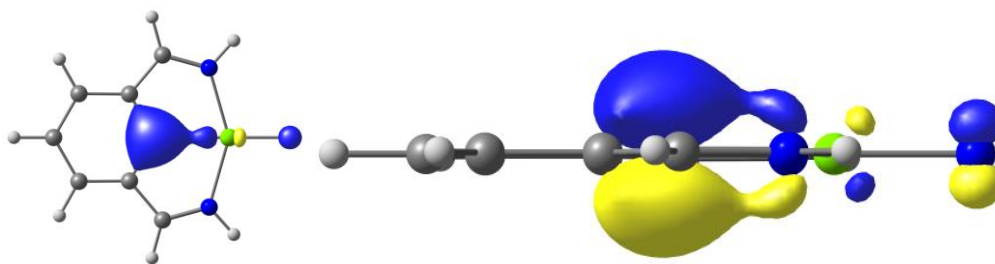

**Fig. S40.** Pipek-Mezey localized orbital (LMO) related to the non-innocent PDI ligand in the nitrido complex **IrN** (top and side view).

The extra electrons in the neutral and anionic complexes **Ir<sub>2</sub>N** and **Ir<sub>2</sub>N<sup>-</sup>** are essentially located on the PDI ligands. This is partially supported by the LOBA for the  $\mu$ -bridged nitrido model systems. The LOBA for the  $\alpha$ -electrons of **Ir<sub>2</sub>N<sup>+</sup>** ( $S=1$ ) model revealed one ligand based LMO for each PDI ligand. For the  $\beta$ -electrons the corresponding LMOs were missing, suggesting singly reduced **PDI<sup>-1</sup>** ligands. In the LOBA for the anionic model system of **Ir<sub>2</sub>N<sup>-</sup>**, which carries two further electrons, both, the  $\alpha$ - and  $\beta$ -based LMOs of this type were observed, consistent with a doubly reduced **PDI<sup>-2</sup>** ligand. This analysis is stretched to its limits, since 4 ( $2\alpha$  and  $2\beta$ ) of these unique LMOs were derived for the neutral model system of **Ir<sub>2</sub>N** although only 3 were expected.

## Mulliken Population Analysis &/ LMOs (Pipek-Mezey) for the neutral model system of IrCl

restricted Kohn-Sham DFT, BP86 functional; MPA values with contributions of > 10% are given.

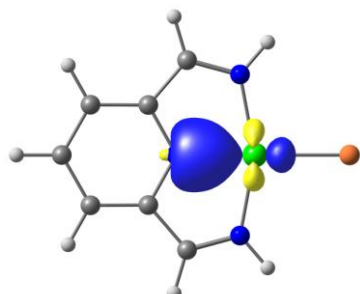

**LMO 25: 0.44 e<sup>-</sup> Ir / 1.58 e<sup>-</sup> N<sub>pyridine</sub>**

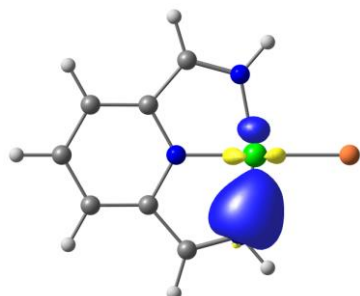

**LMO 26: 0.36 e<sup>-</sup> Ir / 1.70 e<sup>-</sup> N<sub>imine</sub>**

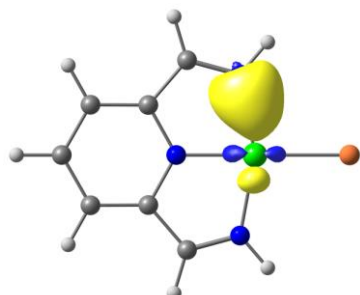

**LMO 27: 0.36 e<sup>-</sup> Ir / 1.70 e<sup>-</sup> N<sub>imine</sub>**

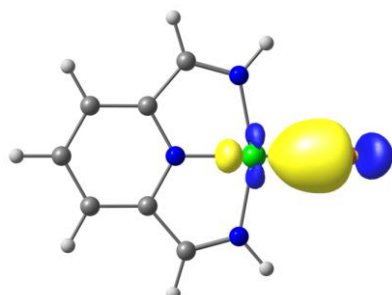

**LMO 41: 0.38 e<sup>-</sup> Ir / 1.62 e<sup>-</sup> Cl**

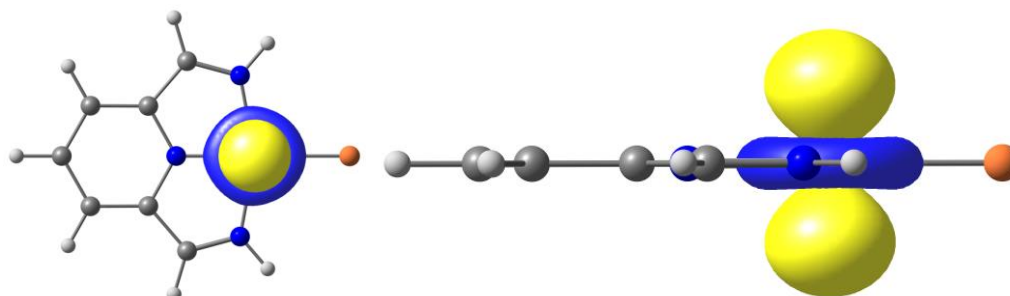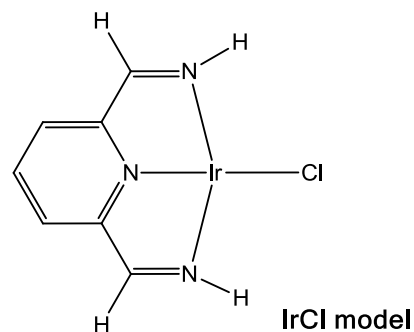

**IrCl model**

**LMO 47: 2 e<sup>-</sup> Ir(d<sub>z<sup>2</sup></sub>)**

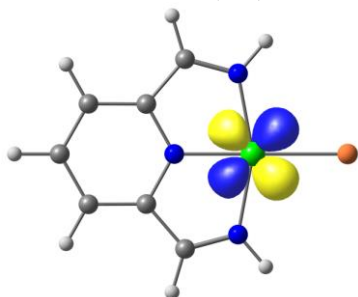

**LMO 48: 1.96 e<sup>-</sup> Ir(d<sub>xy</sub>)**

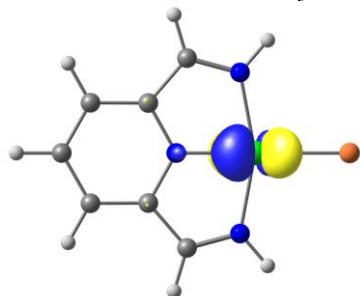

**LMO 51: 1.34 e<sup>-</sup> Ir(d<sub>xz</sub>) / 0.11 e<sup>-</sup> N<sub>pyridine</sub> / 0.10 e<sup>-</sup> each pyridine carbon atoms in 2,6 positions**

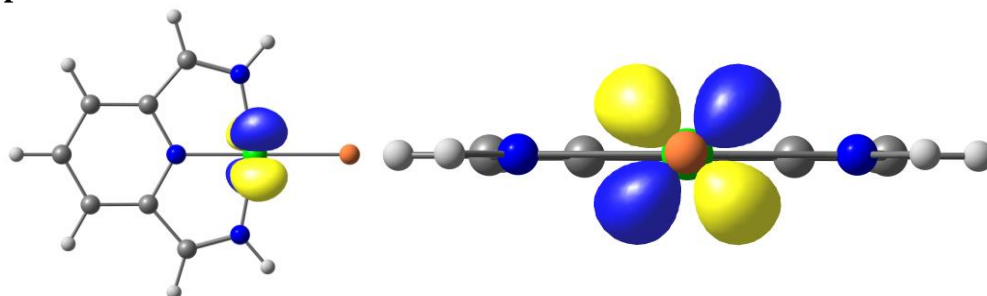

**LMO 52: 1.60 e<sup>-</sup> Ir(d<sub>yz</sub>)**

## Mulliken Population Analysis & LMOs (Pipek-Mezey) for the neutral model system of IrN

restricted Kohn-Sham DFT, BP86 functional; MPA values with contributions of > 10% are given.

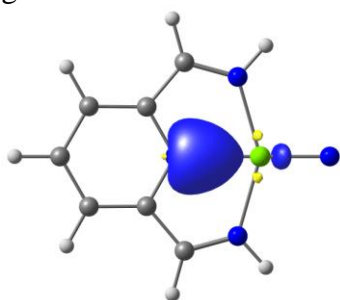

**LMO 21: 0.26 e<sup>-</sup> Ir / 1.72 e<sup>-</sup> N<sub>pyridine</sub>**

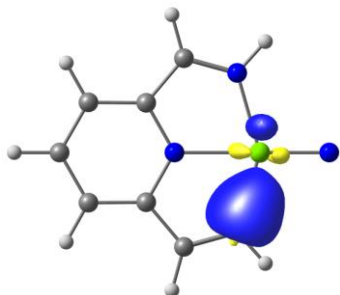

**LMO 25: 0.41 e<sup>-</sup> Ir / 1.62 e<sup>-</sup> N<sub>imine</sub>**

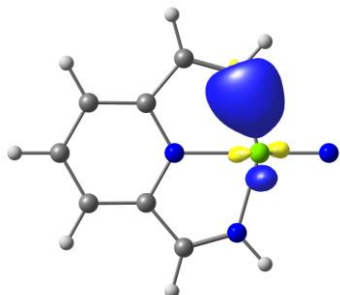

**LMO 26: 0.41 e<sup>-</sup> Ir / 1.62 e<sup>-</sup> N<sub>imine</sub>**

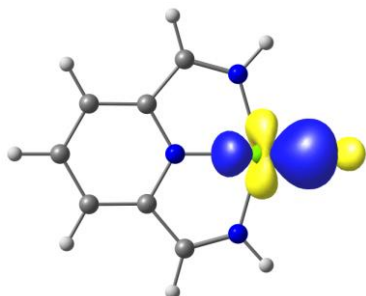

**LMO 33: 0.79 e<sup>-</sup> Ir / 1.21 e<sup>-</sup> N<sub>nitrido</sub>**

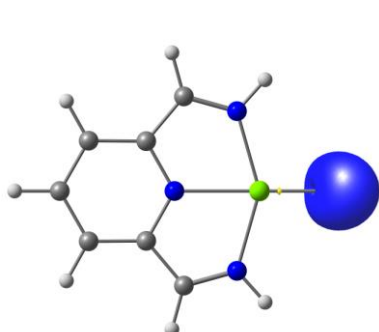

**LMO 16: 0.12 e<sup>-</sup> Ir / 1.88 e<sup>-</sup> N<sub>nitrido</sub> (lone pair)**

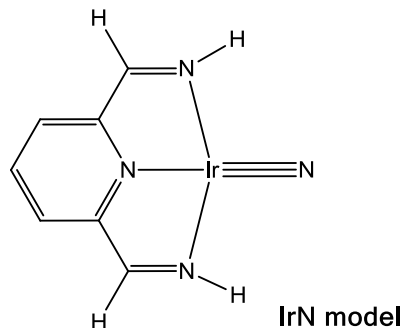

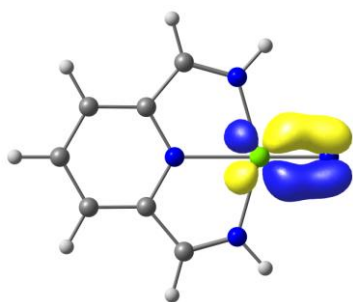

**LMO 39:** 1.23 e<sup>-</sup> Ir (d<sub>xy</sub>) / 0.77 e<sup>-</sup> N<sub>nitrido</sub>

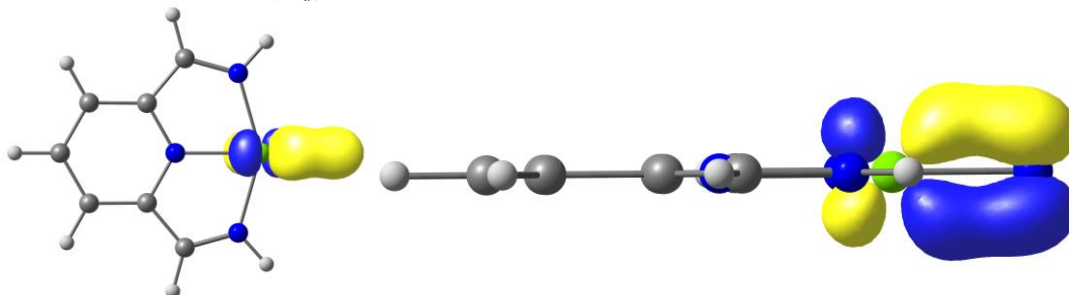

**LMO 40:** 1.14 e<sup>-</sup> Ir (d<sub>xz</sub>) / 0.86 e<sup>-</sup> N<sub>nitrido</sub>

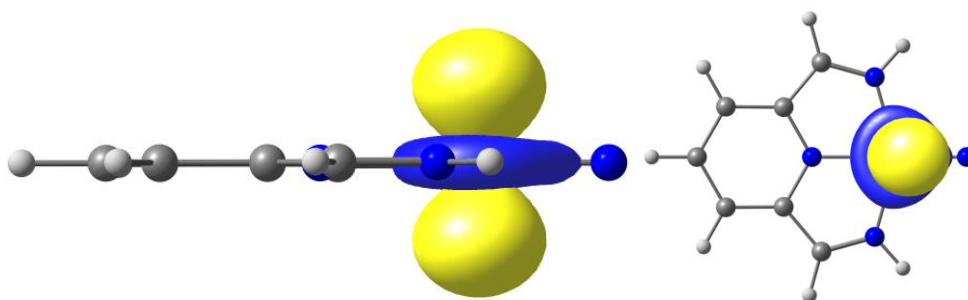

**LMO 22:** 1.98 e<sup>-</sup> Ir (d<sub>2</sub>)

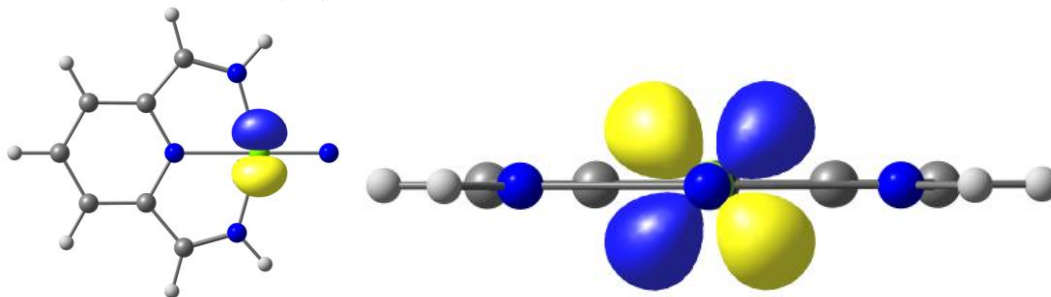

**LMO 47:** 1.79 e<sup>-</sup> Ir(d<sub>yz</sub>)

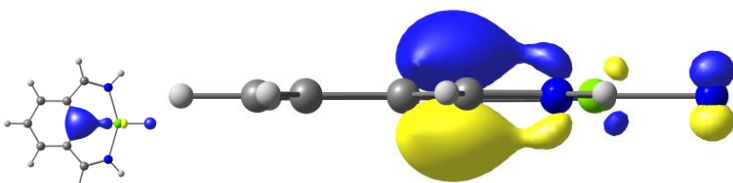

**LMO 45:** PDI ligand (non-innocent) 0.24 e<sup>-</sup> Ir / 1.39 e<sup>-</sup> N<sub>pyridine</sub> / 0.14 e<sup>-</sup> / N<sub>nitrido</sub>

## Mulliken Population Analysis & LMOs (Pipek-Mezey) for the cationic model system of $\text{Ir}_2\text{N}_3^+$

restricted Kohn-Sham DFT, BP86 functional; MPA values with contributions of  $> 10\%$  are given. The LMOs and MPA values for the symmetry related parts are identical.

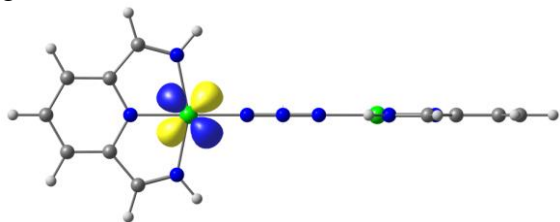

**LMO 90: 1.79 e<sup>-</sup> Ir**

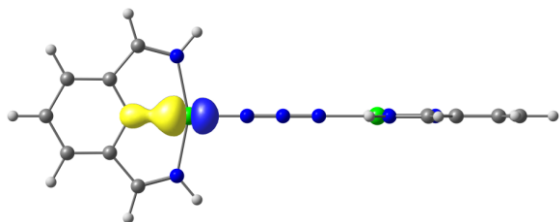

**LMO 92: 1.43 e<sup>-</sup> Ir / 0.36 e<sup>-</sup> N<sub>pyridine</sub>**

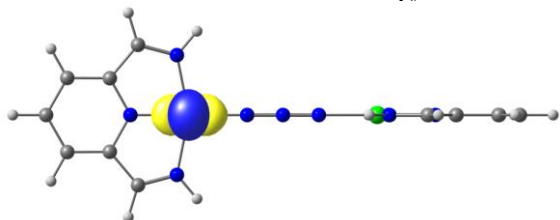

**LMO 94: 1.99 e<sup>-</sup> Ir**

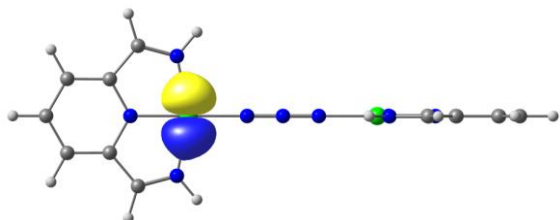

**LMO 96: 1.69 e<sup>-</sup> Ir**

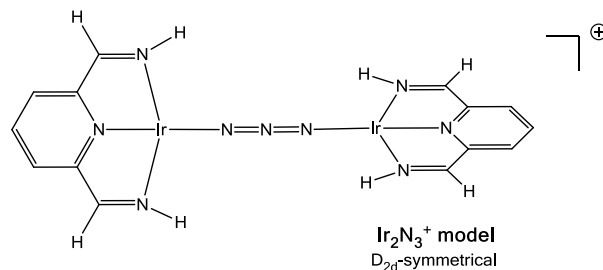



**Mulliken Population Analysis &/ LMOs (Pipek-Mezey) for the cationic model system of  $\text{Ir}_2\text{N}^+$**   
 unrestricted Kohn-Sham DFT (S=1), BP86 functional; MPA values with contributions of > 10% are given.

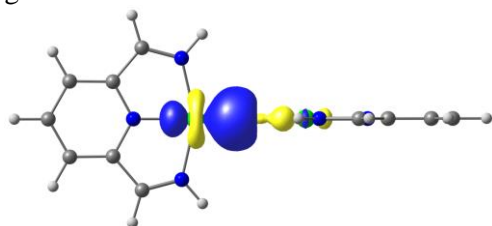

**LMO 38: 0.32 e<sup>-</sup> Ir1 / 0.70 e<sup>-</sup> N<sub>nitrido</sub> (α-spin)**

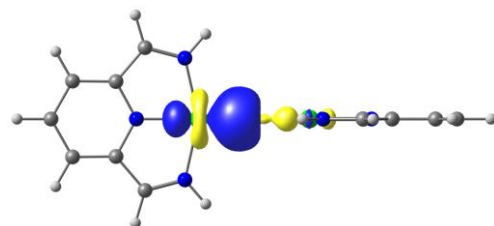

**LMO 129: 0.32 e<sup>-</sup> Ir1 / 0.70 e<sup>-</sup> N<sub>nitrido</sub> (β-spin)**

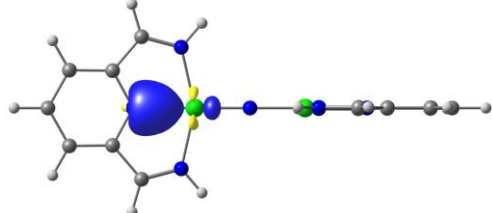

**LMO 41: 0.16 e<sup>-</sup> Ir1 / 0.84 e<sup>-</sup> N<sub>pyridine</sub> (α-spin)**

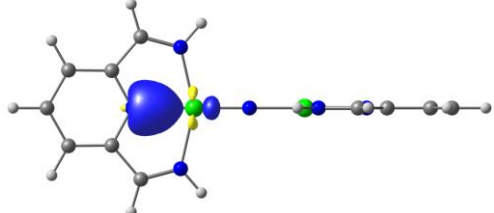

**LMO 132: 0.16 e<sup>-</sup> Ir1 / 0.84 e<sup>-</sup> N<sub>pyridine</sub> (β-spin)**

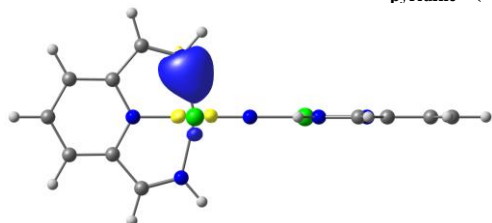

**LMO 42: 0.19 e<sup>-</sup> Ir1 / 0.84 e<sup>-</sup> N<sub>imine</sub> (α-spin)**

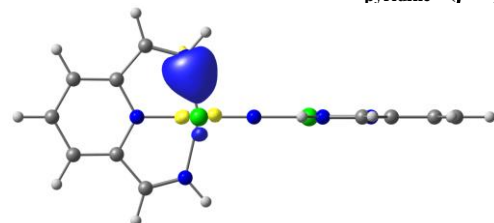

**LMO 136: 0.20 e<sup>-</sup> Ir1 / 0.83 e<sup>-</sup> N<sub>imine</sub> (β-spin)**

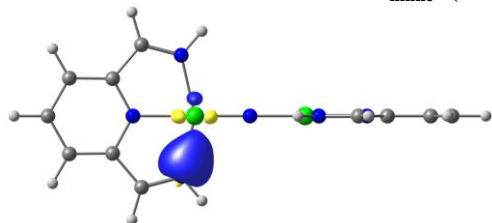

**LMO 44: 0.19 e<sup>-</sup> Ir1 / 0.84 e<sup>-</sup> N<sub>imine</sub> (α-spin)**

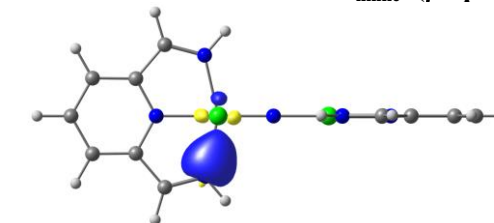

**LMO 133: 0.19 e<sup>-</sup> Ir1 / 0.83 e<sup>-</sup> N<sub>imine</sub> (β-spin)**

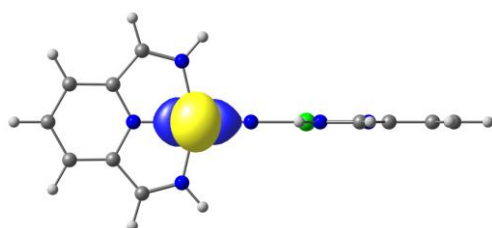

**LMO 73: 1.0 e<sup>-</sup> Ir1(d<sub>z2</sub>) (α-spin)**

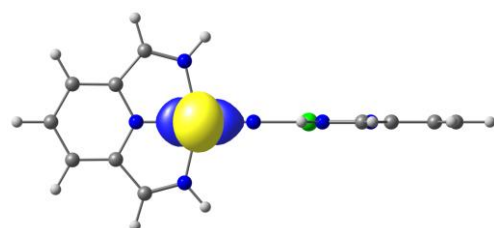

**LMO 164: 1.0 e<sup>-</sup> Ir1(d<sub>z2</sub>) (β-spin)**

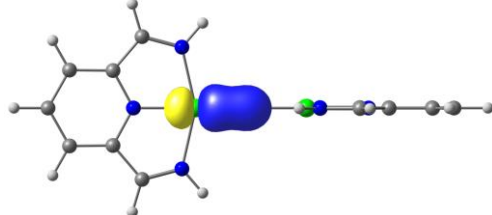

**LMO 78: 0.58 e<sup>-</sup> Ir1(d<sub>xz</sub>)/0.41 e<sup>-</sup> N<sub>nitrido</sub> (α-spin)** **LMO 178: 0.71 e<sup>-</sup> Ir1(d<sub>xz</sub>)/0.25 e<sup>-</sup> N<sub>nitrido</sub> (β-spin)**  
 The values for the α- and β-LMOs were averaged ((0.58+0.71)/2=0.64)

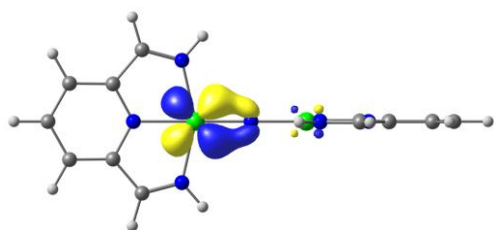

**LMO 82: 0.84 e<sup>-</sup> Ir1(d<sub>xy</sub>) (α-spin)**

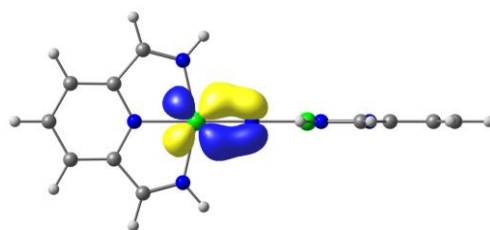

**LMO 171: 0.71 e<sup>-</sup> Ir1(d<sub>xy</sub>) / 0.25 e<sup>-</sup> N<sub>nitrido</sub> (β-spin)**

The values for the α- and β-LMOs were averaged ((0.84+0.71)/2=0.78)

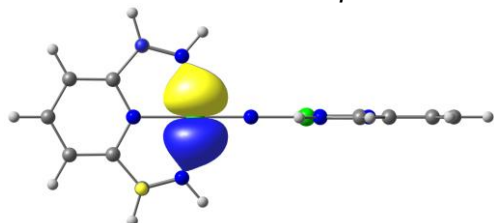

**LMO 91: 0.86 e<sup>-</sup> Ir1(d<sub>yz</sub>) (α-spin)**

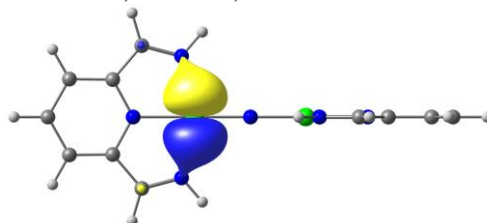

**LMO 179: 0.88 e<sup>-</sup> Ir1(d<sub>yz</sub>) (β-spin)**

The values for the α- and β-LMOs were averaged ((0.86+0.88)/2=0.87)

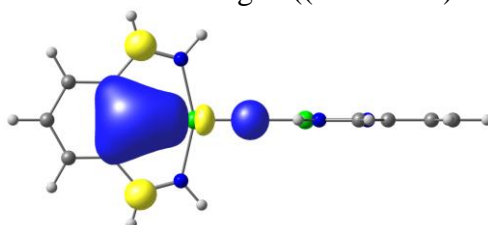

**LMO 81: PDI ligand-1 (non-innocent) 0.75 e<sup>-</sup> N<sub>pyridine</sub> (α-spin) no LMO for β-spin (!)**  
unrestricted Kohn-Sham DFT, BP86 functional; MPA values with contributions of > 10% are given.

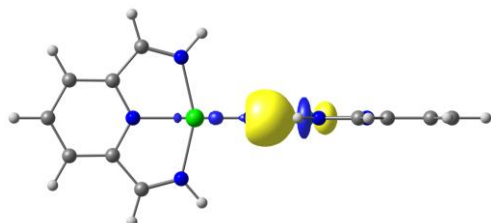

**LMO 39: 0.32 e<sup>-</sup> Ir2 / 0.70 e<sup>-</sup> N<sub>nitrido</sub> (α-spin)**

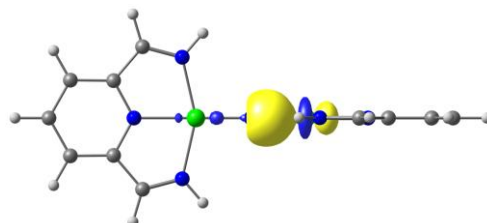

**LMO 130: 0.33 e<sup>-</sup> Ir2/0.69 e<sup>-</sup> N<sub>nitrido</sub> (β-spin)**

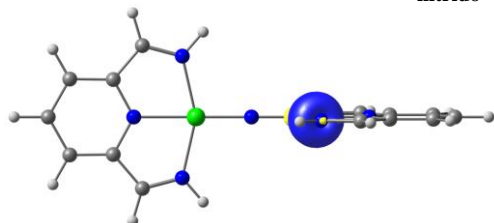

**LMO 43: 0.19 e<sup>-</sup> Ir2 / 0.84 e<sup>-</sup> N<sub>imine</sub> (α-spin)**

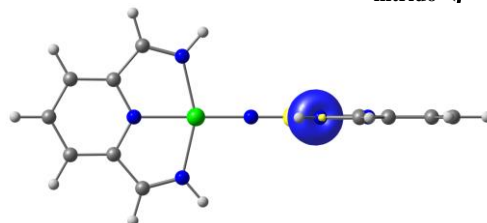

**LMO 134: 0.19 e<sup>-</sup> Ir2 / 0.83 e<sup>-</sup> N<sub>imine</sub> (β-spin)**

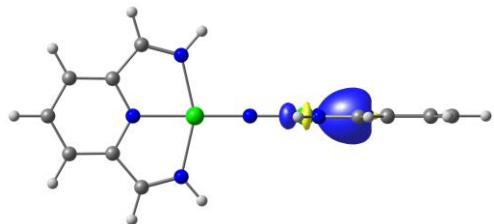

**LMO 40: 0.16 e<sup>-</sup> Ir2/0.84 e<sup>-</sup> N<sub>pyridine</sub> (α-spin)**

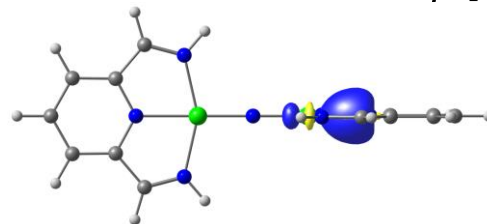

**LMO 131: 0.16 e<sup>-</sup> Ir2/0.84 e<sup>-</sup> N<sub>pyridine</sub> (β-spin)**

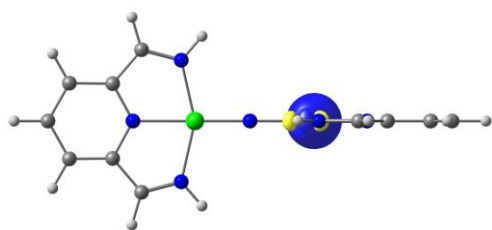

**LMO 45: 0.19 e<sup>-</sup> Ir2/0.84 e<sup>-</sup> N<sub>imine</sub> (α-spin)**

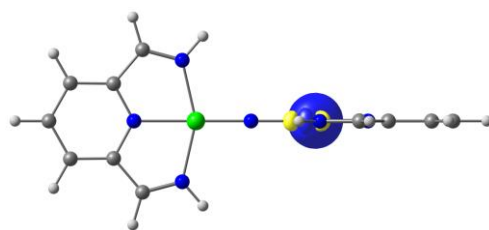

**LMO 135: 0.20 e<sup>-</sup> Ir2/0.83 e<sup>-</sup> N<sub>imine</sub> (β-spin)**

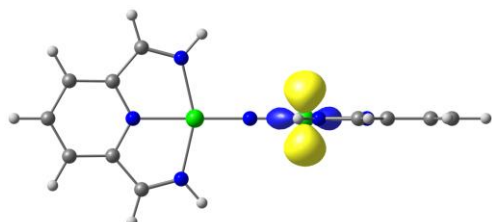

**LMO 72: 1.0 e<sup>-</sup> Ir2(d<sub>z2</sub>) (α-spin)**

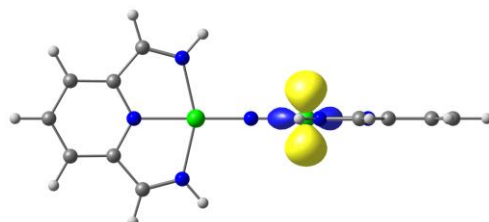

**LMO 163: 1.0 e<sup>-</sup> Ir2(d<sub>z2</sub>) (β-spin)**

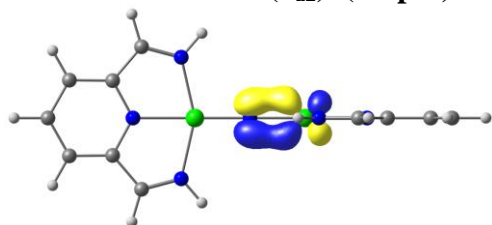

**LMO 79: 0.58 e<sup>-</sup> Ir2(d<sub>xz</sub>)/0.42 e<sup>-</sup> N<sub>nitrido</sub> (α-spin)**

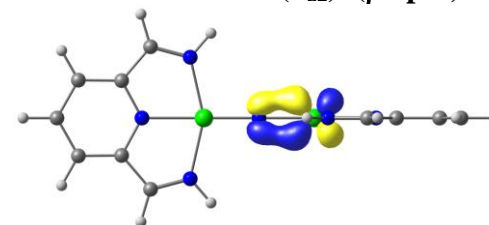

**LMO 177: 0.71 e<sup>-</sup> Ir2(d<sub>xz</sub>)/0.24 e<sup>-</sup> N<sub>nitrido</sub> (β-spin)**

The values for the α- and β-LMOs were averaged ((0.58+0.71)/2=0.64)

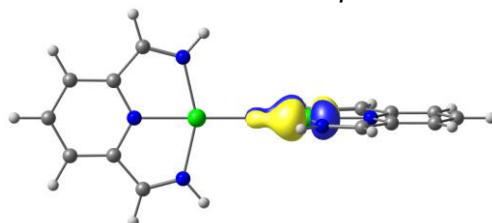

**LMO 83: 0.84 e<sup>-</sup> Ir2(d<sub>xy</sub>) (α-spin)**

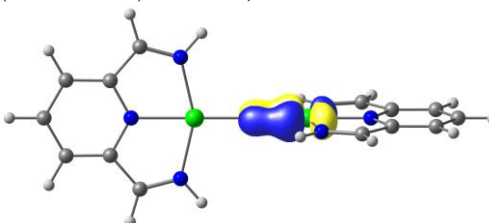

**LMO 172: 0.71 e<sup>-</sup> Ir2(d<sub>xy</sub>) / 0.25 e<sup>-</sup> N<sub>nitrido</sub> (β-spin)**

The values for the α- and β-LMOs were averaged ((0.84+0.71)/2=0.78)

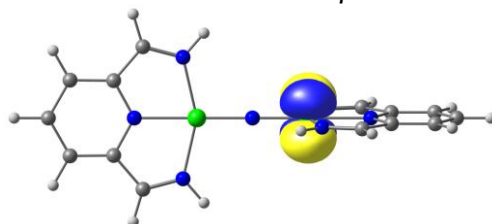

**LMO 90: 0.86 e<sup>-</sup> Ir2(d<sub>yz</sub>) (α-spin)**

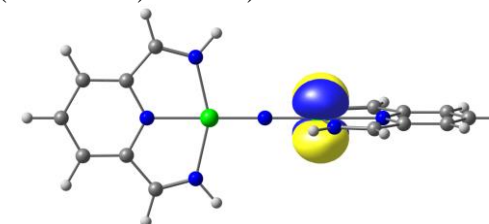

**LMO 180: 0.88 e<sup>-</sup> Ir2(d<sub>yz</sub>) (β-spin)**

The values for the α- and β-LMOs were averaged ((0.86+0.88)/2=0.87)

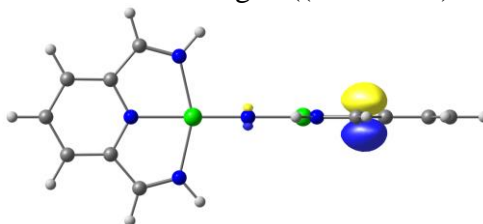

**LMO 80: PDI ligand-2 (non-innocent) 0.75 e<sup>-</sup> N<sub>pyridine</sub> (α-spin)**

**no LMO for β-spin (!)**

## Mulliken Population Analysis &/ LMOs (Pipek-Mezey) for the neutral model system of Ir<sub>2</sub>N

unrestricted Kohn-Sham DFT, BP86 functional; MPA values with contributions of > 10% are given.

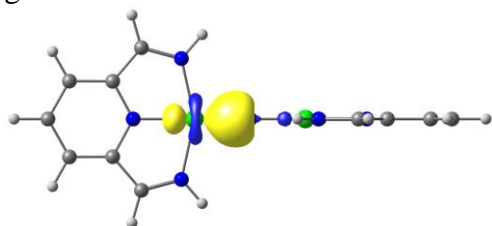

**LMO 39: 0.32 e<sup>-</sup> Ir1/0.70 e<sup>-</sup> N<sub>nitrido</sub> (α-spin)**

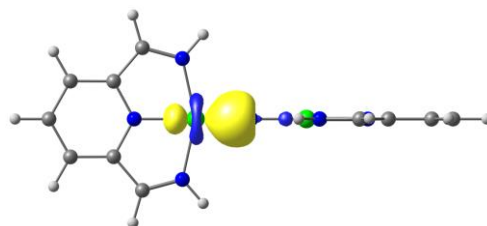

**LMO 129: 0.32 e<sup>-</sup> Ir1/0.70 e<sup>-</sup> N<sub>nitrido</sub> (β-spin)**

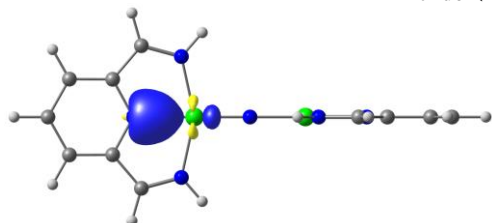

**LMO 40: 0.17 e<sup>-</sup> Ir1 / 0.84 e<sup>-</sup> N<sub>pyridine</sub> (α-spin)**

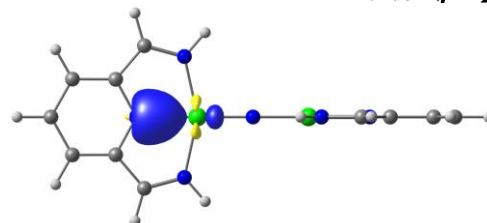

**LMO 132: 0.17 e<sup>-</sup> Ir1 / 0.84 e<sup>-</sup>**

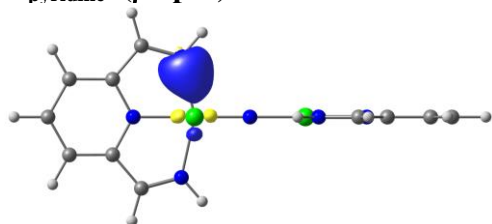

**LMO 44: 0.19 e<sup>-</sup> Ir1/0.84 e<sup>-</sup> N<sub>imine</sub> (α-spin)**

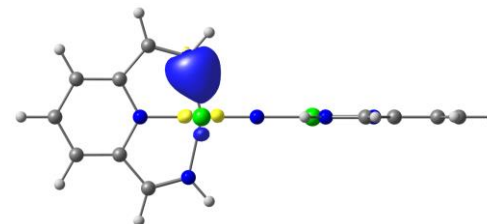

**LMO 133: 0.19 e<sup>-</sup> Ir1/0.84 e<sup>-</sup> N<sub>imine</sub> (β-spin)**

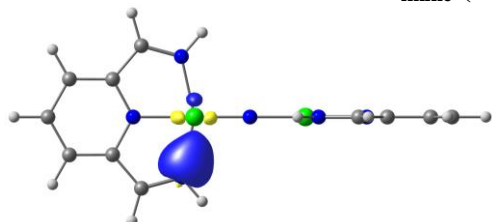

**LMO 45: 0.19 e<sup>-</sup> Ir1/0.84 e<sup>-</sup> N<sub>imine</sub> (α-spin)**

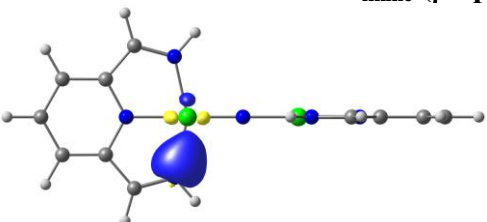

**LMO 133: 0.19 e<sup>-</sup> Ir1/0.84 e<sup>-</sup> N<sub>imine</sub> (β-spin)**

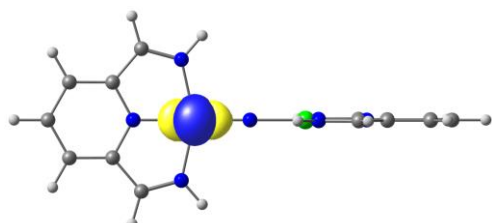

**LMO 72: 1.0 e<sup>-</sup> Ir1(d<sub>z2</sub>) (α-spin)**

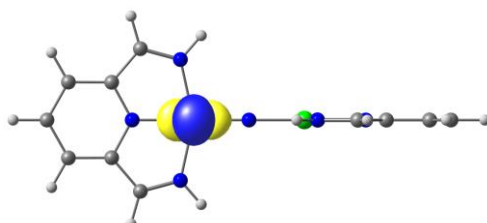

**LMO 164: 1.0 e<sup>-</sup> Ir1(d<sub>z2</sub>) (β-spin)**

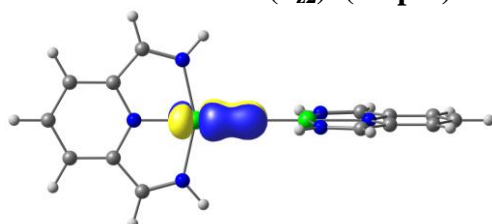

**LMO 80: 0.60 e<sup>-</sup> Ir1(d<sub>xz</sub>)/0.39 e<sup>-</sup> N<sub>nitrido</sub> (α-spin)**

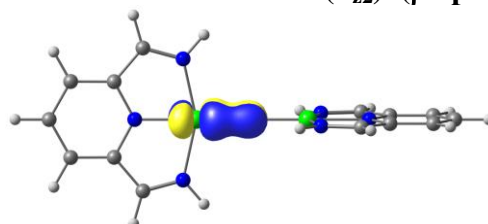

**LMO 169: 0.64 e<sup>-</sup> Ir1(d<sub>xz</sub>)/0.36 e<sup>-</sup> N<sub>nitrido</sub> (β-spin)**

The values for the α- and β-LMOs were averaged ((0.58+0.71)/2=0.64)

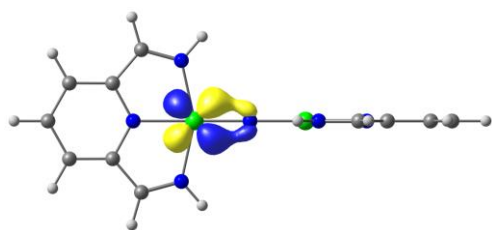

**LMO 87: 0.84 e<sup>-</sup> Ir1(d<sub>xv</sub>)/0.19 e<sup>-</sup> N<sub>nitrido</sub> (α-spin)**

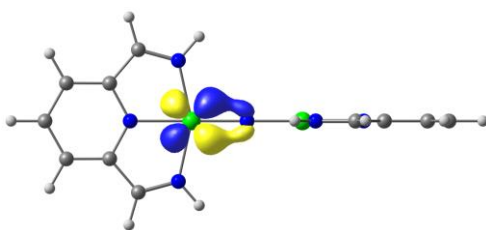

**LMO 175: 0.84 e<sup>-</sup> Ir1(d<sub>xv</sub>)/0.11 e<sup>-</sup> N<sub>nitrido</sub> (β-spin)**

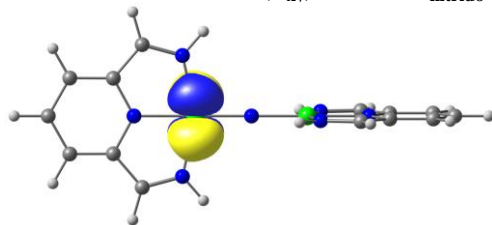

**LMO 90: 0.84 e<sup>-</sup> Ir1(d<sub>yz</sub>) (α-spin)**

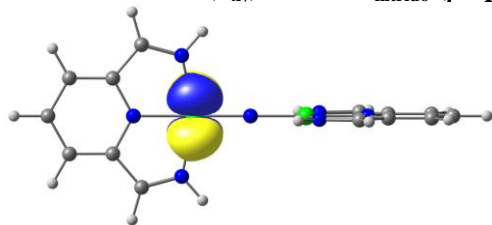

**LMO 182: 0.85 e<sup>-</sup> Ir1(d<sub>yz</sub>) (β-spin)**

The values for the α- and β-LMOs were averaged ((0.84+0.85)/2=0.85)

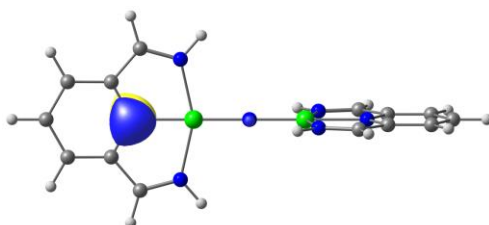

**LMO 79: PDI ligand-1 (non-innocent) 0.74 e<sup>-</sup> N<sub>pyridine</sub> (α-spin)**

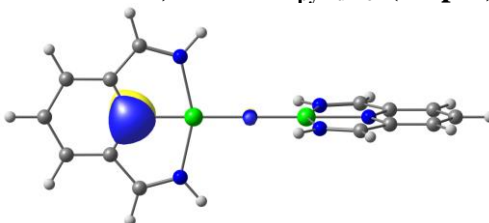

**LMO 177: PDI ligand-1 (non-innocent) 0.73 e<sup>-</sup> N<sub>pyridine</sub> (β-spin)**

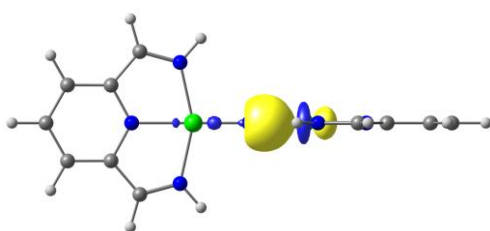

**LMO 39: 0.32 e<sup>-</sup> Ir2/0.70 e<sup>-</sup> N<sub>nitrido</sub> (α-spin)**

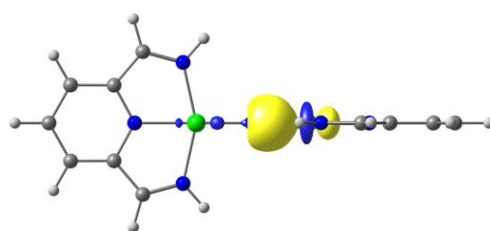

**LMO 130: 0.33 e<sup>-</sup> Ir2/0.70 e<sup>-</sup> N<sub>nitrido</sub> (β-spin)**

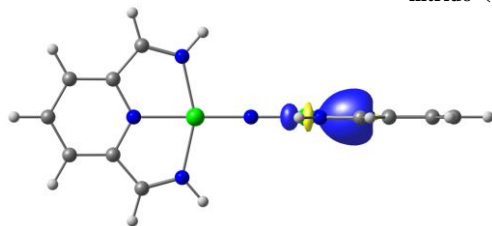

**LMO 41: 0.17 e<sup>-</sup> Ir2/0.84 e<sup>-</sup> N<sub>pyridine</sub> (α-spin)**

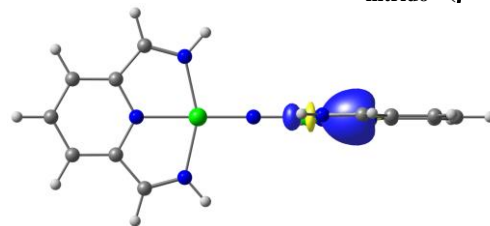

**LMO 131: 0.17 e<sup>-</sup> Ir2/0.84 e<sup>-</sup> N<sub>pyridine</sub> (β-spin)**

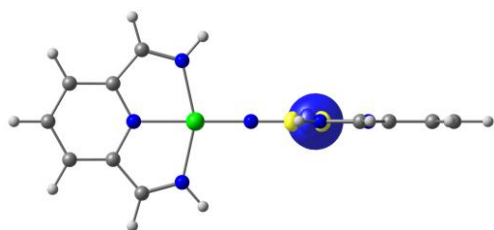

**LMO 42: 0.19 e<sup>-</sup> Ir2/0.84 e<sup>-</sup> N<sub>imine</sub> (α-spin)**

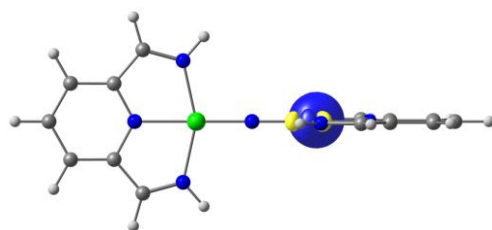

**LMO 136: 0.19 e<sup>-</sup> Ir2/0.84 e<sup>-</sup> N<sub>imine</sub> (β-spin)**

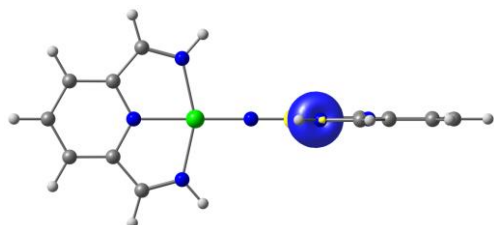

**LMO 43: 0.19 e<sup>-</sup> Ir2/0.84 e<sup>-</sup> N<sub>imine</sub> (α-spin)**

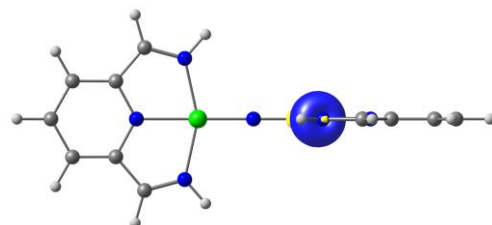

**LMO 135: 0.19 e<sup>-</sup> Ir2 / 0.84 e<sup>-</sup> N<sub>imine</sub> (β-spin)**

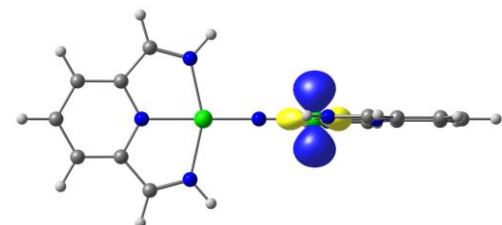

**LMO 73: 1.0 e<sup>-</sup> Ir2(d<sub>z2</sub>) (α-spin)**

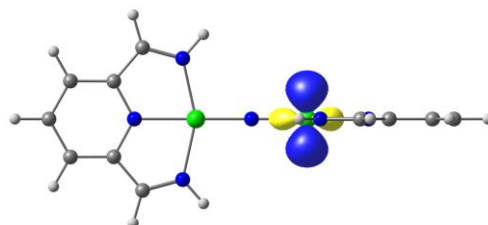

**LMO 163: 1.0 e<sup>-</sup> Ir2(d<sub>z2</sub>) (β-spin)**

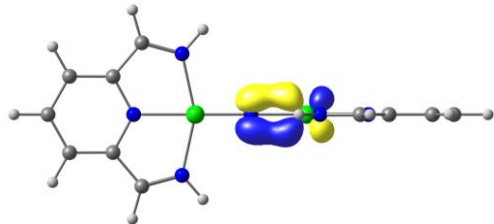

**LMO 81: 0.61 e<sup>-</sup> Ir2(d<sub>xz</sub>)/0.39 e<sup>-</sup> N<sub>nitrido</sub> (α-spin)**

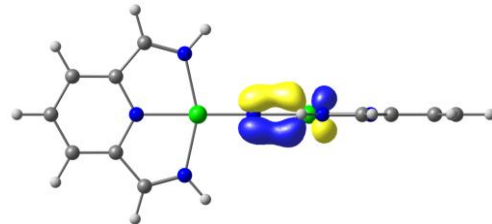

**LMO 170: 0.64 e<sup>-</sup> Ir2(d<sub>xz</sub>)/0.36 e<sup>-</sup> N<sub>nitrido</sub> (β-spin)**

The values for the α- and β-LMOs were averaged ((0.61+0.64)/2≈0.63).

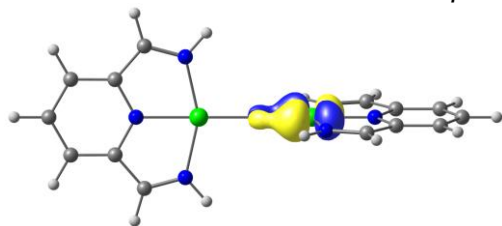

**LMO 86: 0.84 e<sup>-</sup> Ir2(d<sub>xy</sub>)/0.11 e<sup>-</sup> N<sub>nitrido</sub> (α-spin)**

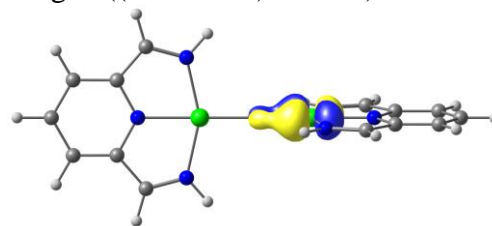

**LMO 176: 0.84 e<sup>-</sup> Ir2(d<sub>xy</sub>)/0.11 e<sup>-</sup> N<sub>nitrido</sub>(β-spin)**

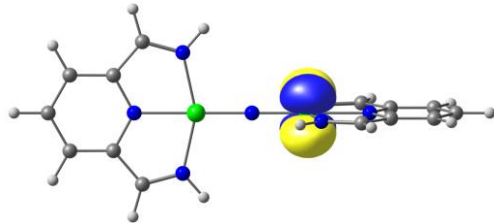

**LMO 91: 0.84 e<sup>-</sup> Ir2(d<sub>yz</sub>) (α-spin)**

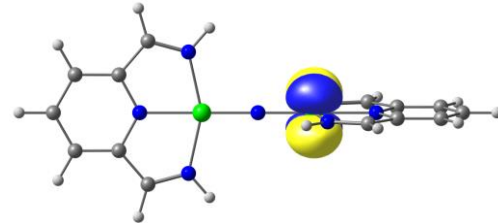

**LMO 181: 0.85 e<sup>-</sup> Ir2(d<sub>yz</sub>) (β-spin)**

The values for the α- and β-LMOs were averaged ((0.84+0.85)/2≈0.85).

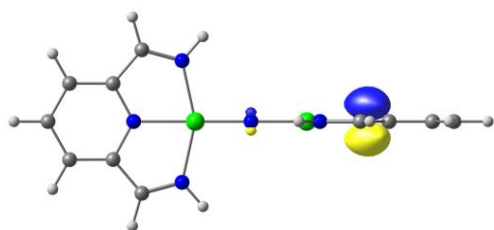

**LMO 78: PDI ligand-2 (non-innocent) 0.74 e<sup>-</sup> N<sub>pyridine</sub> (α-spin)**

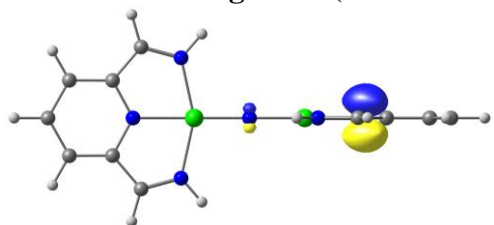

**LMO 178: PDI ligand-2 (non-innocent) 0.73 e<sup>-</sup> N<sub>pyridine</sub> β-spin**



## Mulliken Population Analysis & LMOs (Pipek-Mezey) for the anionic model system of $\text{Ir}_2\text{N}^-$

restricted Kohn-Sham DFT, BP86 functional; MPA values with contributions of > 10% are given.

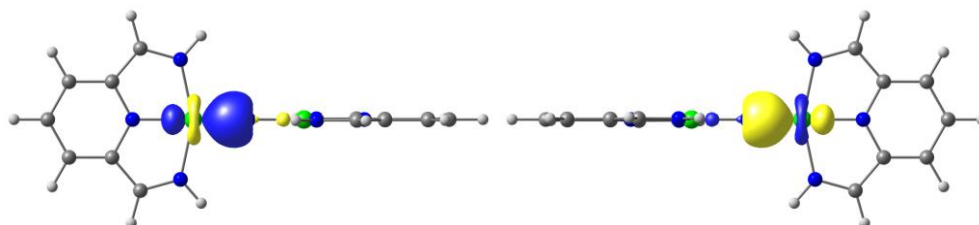

**LMO 38: 0.64  $e^-$  Ir1 / 1.40  $e^-$   $\text{N}_{\text{nitrido}}$**

**LMO 39: 0.64  $e^-$  Ir2 / 1.40  $e^-$   $\text{N}_{\text{nitrido}}$**

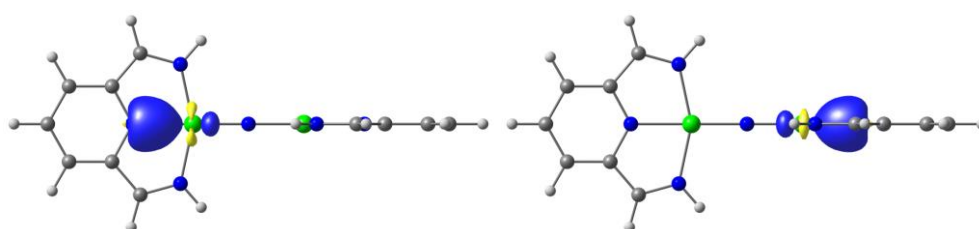

**LMO 41: 0.35  $e^-$  Ir1 / 1.66  $e^-$   $\text{N}_{\text{pyridine1}}$**

**LMO 40: 0.35  $e^-$  Ir1 / 1.66  $e^-$   $\text{N}_{\text{pyridine2}}$**

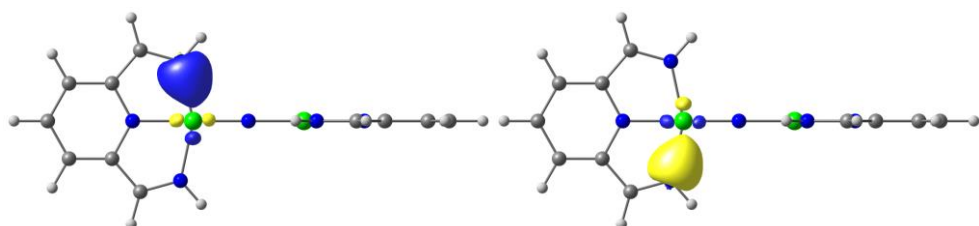

**LMO 42: 0.39  $e^-$  Ir1 / 1.67  $e^-$   $\text{N}_{\text{imine}}$**

**LMO 44: 0.39  $e^-$  Ir1 / 1.67  $e^-$   $\text{N}_{\text{imine}}$**

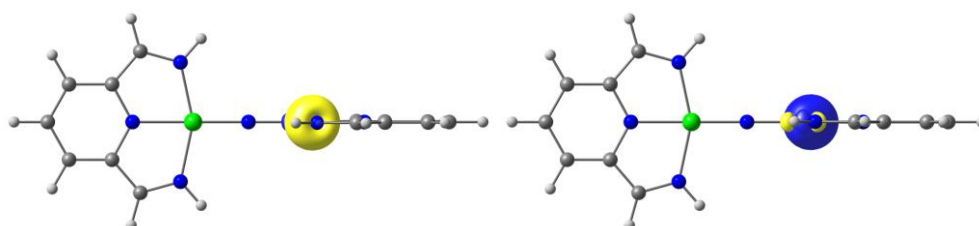

**LMO 43: 0.39  $e^-$  Ir2 / 1.67  $e^-$   $\text{N}_{\text{imine}}$**

**LMO 45: 0.39  $e^-$  Ir2 / 1.67  $e^-$   $\text{N}_{\text{imine}}$**

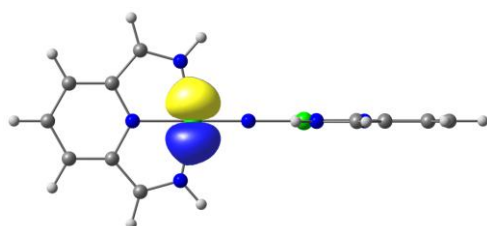

**LMO 90: 1.63  $e^-$  Ir1( $d_{yz}$ )**

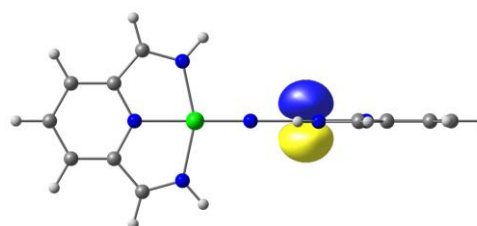

**LMO 91: 1.63  $e^-$  Ir2( $d_{yz}$ )**



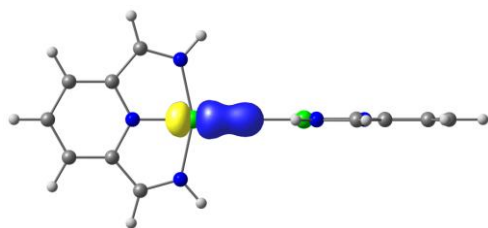

**LMO 82:** 1.26 e<sup>-</sup> Ir1(d<sub>xz</sub>) / 0.72 e<sup>-</sup> N<sub>nitrido</sub>

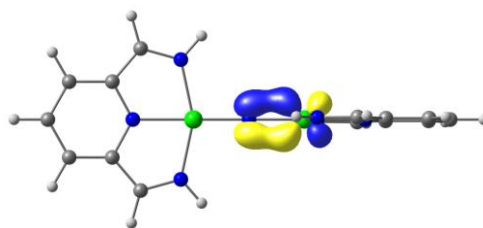

**LMO 83:** 1.26 e<sup>-</sup> Ir2(d<sub>xz</sub>) / 0.72 e<sup>-</sup> N<sub>nitrido</sub>

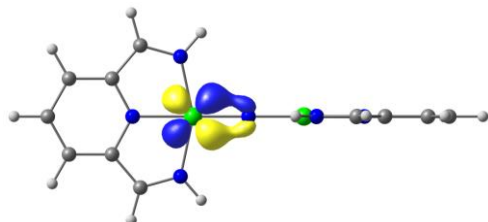

**LMO 84:** 1.67 e<sup>-</sup> Ir1(d<sub>xy</sub>) / 0.22 e<sup>-</sup> N<sub>nitrido</sub>

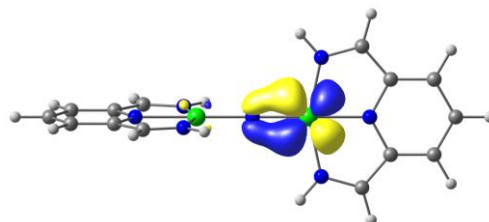

**LMO 85:** 1.67 e<sup>-</sup> Ir2(d<sub>xy</sub>) / 0.22 e<sup>-</sup> N<sub>nitrido</sub>

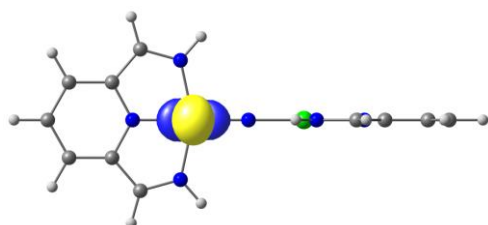

**LMO 88:** 2 e<sup>-</sup> Ir1(d<sub>z2</sub>)

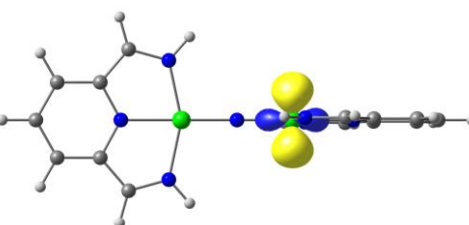

**LMO 89:** 2 e<sup>-</sup> Ir2(d<sub>z2</sub>)

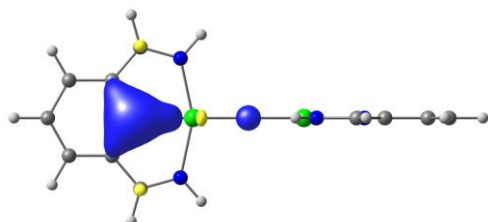

**LMO 86:** PDI<sup>2-</sup> / 0.19 e<sup>-</sup> Ir1(d<sub>xz</sub>) / 1.46 e<sup>-</sup> N<sub>pyridine1</sub> / 0.12 N<sub>nitrido</sub>

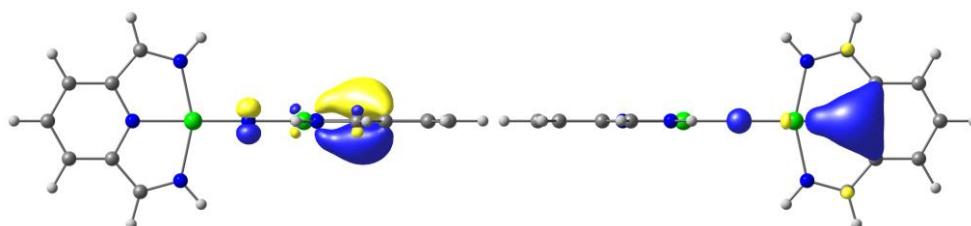

**LMO 87:** PDI<sup>2-</sup> / 0.19 e<sup>-</sup> Ir2(d<sub>xz</sub>) / 1.46 e<sup>-</sup> N<sub>pyridine2</sub> / 0.12 N<sub>nitrido</sub>

Table S7. DFT (BP86 functional) optimized geometry of the model compound for IrCl ( $C_{2v}$  symmetry, xmol xyz format in Å).

19

Energy = -999.6518098115 Hartree

|    |            |           |            |
|----|------------|-----------|------------|
| H  | 2.1824678  | 0.0000000 | -2.4503072 |
| C  | 1.2232530  | 0.0000000 | -1.9091762 |
| C  | -1.2173279 | 0.0000000 | -0.5019571 |
| C  | 1.2173279  | 0.0000000 | -0.5019571 |
| C  | 0.0000000  | 0.0000000 | -2.6068198 |
| C  | -1.2232530 | 0.0000000 | -1.9091762 |
| N  | 0.0000000  | 0.0000000 | 0.1760927  |
| H  | 0.0000000  | 0.0000000 | -3.7081322 |
| H  | -2.1824678 | 0.0000000 | -2.4503072 |
| Ir | 0.0000000  | 0.0000000 | 2.0893762  |
| C  | 2.3088562  | 0.0000000 | 0.4384305  |
| H  | 3.3654803  | 0.0000000 | 0.1238675  |
| N  | 1.9604987  | 0.0000000 | 1.7275393  |
| H  | 2.7455187  | 0.0000000 | 2.4001515  |
| C  | -2.3088562 | 0.0000000 | 0.4384305  |
| H  | -3.3654803 | 0.0000000 | 0.1238675  |
| N  | -1.9604987 | 0.0000000 | 1.7275393  |
| H  | -2.7455187 | 0.0000000 | 2.4001515  |
| Cl | 0.0000000  | 0.0000000 | 4.3923865  |

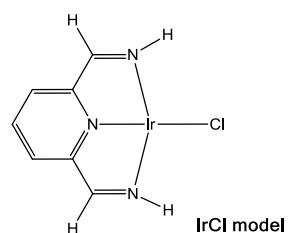

Table S8. DFT (BP86 functional) optimized geometry of the model compound for IrN ( $C_{2v}$  symmetry, xmol xyz format in Å).

19

Energy = -594.1720053005 Hartree

|    |            |           |            |
|----|------------|-----------|------------|
| H  | 2.1825652  | 0.0000000 | -2.4292666 |
| C  | 1.2221739  | 0.0000000 | -1.8890582 |
| C  | -1.2113551 | 0.0000000 | -0.4834271 |
| C  | 1.2113551  | 0.0000000 | -0.4834271 |
| C  | 0.0000000  | 0.0000000 | -2.5907419 |
| C  | -1.2221739 | 0.0000000 | -1.8890582 |
| N  | 0.0000000  | 0.0000000 | 0.2031062  |
| H  | 0.0000000  | 0.0000000 | -3.6921244 |
| H  | -2.1825652 | 0.0000000 | -2.4292666 |
| Ir | 0.0000000  | 0.0000000 | 2.2769536  |
| C  | 2.2979920  | 0.0000000 | 0.4338143  |
| H  | 3.3593041  | 0.0000000 | 0.1417744  |
| N  | 1.9401050  | 0.0000000 | 1.7287923  |
| H  | 2.7036392  | 0.0000000 | 2.4145560  |
| C  | -2.2979920 | 0.0000000 | 0.4338143  |
| H  | -3.3593041 | 0.0000000 | 0.1417744  |
| N  | -1.9401050 | 0.0000000 | 1.7287923  |
| H  | -2.7036392 | 0.0000000 | 2.4145560  |
| N  | 0.0000000  | 0.0000000 | 3.9684363  |

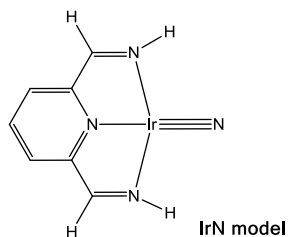

Table S9. DFT (BP86 functional) optimized geometry of the cationic model compound for  $\text{Ir}_2\text{N}_3^+$  ( $D_{2d}$  symmetry, xmol xyz format in Å).

39

Energy = -1242.974709781 Hartree

|    |            |            |             |
|----|------------|------------|-------------|
| H  | 1.5423390  | -1.5423390 | 7.6676157   |
| C  | 0.8631855  | -0.8631855 | 7.1297886   |
| C  | -0.8565838 | 0.8565838  | 5.7238185   |
| C  | 0.8565838  | -0.8565838 | 5.7238185   |
| C  | 0.0000000  | 0.0000000  | 7.8300504   |
| C  | -0.8631855 | 0.8631855  | 7.1297886   |
| N  | 0.0000000  | 0.0000000  | 5.0431138   |
| H  | 0.0000000  | 0.0000000  | 8.9309031   |
| H  | -1.5423390 | 1.5423390  | 7.6676157   |
| Ir | 0.0000000  | 0.0000000  | 3.1161042   |
| C  | 1.6344114  | -1.6344114 | 4.7923083   |
| H  | 2.3801673  | -2.3801673 | 5.1127892   |
| N  | 1.3945192  | -1.3945192 | 3.5067046   |
| H  | 1.9525871  | -1.9525871 | 2.8428633   |
| C  | -1.6344114 | 1.6344114  | 4.7923083   |
| H  | -2.3801673 | 2.3801673  | 5.1127892   |
| N  | -1.3945192 | 1.3945192  | 3.5067046 e |
| H  | -1.9525871 | 1.9525871  | 2.8428633   |
| N  | 0.0000000  | 0.0000000  | 0.0000000   |
| Ir | 0.0000000  | 0.0000000  | -3.1161042  |
| N  | 0.0000000  | 0.0000000  | -5.0431138  |
| C  | 0.0000000  | 0.0000000  | -7.8300504  |
| C  | -0.8565838 | -0.8565838 | -5.7238185  |
| C  | 0.8565838  | 0.8565838  | -5.7238185  |
| C  | 0.8631855  | 0.8631855  | -7.1297886  |
| C  | -0.8631855 | -0.8631855 | -7.1297886  |
| H  | 1.5423390  | 1.5423390  | -7.6676157  |
| H  | -1.5423390 | -1.5423390 | -7.6676157  |
| H  | 0.0000000  | 0.0000000  | -8.9309031  |
| C  | -1.6344114 | -1.6344114 | -4.7923083  |
| H  | -2.3801673 | -2.3801673 | -5.1127892  |
| C  | 1.6344114  | 1.6344114  | -4.7923083  |
| H  | 2.3801673  | 2.3801673  | -5.1127892  |
| N  | -1.3945192 | -1.3945192 | -3.5067046  |
| H  | -1.9525871 | -1.9525871 | -2.8428633  |
| N  | 1.3945192  | 1.3945192  | -3.5067046  |
| H  | 1.9525871  | 1.9525871  | -2.8428633  |
| N  | 0.0000000  | 0.0000000  | 1.1848195   |
| N  | 0.0000000  | 0.0000000  | -1.1848195  |

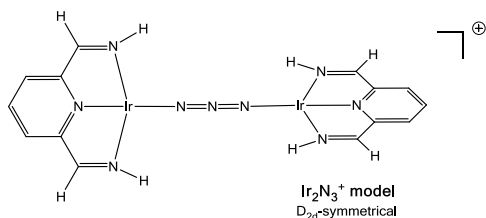

Table S10. DFT (BP86 functional) optimized geometry of the cationic model compound for  $\text{Ir}_2\text{N}^+$  ( $S=1$ ,  $\langle S^2 \rangle = 2.01$ ,  $D_{2d}$  symmetry,  $\text{xmol xyz}$  format in Å). The total energy of the broken symmetry solution amounts to -1133.5630693H,  $\langle S^2 \rangle$  equals 1.013 (cf. Table S5).

37

Energy = -1133.563152940 Hartree

|    |            |            |            |
|----|------------|------------|------------|
| H  | -1.5439737 | -1.5439737 | -6.4135007 |
| C  | -0.8672947 | -0.8672947 | -5.8695749 |
| C  | 0.8567321  | 0.8567321  | -4.4637809 |
| C  | -0.8567321 | -0.8567321 | -4.4637809 |
| C  | 0.0000000  | -0.0000000 | -6.5650483 |
| C  | 0.8672947  | 0.8672947  | -5.8695749 |
| N  | -0.0000000 | 0.0000000  | -3.8030816 |
| H  | -0.0000000 | 0.0000000  | -7.6662275 |
| H  | 1.5439737  | 1.5439737  | -6.4135007 |
| Ir | 0.0000000  | -0.0000000 | -1.7909625 |
| C  | -1.6325942 | -1.6325942 | -3.5245119 |
| H  | -2.3795959 | -2.3795959 | -3.8379357 |
| N  | -1.3923514 | -1.3923514 | -2.2348713 |
| H  | -1.9434831 | -1.9434831 | -1.5617143 |
| C  | 1.6325942  | 1.6325942  | -3.5245119 |
| H  | 2.3795959  | 2.3795959  | -3.8379357 |
| N  | 1.3923514  | 1.3923514  | -2.2348713 |
| H  | 1.9434831  | 1.9434831  | -1.5617143 |
| N  | 0.0000000  | 0.0000000  | 0.0000000  |
| Ir | 0.0000000  | 0.0000000  | 1.7909625  |
| N  | -0.0000000 | -0.0000000 | 3.8030816  |
| C  | 0.0000000  | 0.0000000  | 6.5650483  |
| C  | 0.8567321  | -0.8567321 | 4.4637809  |
| C  | -0.8567321 | 0.8567321  | 4.4637809  |
| C  | -0.8672947 | 0.8672947  | 5.8695749  |
| C  | 0.8672947  | -0.8672947 | 5.8695749  |
| H  | -1.5439737 | 1.5439737  | 6.4135007  |
| H  | 1.5439737  | -1.5439737 | 6.4135007  |
| H  | -0.0000000 | -0.0000000 | 7.6662275  |
| C  | 1.6325942  | -1.6325942 | 3.5245119  |
| H  | 2.3795959  | -2.3795959 | 3.8379357  |
| C  | -1.6325942 | 1.6325942  | 3.5245119  |
| H  | -2.3795959 | 2.3795959  | 3.8379357  |
| N  | 1.3923514  | -1.3923514 | 2.2348713  |
| H  | 1.9434831  | -1.9434831 | 1.5617143  |
| N  | -1.3923514 | 1.3923514  | 2.2348713  |
| H  | -1.9434831 | 1.9434831  | 1.5617143  |

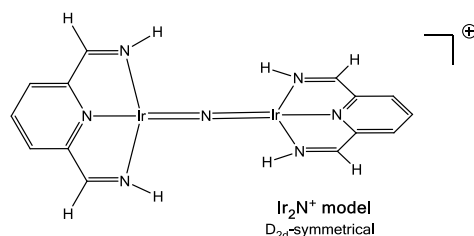

Table S11. DFT (BP86 functional) optimized geometry of the neutral model compound for Ir<sub>2</sub>N (S=1/2, <S<sup>2</sup>> = 0.752 D<sub>2d</sub> symmetry, xmol xyz format in Å).

37

Energy = -1133.751294045

|    |            |            |            |
|----|------------|------------|------------|
| H  | -1.5447058 | -1.5447058 | -6.4129784 |
| C  | -0.8683143 | -0.8683143 | -5.8668386 |
| C  | 0.8640699  | 0.8640699  | -4.4607253 |
| C  | -0.8640699 | -0.8640699 | -4.4607253 |
| C  | -0.0000000 | 0.0000000  | -6.5622485 |
| C  | 0.8683143  | 0.8683143  | -5.8668386 |
| N  | 0.0000000  | -0.0000000 | -3.7943620 |
| H  | 0.0000000  | 0.0000000  | -7.6640907 |
| H  | 1.5447058  | 1.5447058  | -6.4129784 |
| Ir | -0.0000000 | 0.0000000  | -1.8014186 |
| C  | -1.6329155 | -1.6329155 | -3.5295855 |
| H  | -2.3813219 | -2.3813219 | -3.8353036 |
| N  | -1.3848245 | -1.3848245 | -2.2284393 |
| H  | -1.9337201 | -1.9337201 | -1.5525177 |
| C  | 1.6329155  | 1.6329155  | -3.5295855 |
| H  | 2.3813219  | 2.3813219  | -3.8353036 |
| N  | 1.3848245  | 1.3848245  | -2.2284393 |
| H  | 1.9337201  | 1.9337201  | -1.5525177 |
| N  | 0.0000000  | 0.0000000  | 0.0000000  |
| Ir | -0.0000000 | -0.0000000 | 1.8014186  |
| N  | 0.0000000  | 0.0000000  | 3.7943620  |
| C  | -0.0000000 | -0.0000000 | 6.5622485  |
| C  | 0.8640699  | -0.8640699 | 4.4607253  |
| C  | -0.8640699 | 0.8640699  | 4.4607253  |
| C  | -0.8683143 | 0.8683143  | 5.8668386  |
| C  | 0.8683143  | -0.8683143 | 5.8668386  |
| H  | -1.5447058 | 1.5447058  | 6.4129784  |
| H  | 1.5447058  | -1.5447058 | 6.4129784  |
| H  | 0.0000000  | 0.0000000  | 7.6640907  |
| C  | 1.6329155  | -1.6329155 | 3.5295855  |
| H  | 2.3813219  | -2.3813219 | 3.8353036  |
| C  | -1.6329155 | 1.6329155  | 3.5295855  |
| H  | -2.3813219 | 2.3813219  | 3.8353036  |
| N  | 1.3848245  | -1.3848245 | 2.2284393  |
| H  | 1.9337201  | -1.9337201 | 1.5525177  |
| N  | -1.3848245 | 1.3848245  | 2.2284393  |
| H  | -1.9337201 | 1.9337201  | 1.5525177  |

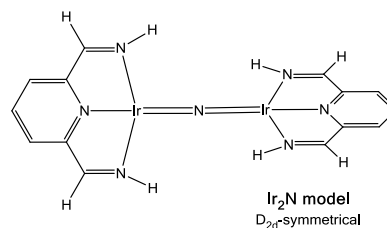

Table S12. DFT (BP86 functional) optimized geometry of the neutral model compound for Ir<sub>2</sub>N (S=3/2, <S<sup>2</sup>> = 3.76, D<sub>2d</sub> symmetry, xmol xyz format in Å). Electron configuration:

α: .. 22(a<sub>1</sub>)<sup>1</sup>(3a<sub>2</sub>)<sup>1</sup>(4b<sub>1</sub>)<sup>1</sup>(21b<sub>2</sub>)<sup>1</sup>(21e)<sup>1</sup>

β: .. 22(a<sub>1</sub>)<sup>1</sup>(3a<sub>2</sub>)<sup>1</sup>(3b<sub>1</sub>)<sup>1</sup>(21b<sub>2</sub>)<sup>1</sup>(20e)<sup>1</sup>

37

Energy = -1133.716403252 Hartree quartet state

|    |            |            |            |
|----|------------|------------|------------|
| H  | -1.5458241 | -1.5458241 | -6.4272596 |
| C  | -0.8692331 | -0.8692331 | -5.8835590 |
| C  | 0.8595527  | 0.8595527  | -4.4644645 |
| C  | -0.8595527 | -0.8595527 | -4.4644645 |
| C  | -0.0000000 | 0.0000000  | -6.5713164 |
| C  | 0.8692331  | 0.8692331  | -5.8835590 |
| N  | -0.0000000 | 0.0000000  | -3.8075733 |
| H  | 0.0000000  | 0.0000000  | -7.6739735 |
| H  | 1.5458241  | 1.5458241  | -6.4272596 |
| Ir | 0.0000000  | -0.0000000 | -1.7883600 |
| C  | -1.6308999 | -1.6308999 | -3.5325940 |
| H  | -2.3765723 | -2.3765723 | -3.8544555 |
| N  | -1.4017432 | -1.4017432 | -2.2280845 |
| H  | -1.9537045 | -1.9537045 | -1.5604557 |
| C  | 1.6308999  | 1.6308999  | -3.5325940 |
| H  | 2.3765723  | 2.3765723  | -3.8544555 |
| N  | 1.4017432  | 1.4017432  | -2.2280845 |
| H  | 1.9537045  | 1.9537045  | -1.5604557 |
| N  | 0.0000000  | 0.0000000  | 0.0000000  |
| Ir | 0.0000000  | 0.0000000  | 1.7883600  |
| N  | -0.0000000 | -0.0000000 | 3.8075733  |
| C  | -0.0000000 | -0.0000000 | 6.5713164  |
| C  | 0.8595527  | -0.8595527 | 4.4644645  |
| C  | -0.8595527 | 0.8595527  | 4.4644645  |
| C  | -0.8692331 | 0.8692331  | 5.8835590  |
| C  | 0.8692331  | -0.8692331 | 5.8835590  |
| H  | -1.5458241 | 1.5458241  | 6.4272596  |
| H  | 1.5458241  | -1.5458241 | 6.4272596  |
| H  | 0.0000000  | 0.0000000  | 7.6739735  |
| C  | 1.6308999  | -1.6308999 | 3.5325940  |
| H  | 2.3765723  | -2.3765723 | 3.8544555  |
| C  | -1.6308999 | 1.6308999  | 3.5325940  |
| H  | -2.3765723 | 2.3765723  | 3.8544555  |
| N  | 1.4017432  | -1.4017432 | 2.2280845  |
| H  | 1.9537045  | -1.9537045 | 1.5604557  |
| N  | -1.4017432 | 1.4017432  | 2.2280845  |
| H  | -1.9537045 | 1.9537045  | 1.5604557  |

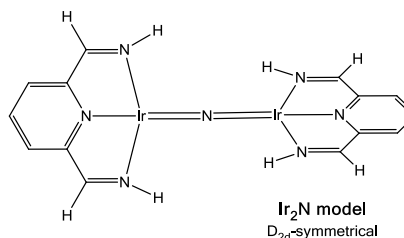

Table S13. DFT (BP86 functional) optimized geometry of the anionic model compound for  $\text{Ir}_2\text{N}^-$  in  $D_{2d}$  symmetry (xmol xyz format in Å).

37

Energy = -1133.820684559 Hartree

|    |            |            |            |
|----|------------|------------|------------|
| H  | -1.5465735 | -1.5465735 | -6.4196086 |
| C  | -0.8703093 | -0.8703093 | -5.8699412 |
| C  | 0.8714964  | 0.8714964  | -4.4627162 |
| C  | -0.8714964 | -0.8714964 | -4.4627162 |
| C  | -0.0000000 | 0.0000000  | -6.5656122 |
| C  | 0.8703093  | 0.8703093  | -5.8699412 |
| N  | -0.0000000 | 0.0000000  | -3.7916399 |
| H  | -0.0000000 | 0.0000000  | -7.6691736 |
| H  | 1.5465735  | 1.5465735  | -6.4196086 |
| Ir | -0.0000000 | 0.0000000  | -1.8129956 |
| C  | -1.6346282 | -1.6346282 | -3.5381662 |
| H  | -2.3850238 | -2.3850238 | -3.8364059 |
| N  | -1.3782008 | -1.3782008 | -2.2246022 |
| H  | -1.9257816 | -1.9257816 | -1.5460720 |
| C  | 1.6346282  | 1.6346282  | -3.5381662 |
| H  | 2.3850238  | 2.3850238  | -3.8364059 |
| N  | 1.3782008  | 1.3782008  | -2.2246022 |
| H  | 1.9257816  | 1.9257816  | -1.5460720 |
| N  | -0.0000000 | 0.0000000  | 0.0000000  |
| Ir | -0.0000000 | -0.0000000 | 1.8129956  |
| N  | -0.0000000 | -0.0000000 | 3.7916399  |
| C  | -0.0000000 | -0.0000000 | 6.5656122  |
| C  | 0.8714964  | -0.8714964 | 4.4627162  |
| C  | -0.8714964 | 0.8714964  | 4.4627162  |
| C  | -0.8703093 | 0.8703093  | 5.8699412  |
| C  | 0.8703093  | -0.8703093 | 5.8699412  |
| H  | -1.5465735 | 1.5465735  | 6.4196086  |
| H  | 1.5465735  | -1.5465735 | 6.4196086  |
| H  | -0.0000000 | -0.0000000 | 7.6691736  |
| C  | 1.6346282  | -1.6346282 | 3.5381662  |
| H  | 2.3850238  | -2.3850238 | 3.8364059  |
| C  | -1.6346282 | 1.6346282  | 3.5381662  |
| H  | -2.3850238 | 2.3850238  | 3.8364059  |
| N  | 1.3782008  | -1.3782008 | 2.2246022  |
| H  | 1.9257816  | -1.9257816 | 1.5460720  |
| N  | -1.3782008 | 1.3782008  | 2.2246022  |
| H  | -1.9257816 | 1.9257816  | 1.5460720  |

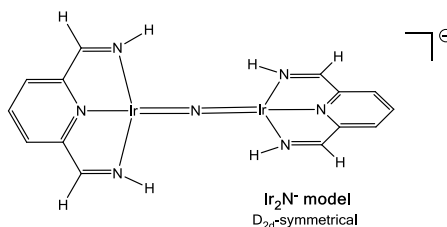



## References

- S1 M. A. Arthurs, J. Bickerton, S. R. Stobart, J. J. Wang, *Organometallics* 1998, **17**, 2743.
- S2 J.-Y. Liu, Y. Zheng, N.-H. Hu, Y.-S. Li, *Chin. J. Chem.* 2006, **24**, 1447.
- S3 I. Krossing, A. Reisinger, *Eur. J. Inorg. Chem.*, 2005, 1979.
- S4 S. Nüchel, P. Burger, *Organometallics* 2001, **20**, 4345.
- S5 D. Sieh, M. Schlimm, L. Andernach, F. Angersbach, S. Nüchel, J. Schöffel, N. Šušnjar, P. Burger, *Eur. J. Inorg. Chem.* 2012, 1444.
- S6 D.F. Evans, *J. Chem. Soc.* 1959, 2003.
- S7 E.M. Schubert, *J. Chem. Ed.* 1992, **69**, 62.
- S8 G. P. Arrighini, M. Maestro, R. Moccia, *J. Chem. Phys.* 1968, **49**, 882.
- S9 G.M. Sheldrick, in *SHELXS-97, SHELXL-97 programs for crystal structure solution and refinement*. (Universität Göttingen, Germany, 1993 and 1997).
- S10 L.J. Farrugia, *J. Appl. Crystallogr.*, 1997, **30**, 568.
- S11 D.R. Eaton, W.D. Phillips, D.J. Cadwell, *J. Am. Chem. Soc.*, 1963, **85**, 397;  
L.W. Pignolet, W.D. Horrocks, Jr. *J. Am. Chem. Soc.* 1969, **81**, 3976.
- S12 O. Treutler, R. Ahlrichs *J. Chem. Phys.* 1995, **102**, 346; R. Ahlrichs, M. Bär, M. Häser, H. Horn, C. Kölmel, *Chem. Phys. Lett.* 1989, **162**, 165; TURBOMOLE V6.5 2013, a development of University of Karlsruhe and Forschungszentrum Karlsruhe GmbH, 1989-2007, since 2007; available from <http://www.turbomole.com>.
- S13 A.D. Becke *Phys. Rev. A* 1988, **38**, 3098.
- S14 J.P. Perdew, J.P. *Phys. Rev. B.*, 1986, **33**, 8822.
- S16 D. Andrae, U. Haeussermann, M. Dolg, H. Stoll, H. Preuss, *Theor. Chim. Acta.* 1990, **77**, 1431.
- S17 A.E. Reed, R.B. Weinstock, F. Weinhold *J. Chem. Phys.* 1985, **83**, 735  
(charges and spin densities implemented in Turbomole).
- S18 A.J.W. Thom, E.J. Sundstrom, M. Head-Gordon, *Phys. Chem. Chem. Phys.*, 2009, **11**, 11297
- S19 Multiwfn: <http://multiwfn.codeplex.com/>; T. Lu, F. Chen, *J. Mol. Graph. Model.*, 2012, **38**, 314.
- S20 Molden2AIM: <http://people.smu.edu/wzou/program/>
- S21 <http://www.chemcraftprog.com>
- S22 T. Soda, Y. Kitagawa, T. Onishi, Y. Takano, Y. Shigeta, H. Nagao, Y. Yoshioka, and K. Yamaguchi *Chem. Phys. Lett.*, 2000, **319**, 223.
